# Supplementary material for: CancerNet: a unified deep learning network for pan-cancer diagnostics
Source: BMC Bioinformatics. 2022 Jun 13;23:229. doi: 10.1186/s12859-022-04783-y (PMC9195411; doi:10.1186/s12859-022-04783-y)
Supplement: Supplementary file 1 — Additional file 1. Supplementary figures. [file 12859_2022_4783_MOESM1_ESM.docx]

**Supplementary Materials**

Supplementary Table 1: GEO dataset information

| GEO accession number | Total number of samples | Primary site and comment |
| --- | --- | --- |
| GSE113019 | 55 | Liver- primary, tumor adjacent and metastasis |
| GSE113904 | 232 | COAD- age related drift study. no cancer data, all normal |
| GSE38240 | 12 | Prostate- metastatic |
| GSE58999 | 88 | Metastatic breast |
| GSE66313 | 55 | Ductal carcinoma breast |
| GSE67116 | 96 | Uterine metastasis |

Supplementary Table 2: Performance of CancerNet, CancerLocator, and a model based on random forest (RF model) in classifying 14 cancers encompassing hard tumors of the abdominal and thoracic cavities that were investigated in CancerLocator or RF model or both these studies. Performance was assessed using the overall accuracy metric F-measure. Highest F-measure value among the three methods is shown in boldface for each cancer type, as well as for the normal class. “x” denotes no value for a cancer (or normal) that was not included in the classification by a method.

| Type | RF model | CancerLocator | CancerNet |
| --- | --- | --- | --- |
| Urothelial Bladder Carcinoma | 0.673 | x | **0.999** |
| Breast Invasive Carcinoma | 0.979 | 0.476 | **0.998** |
| Colon Adenocarcinoma | **1.000** | x | 0.989 |
| Esophagial Carcinoma | 0.336 | x | **0.989** |
| Head and Neck Squamous Cell Carcinoma | 0.720 | x | **0.992** |
| Kidney Renal Clear Cell | 0.739 | x | **0.998** |
| Kidney Renal Papillary Cell | 0.695 | x | **0.998** |
| Liver Hepatocellular carcinoma | 0.965 | 0.847 | **0.998** |
| Lung Squamous Cell Carcinoma | 0.406 | x | **0.995** |
| Lung Adenocarcinoma | 0.773 | 0.612 | **0.997** |
| Pancreatic Adenocarcinoma | 0.712 | x | **0.997** |
| Prostate Adenocarcinoma | **1.000** | x | 0.997 |
| Thyroid carcinoma | 0.992 | x | **0.999** |
| Uterine Corpus Endometrial Carcinoma | 0.918 | x | **0.994** |
| Normal | x | 0.795 | **0.988** |

Supplementary Figures 1 – 38: Misclassification rates for cancers that were misclassified to one or more other cancer(s).


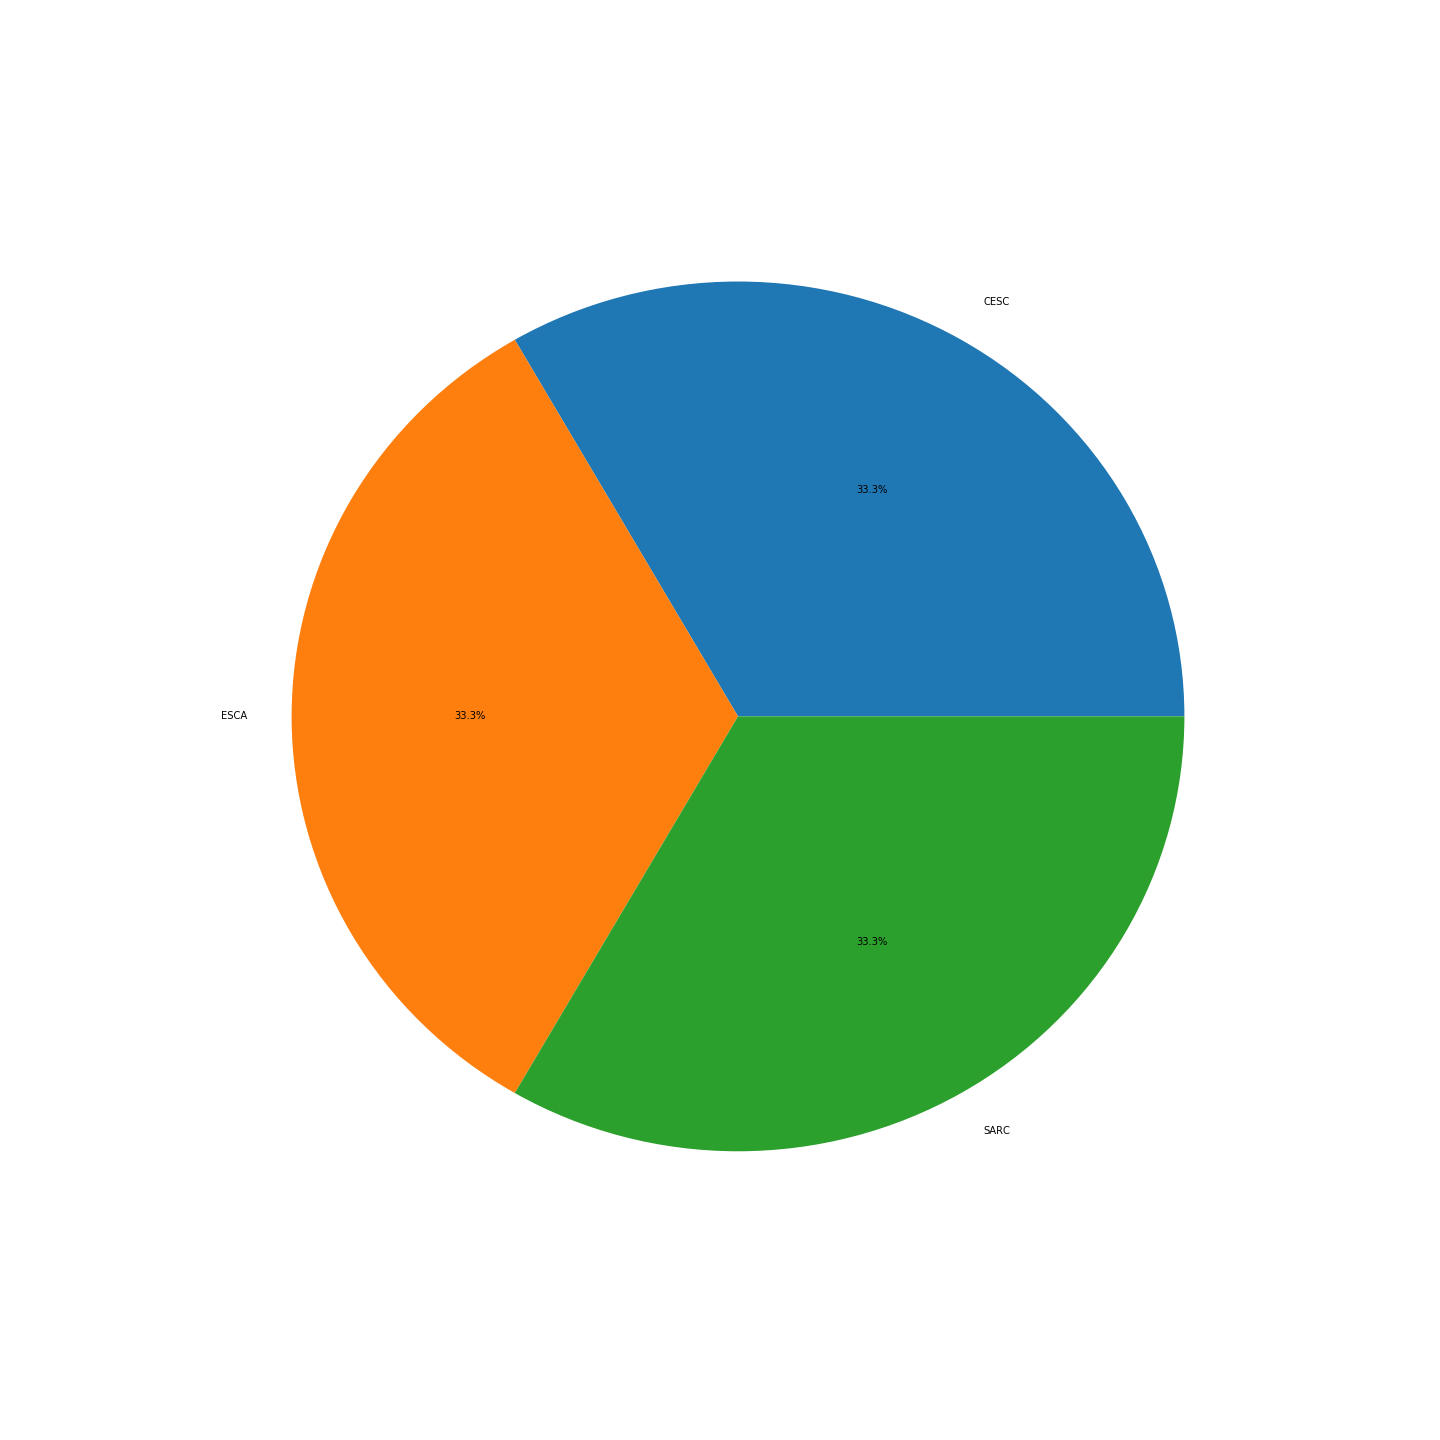


Supplementary Figure : BLCA


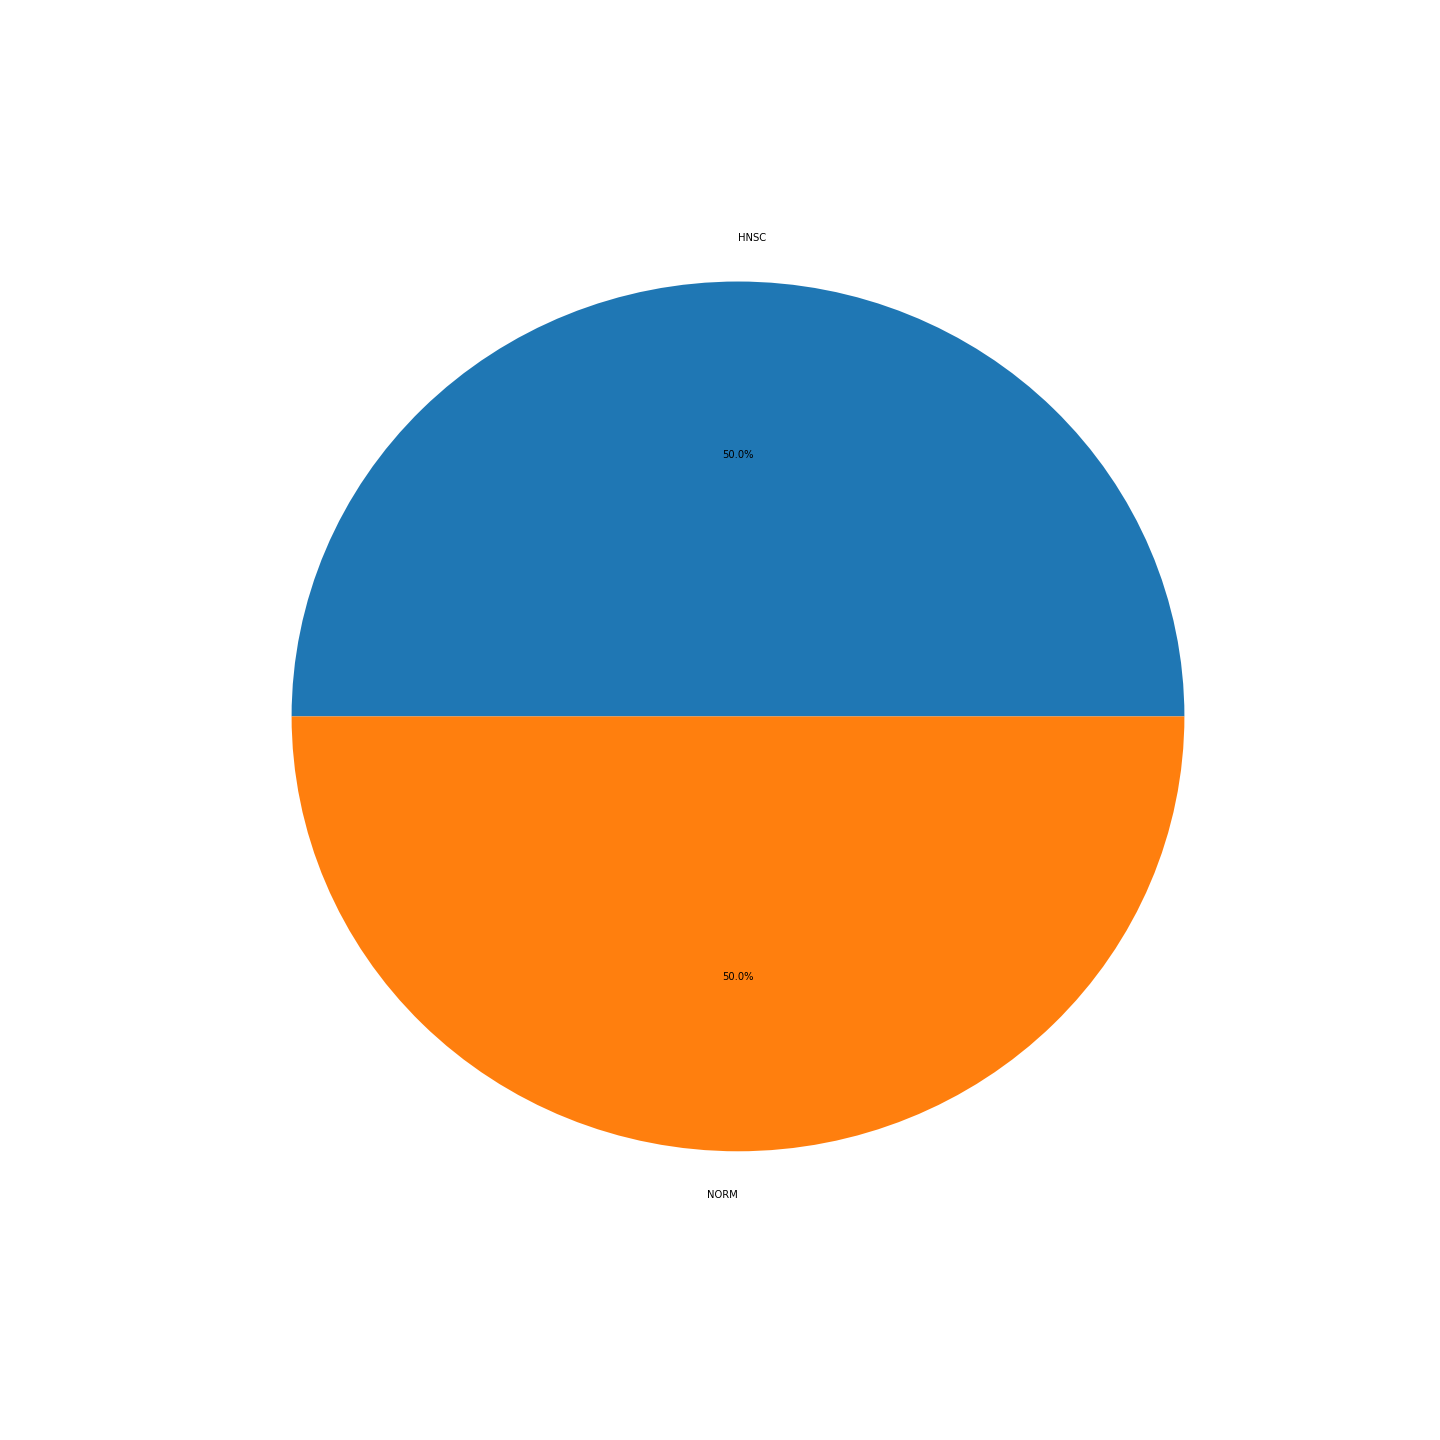


Supplementary Figure : BRCA


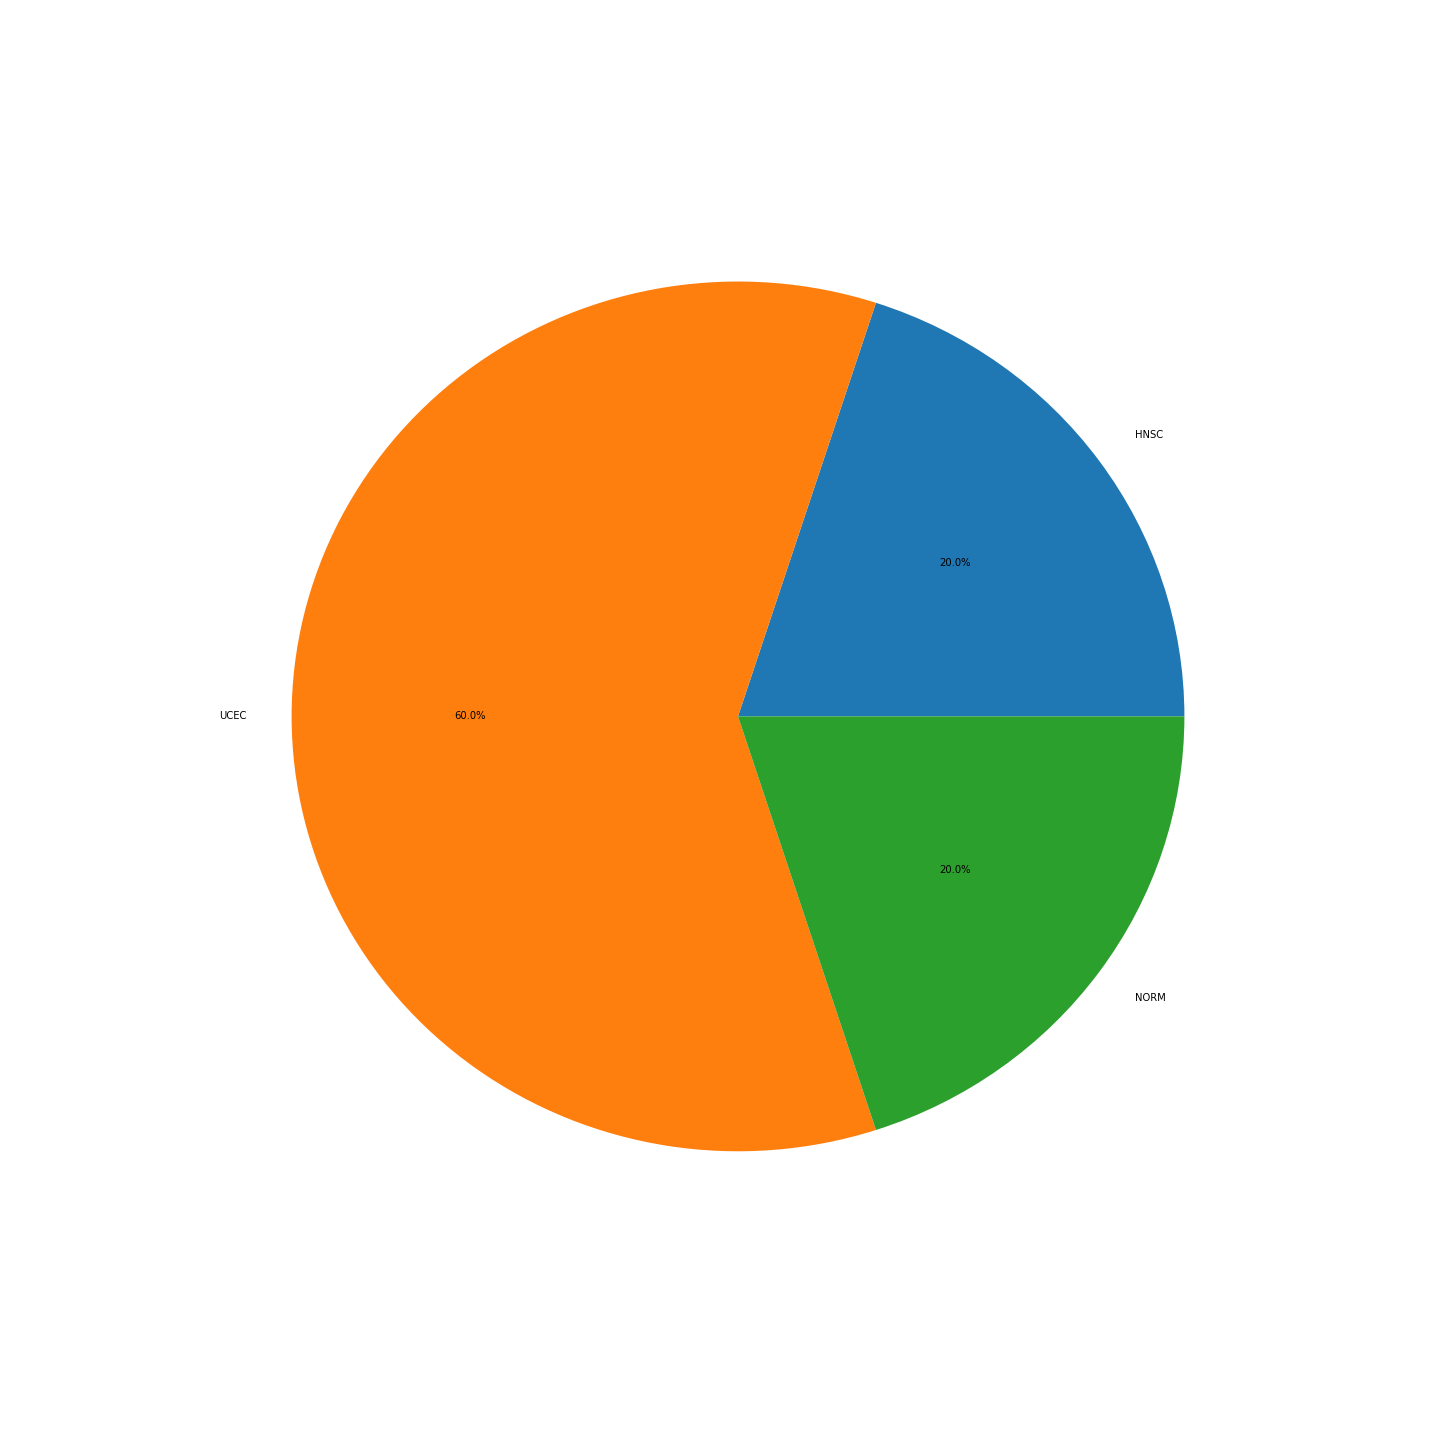


Supplementary Figure :CESC


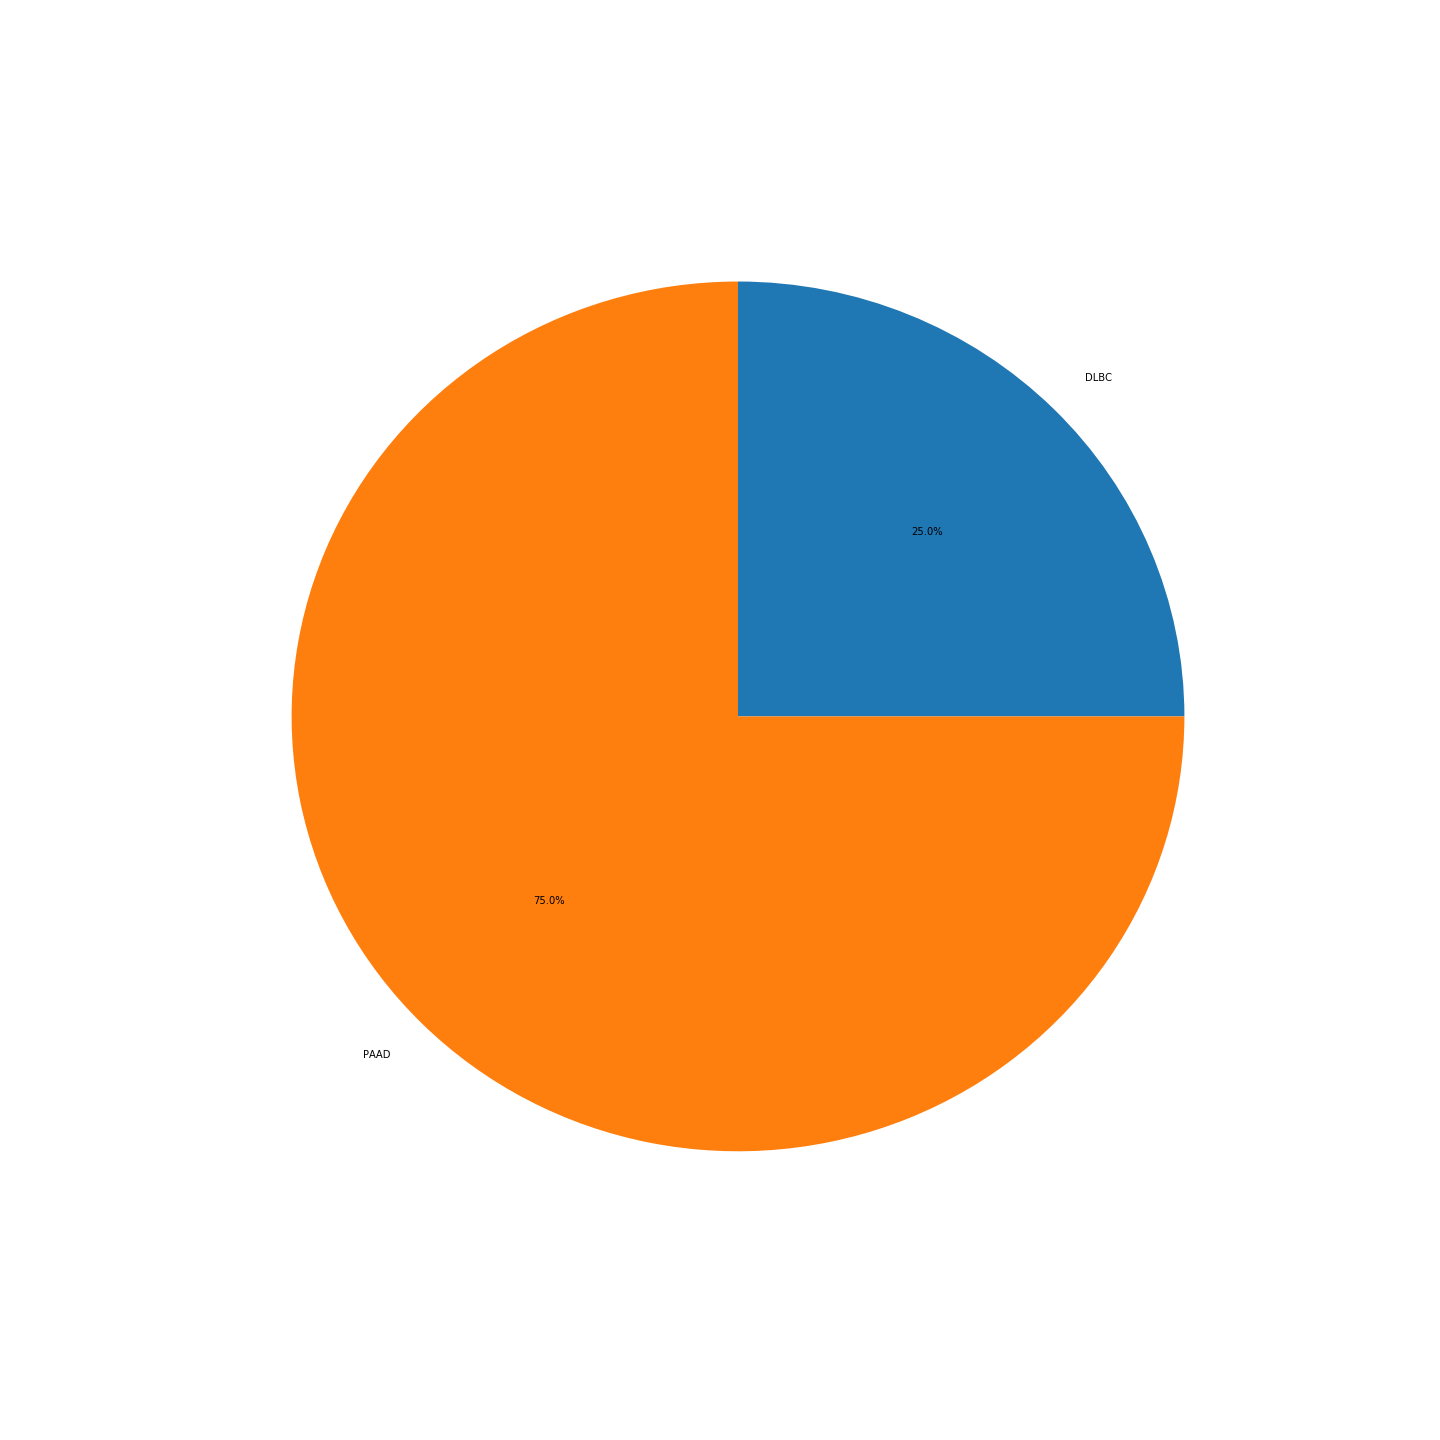


Supplementary Figure : CHOL


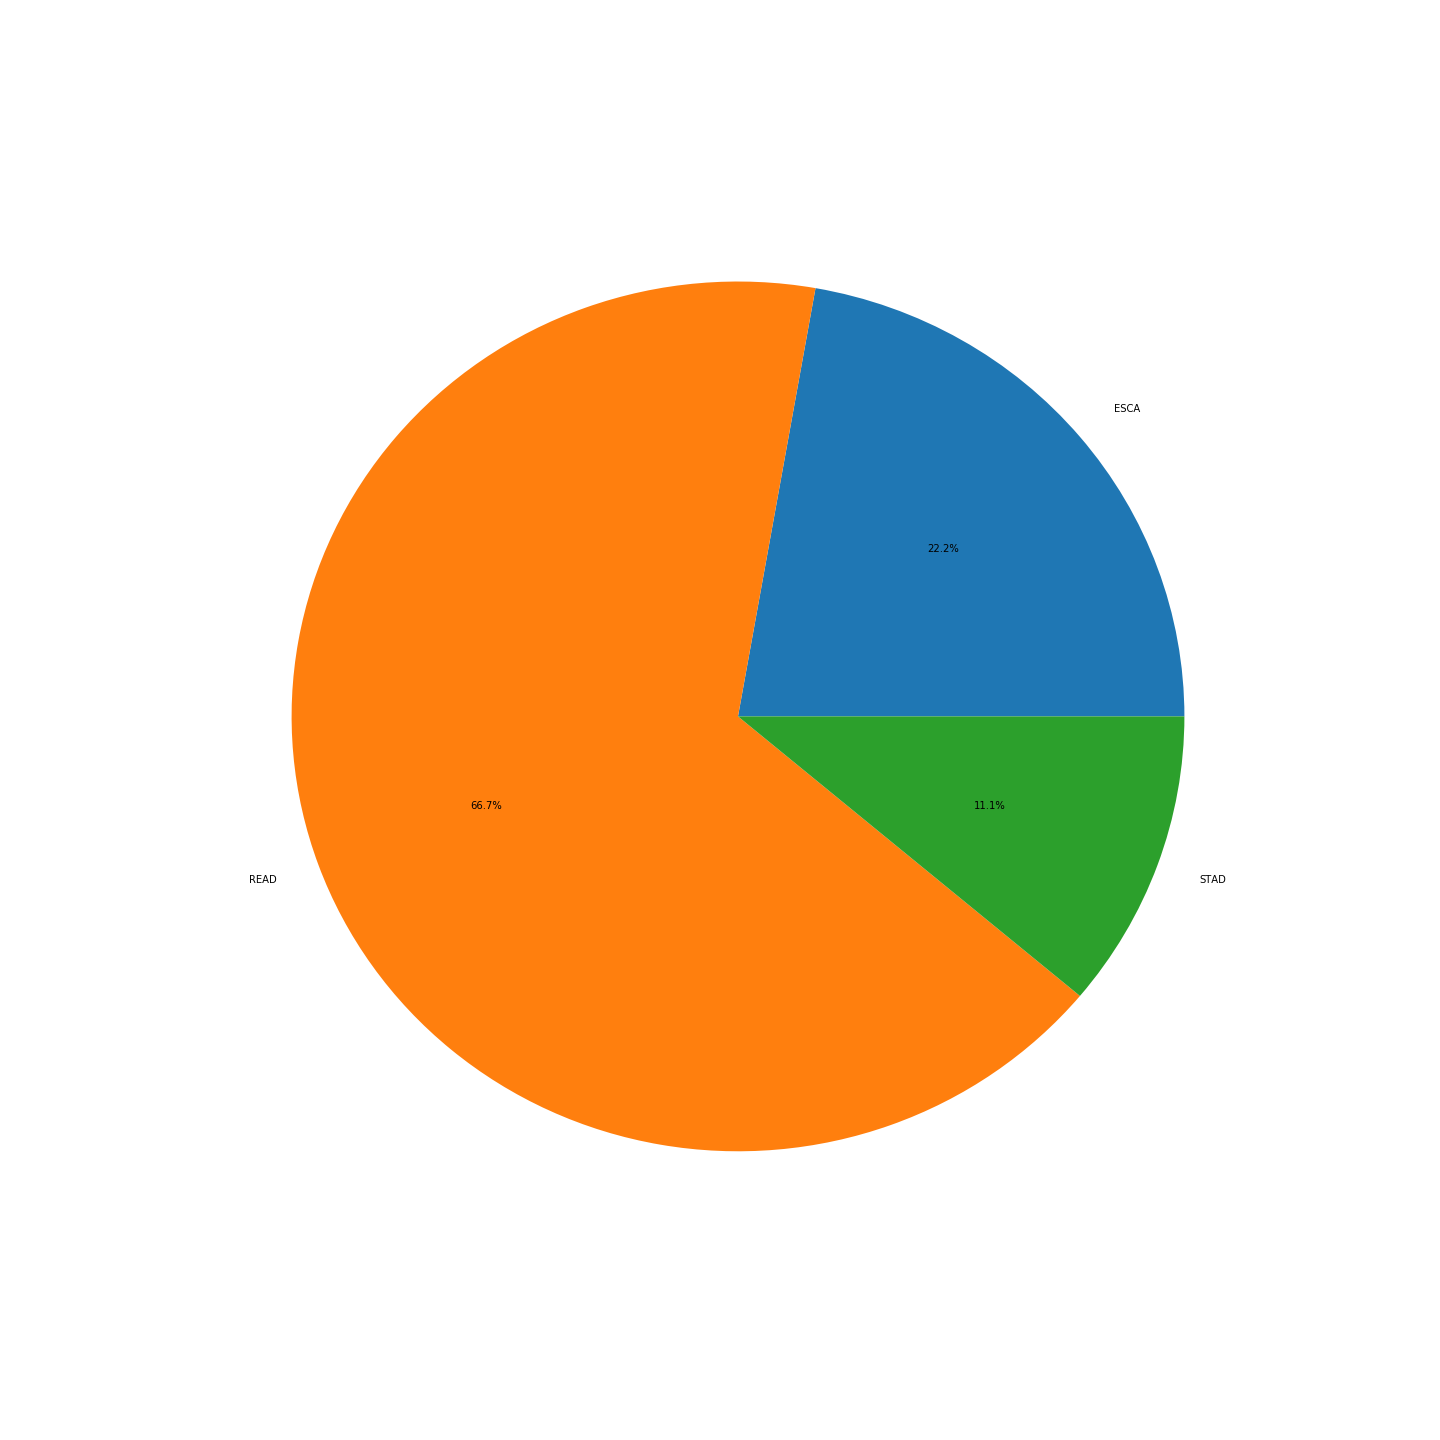


Supplementary Figure : COAD


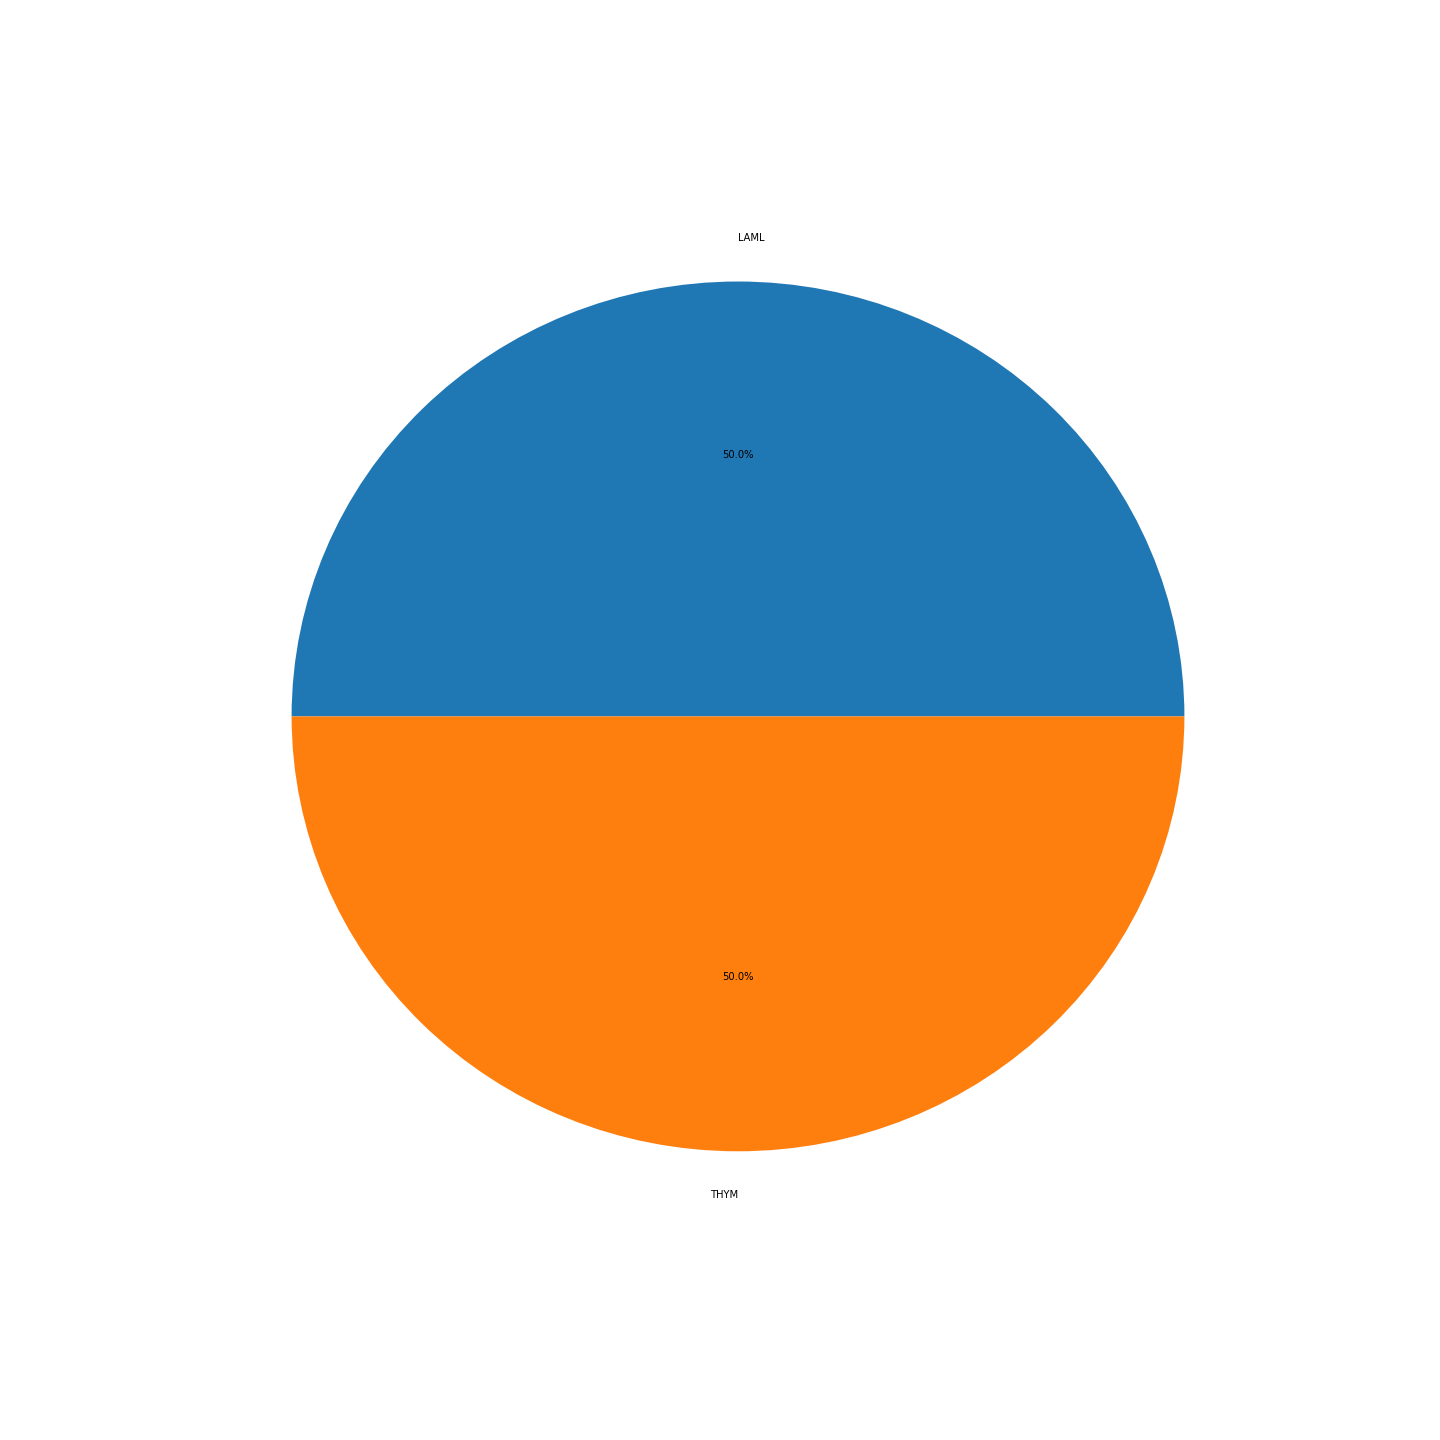


Supplementary Figure : DLBC


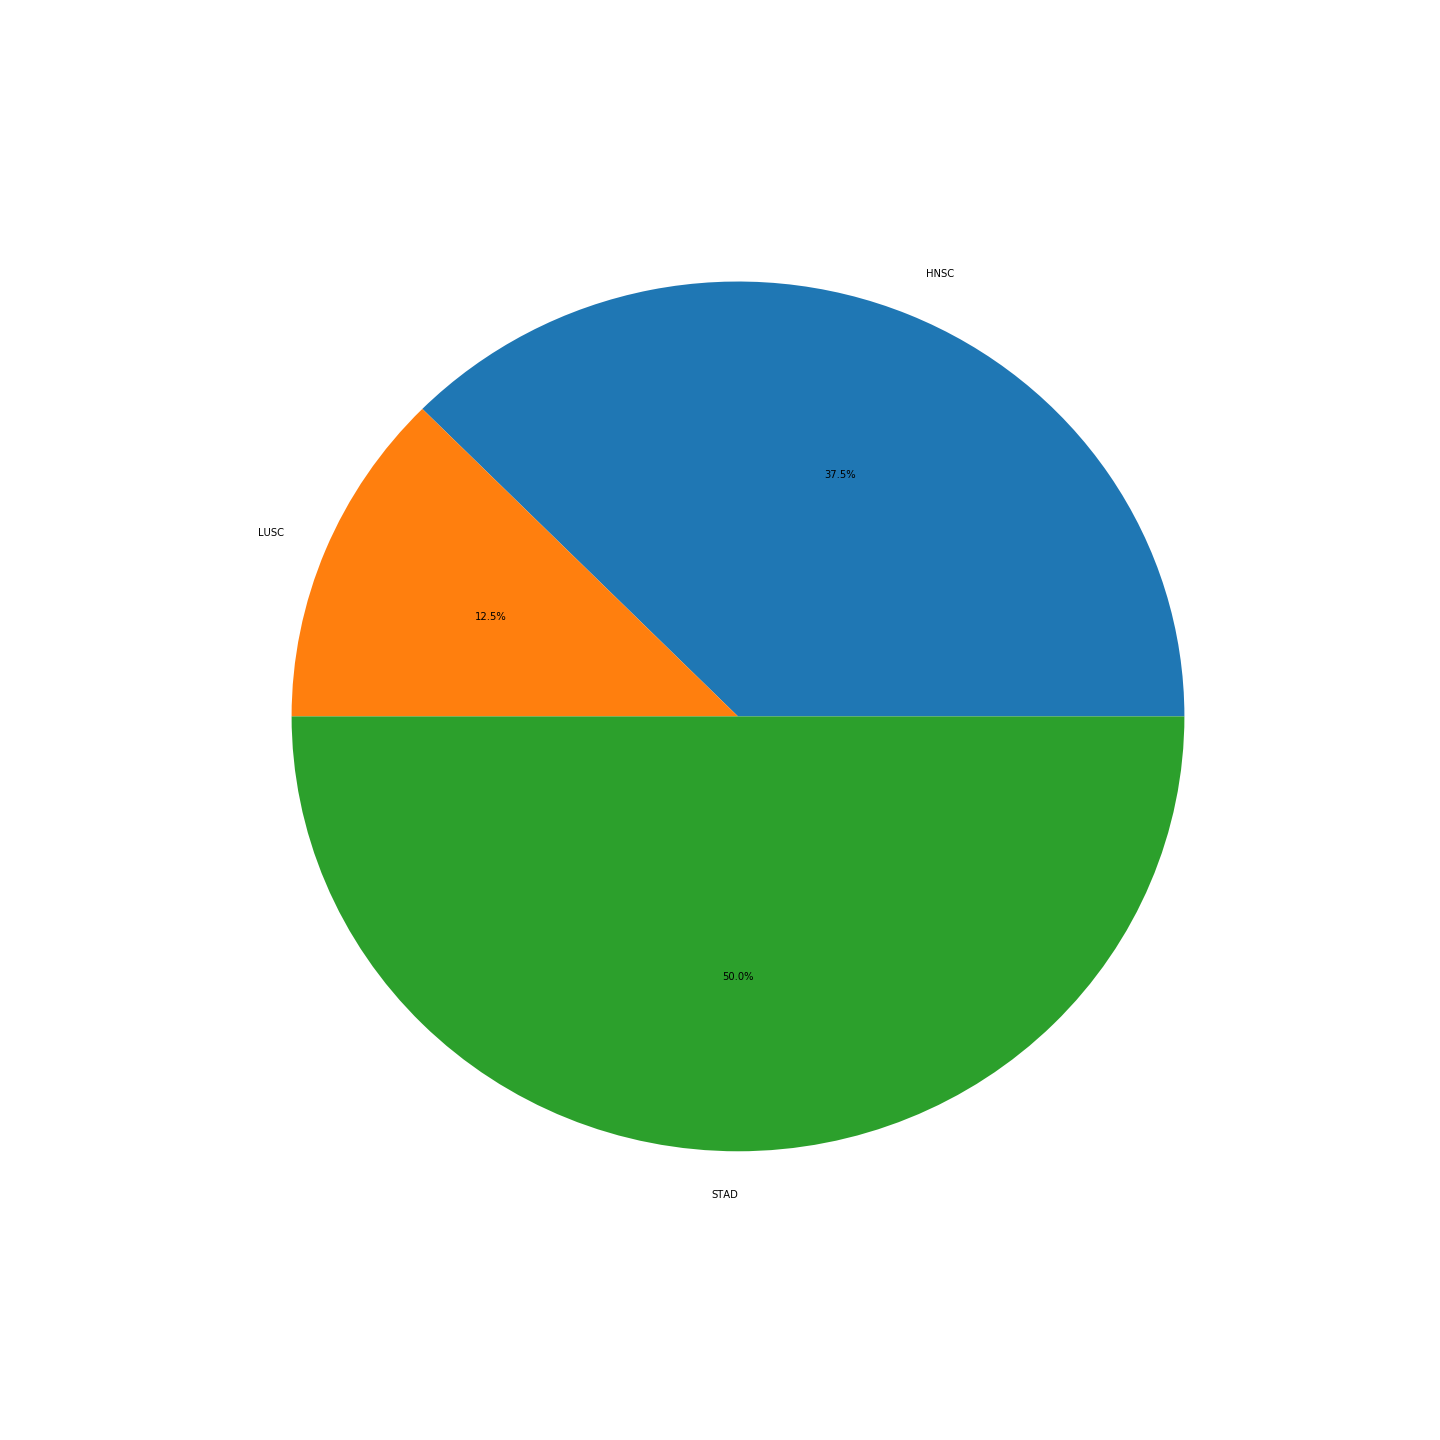


Supplementary Figure : ESCA


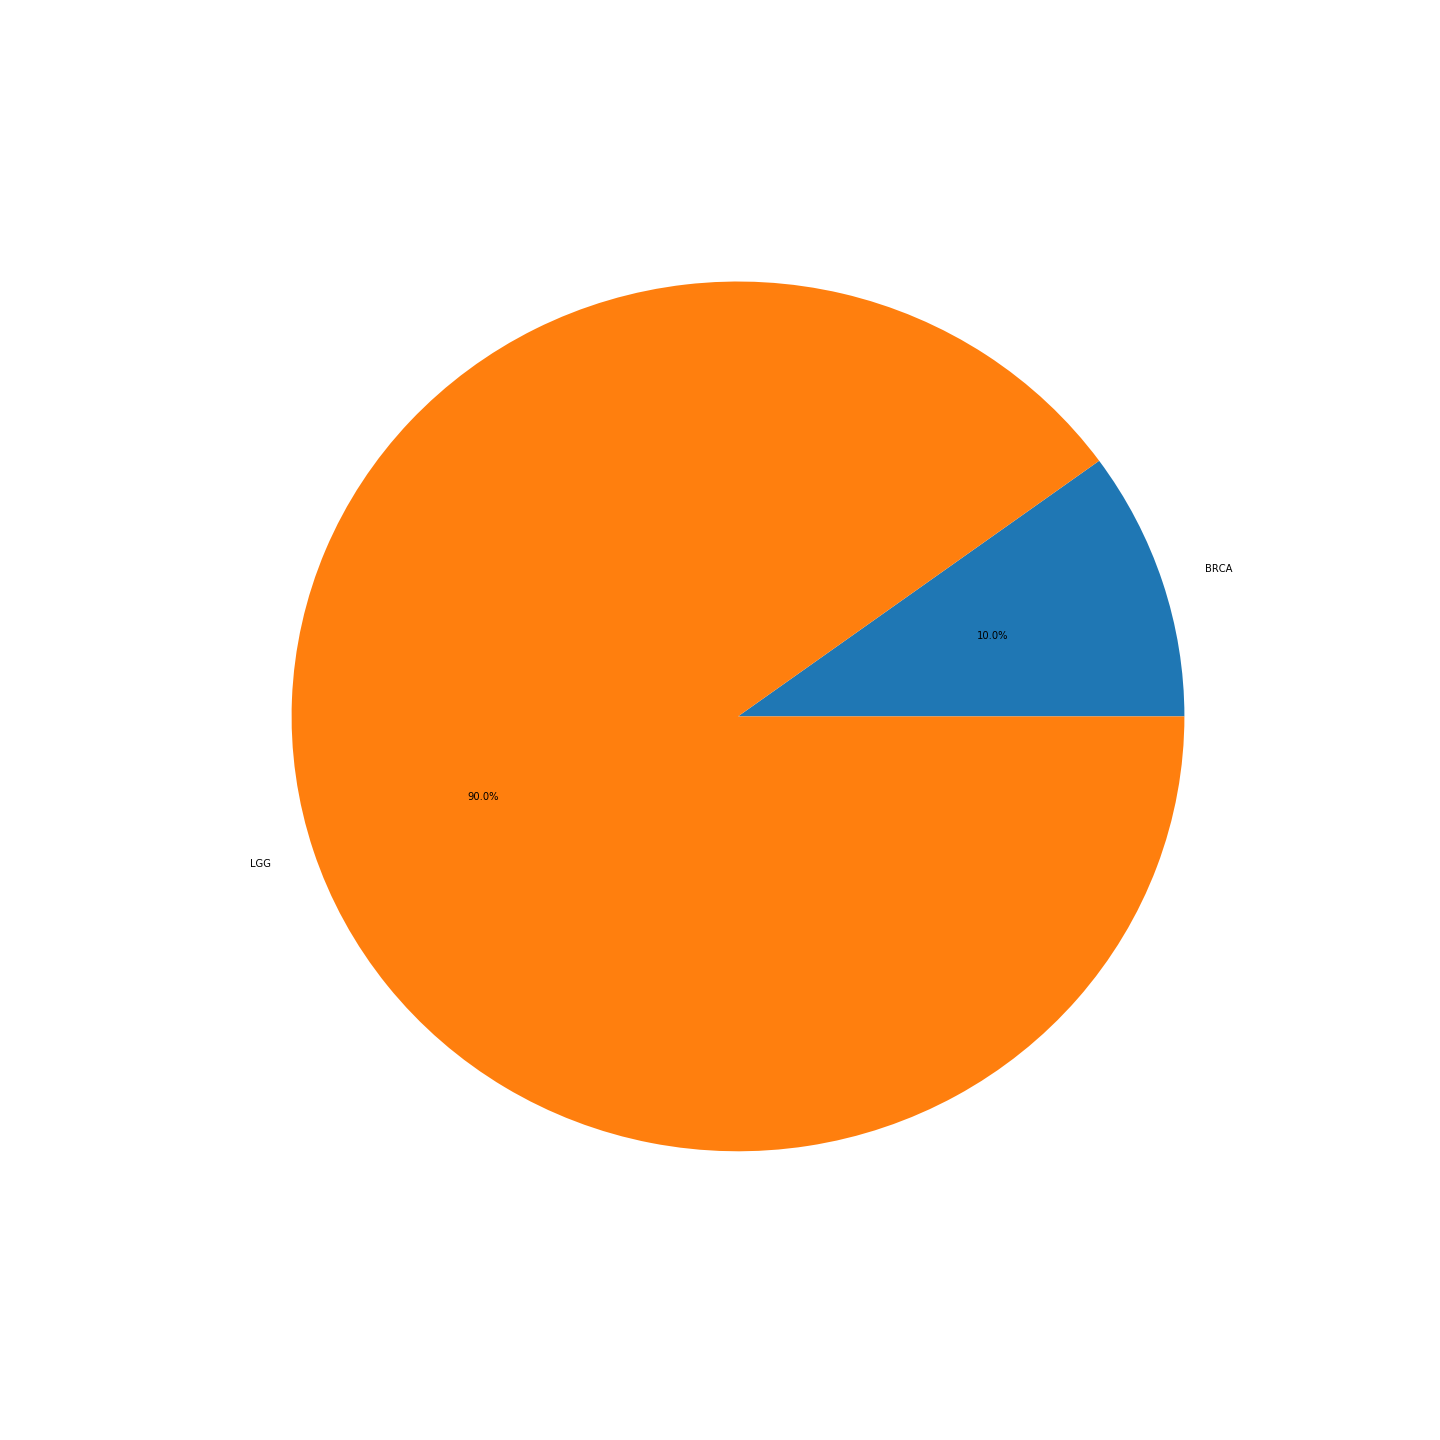


Supplementary Figure : GBM


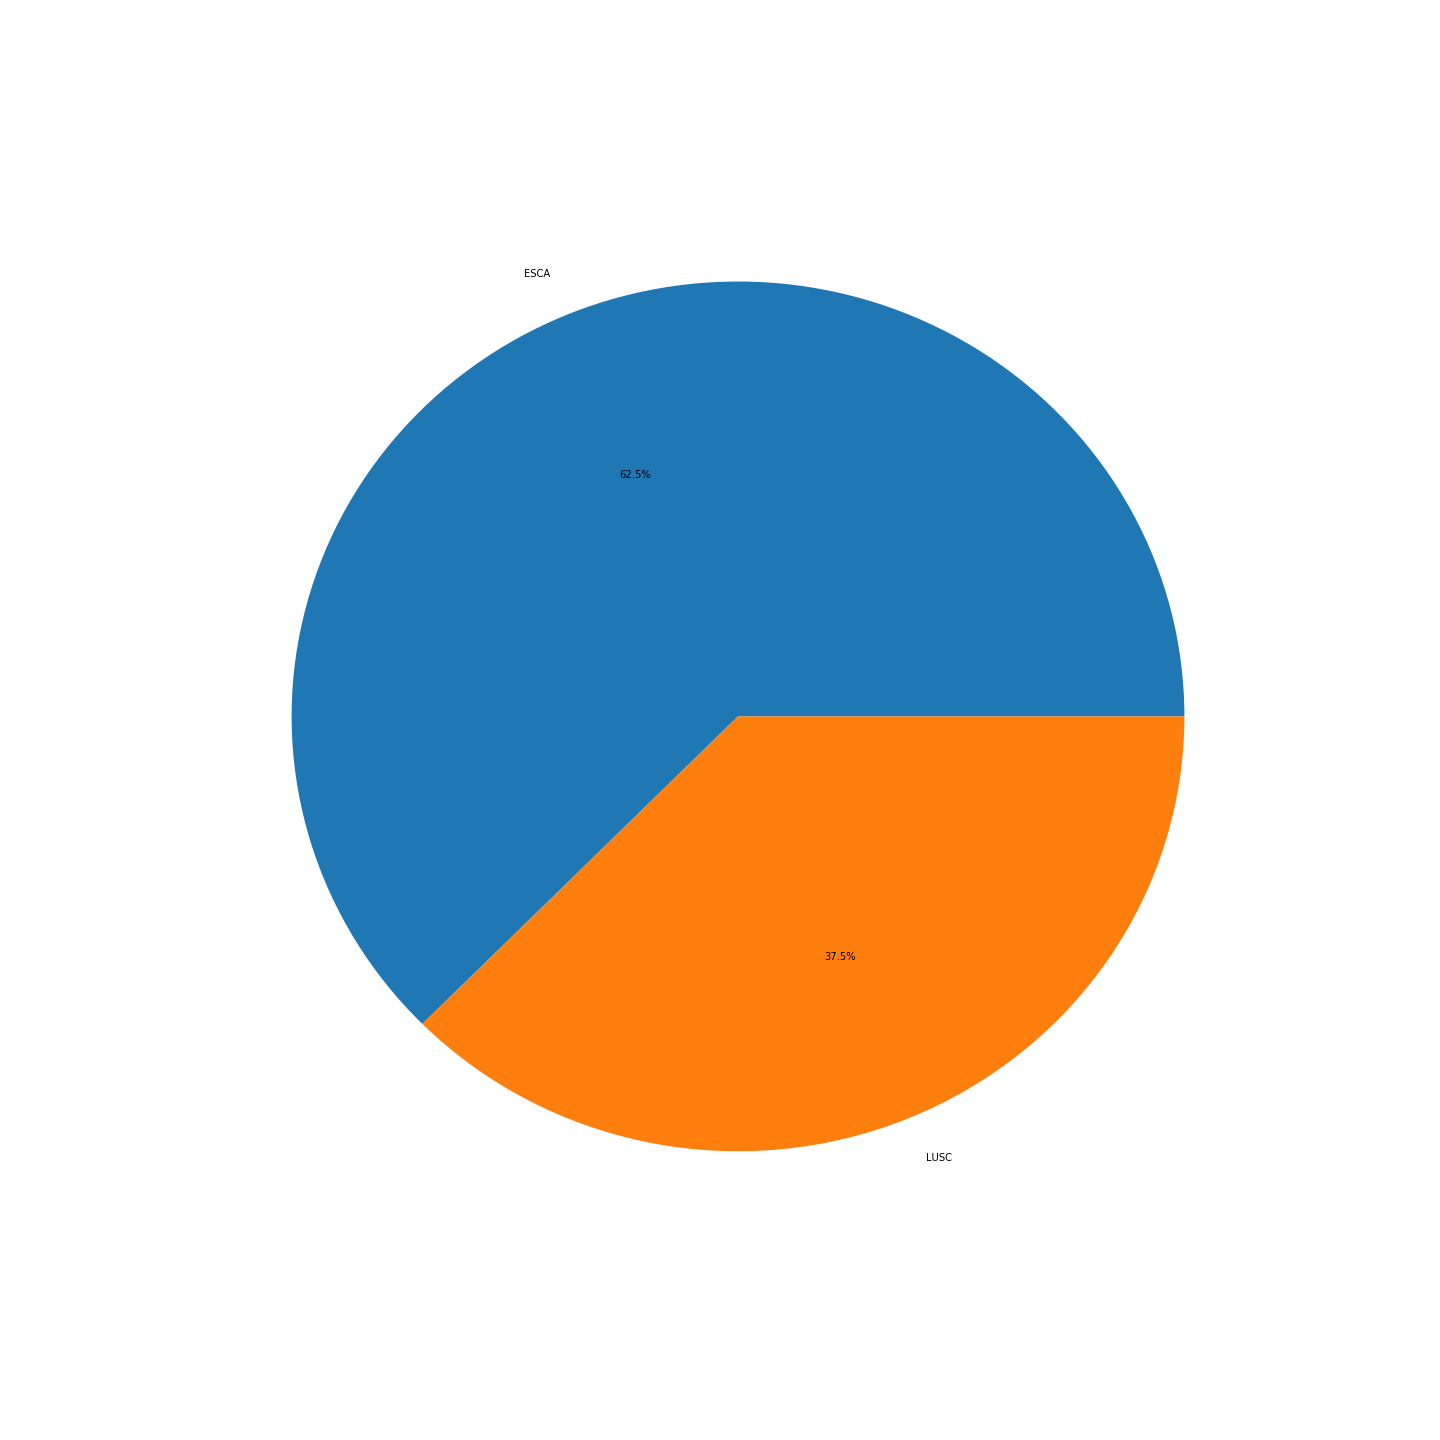


Supplementary Figure : HNSC


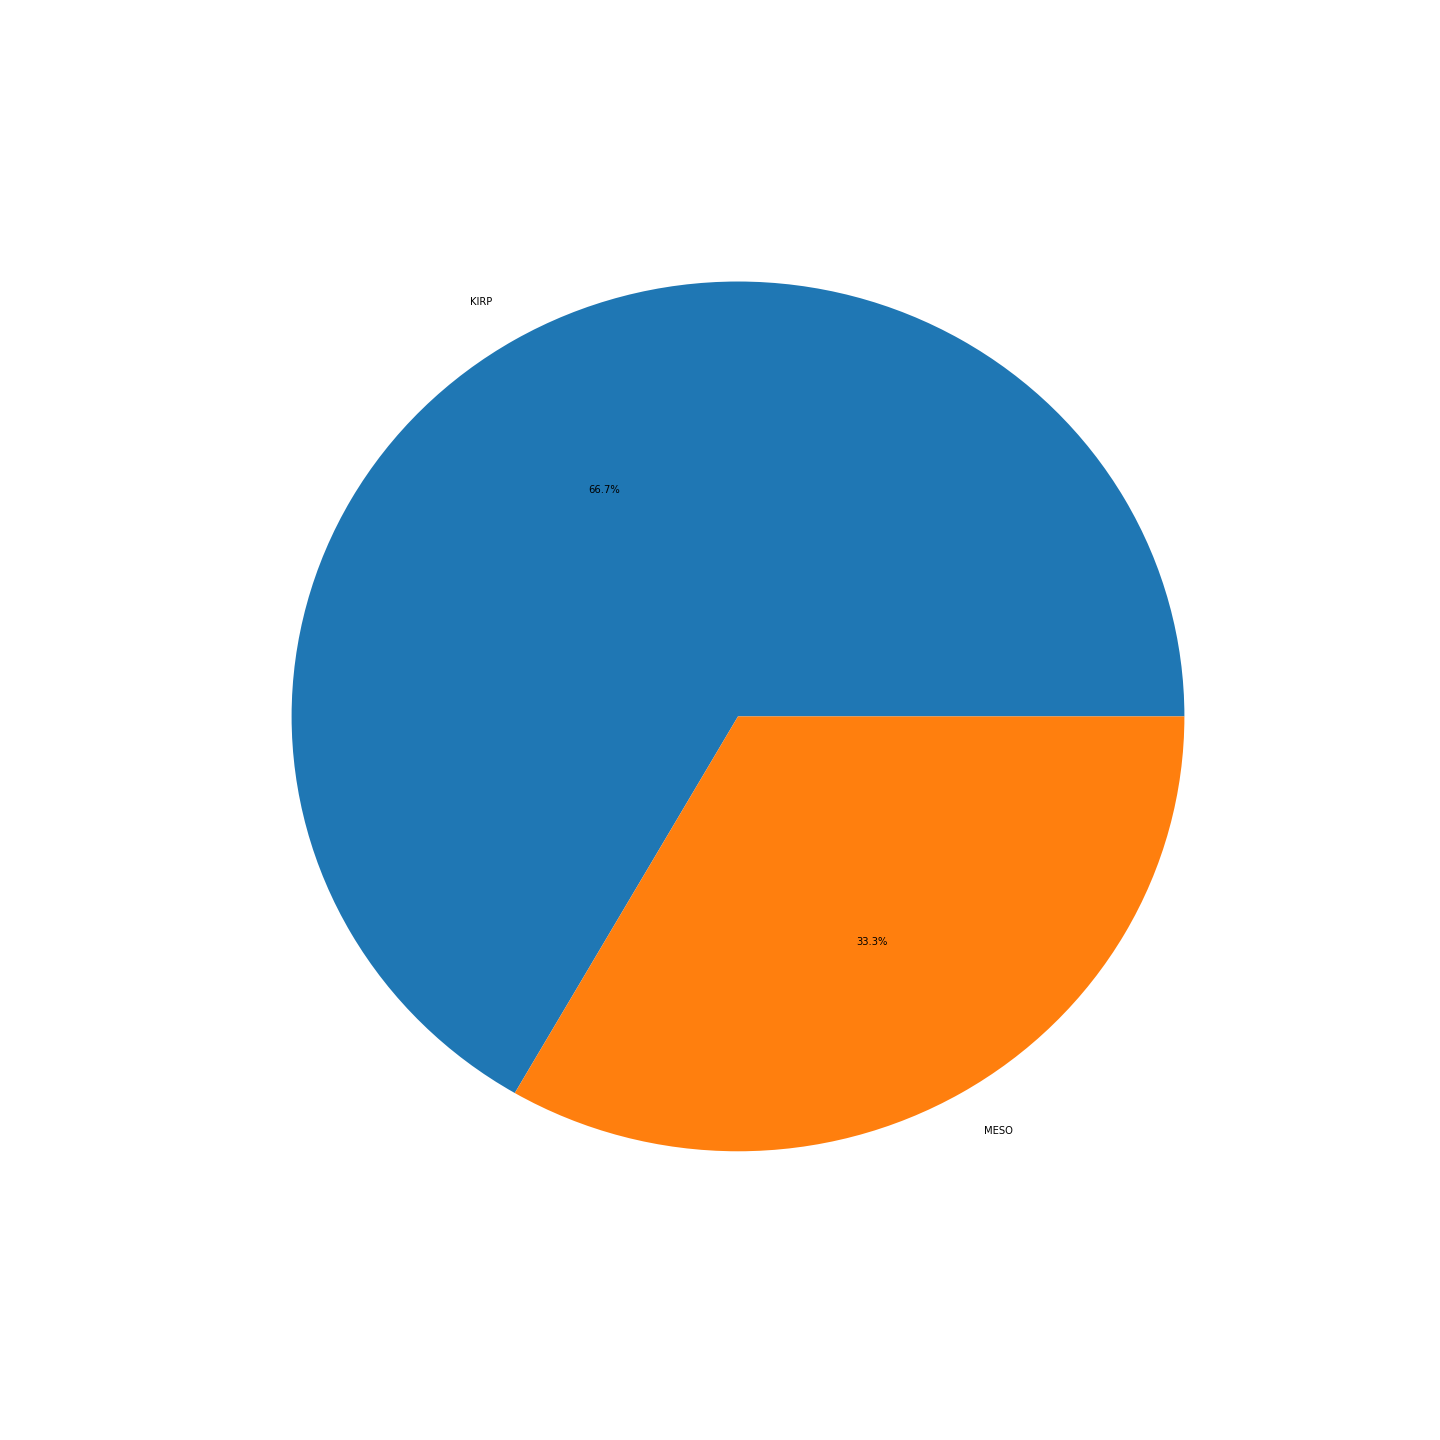


Supplementary Figure : KIRC


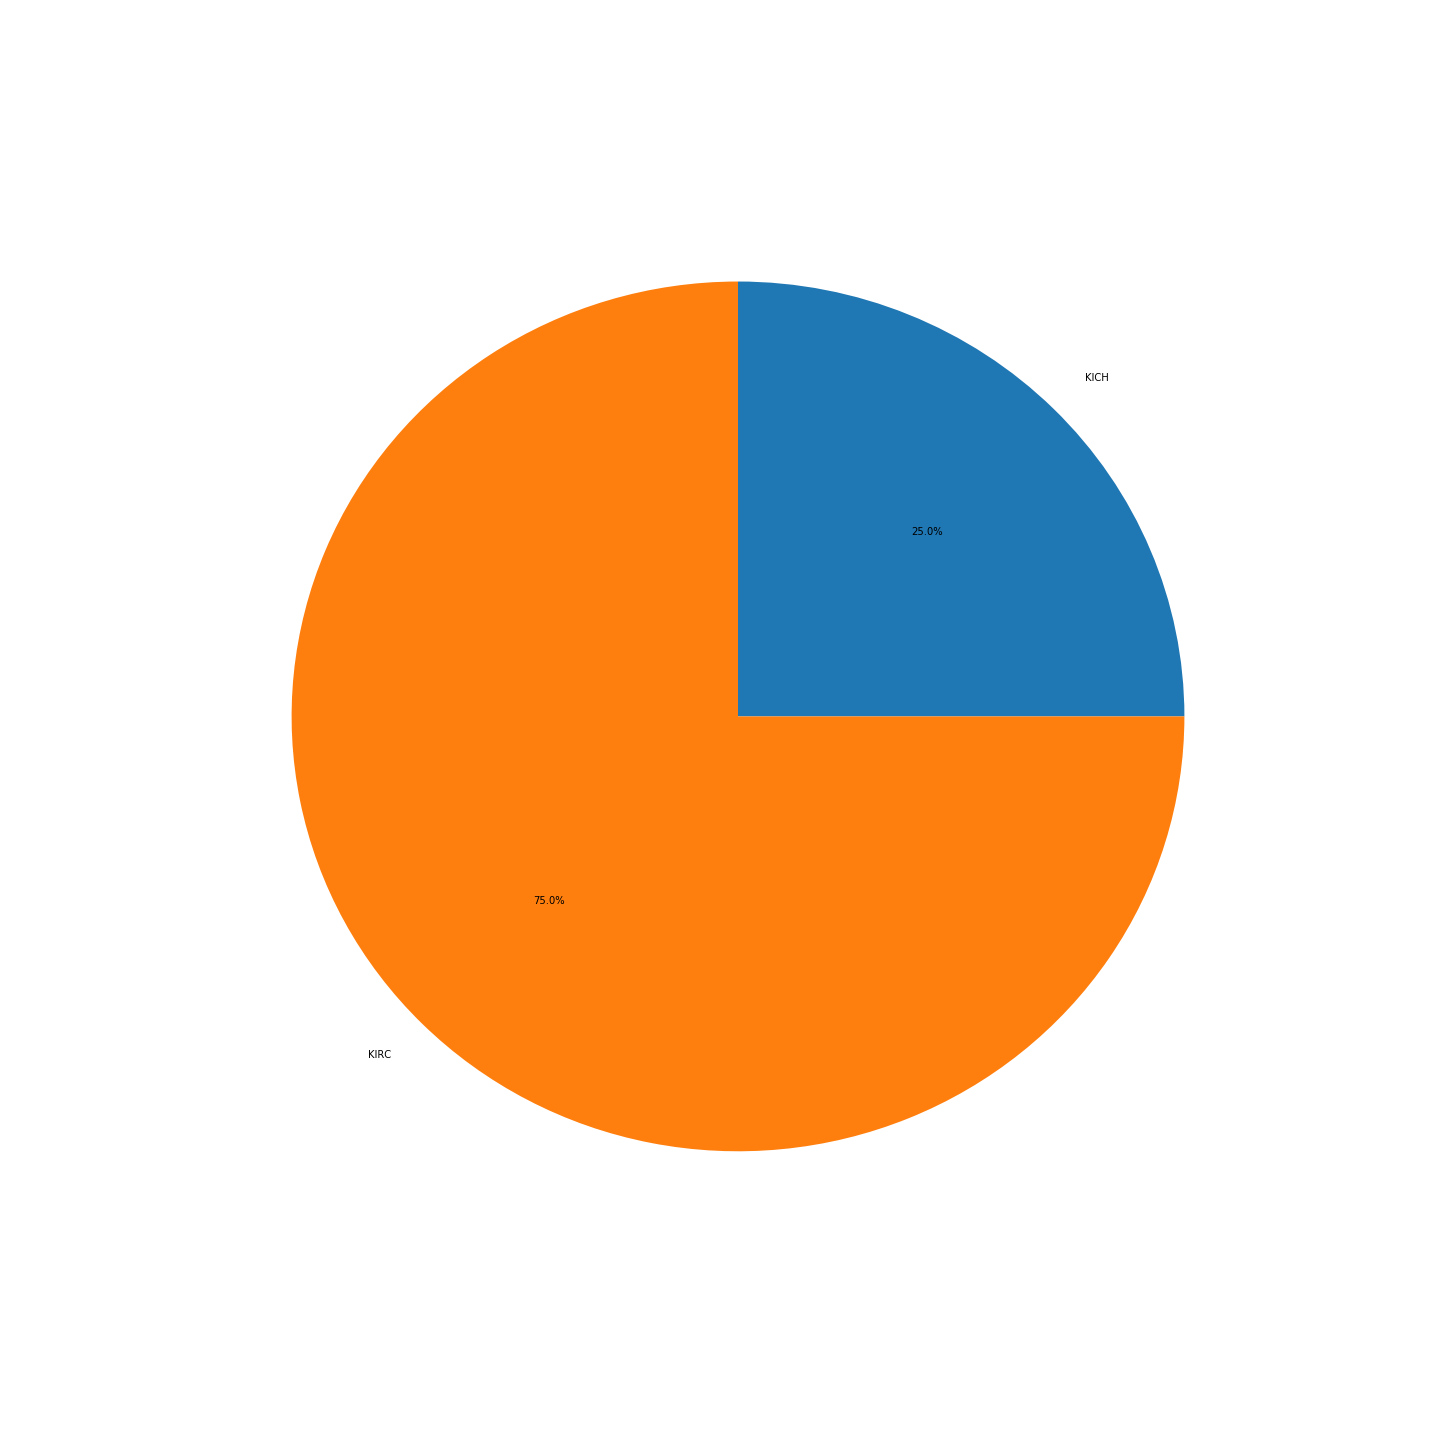


Supplementary Figure : KIRP


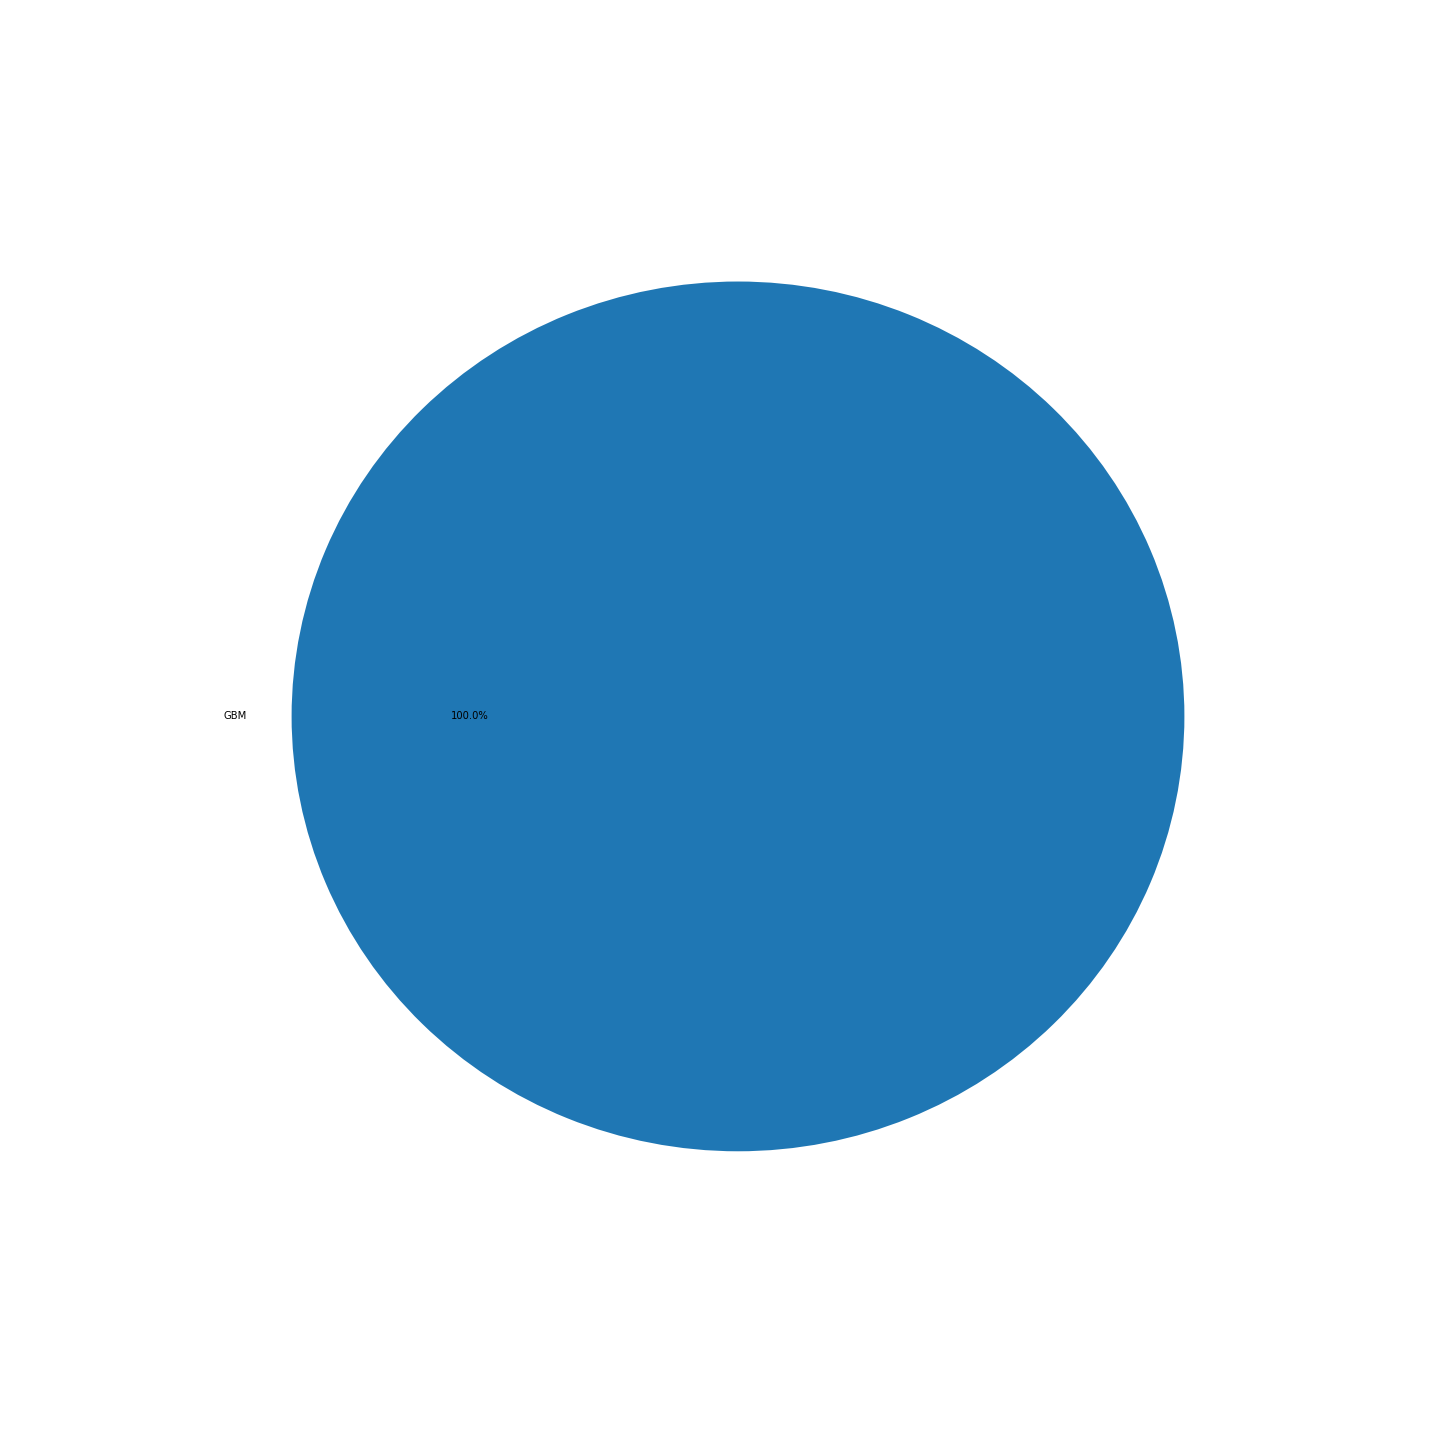


Supplementary Figure :LGG


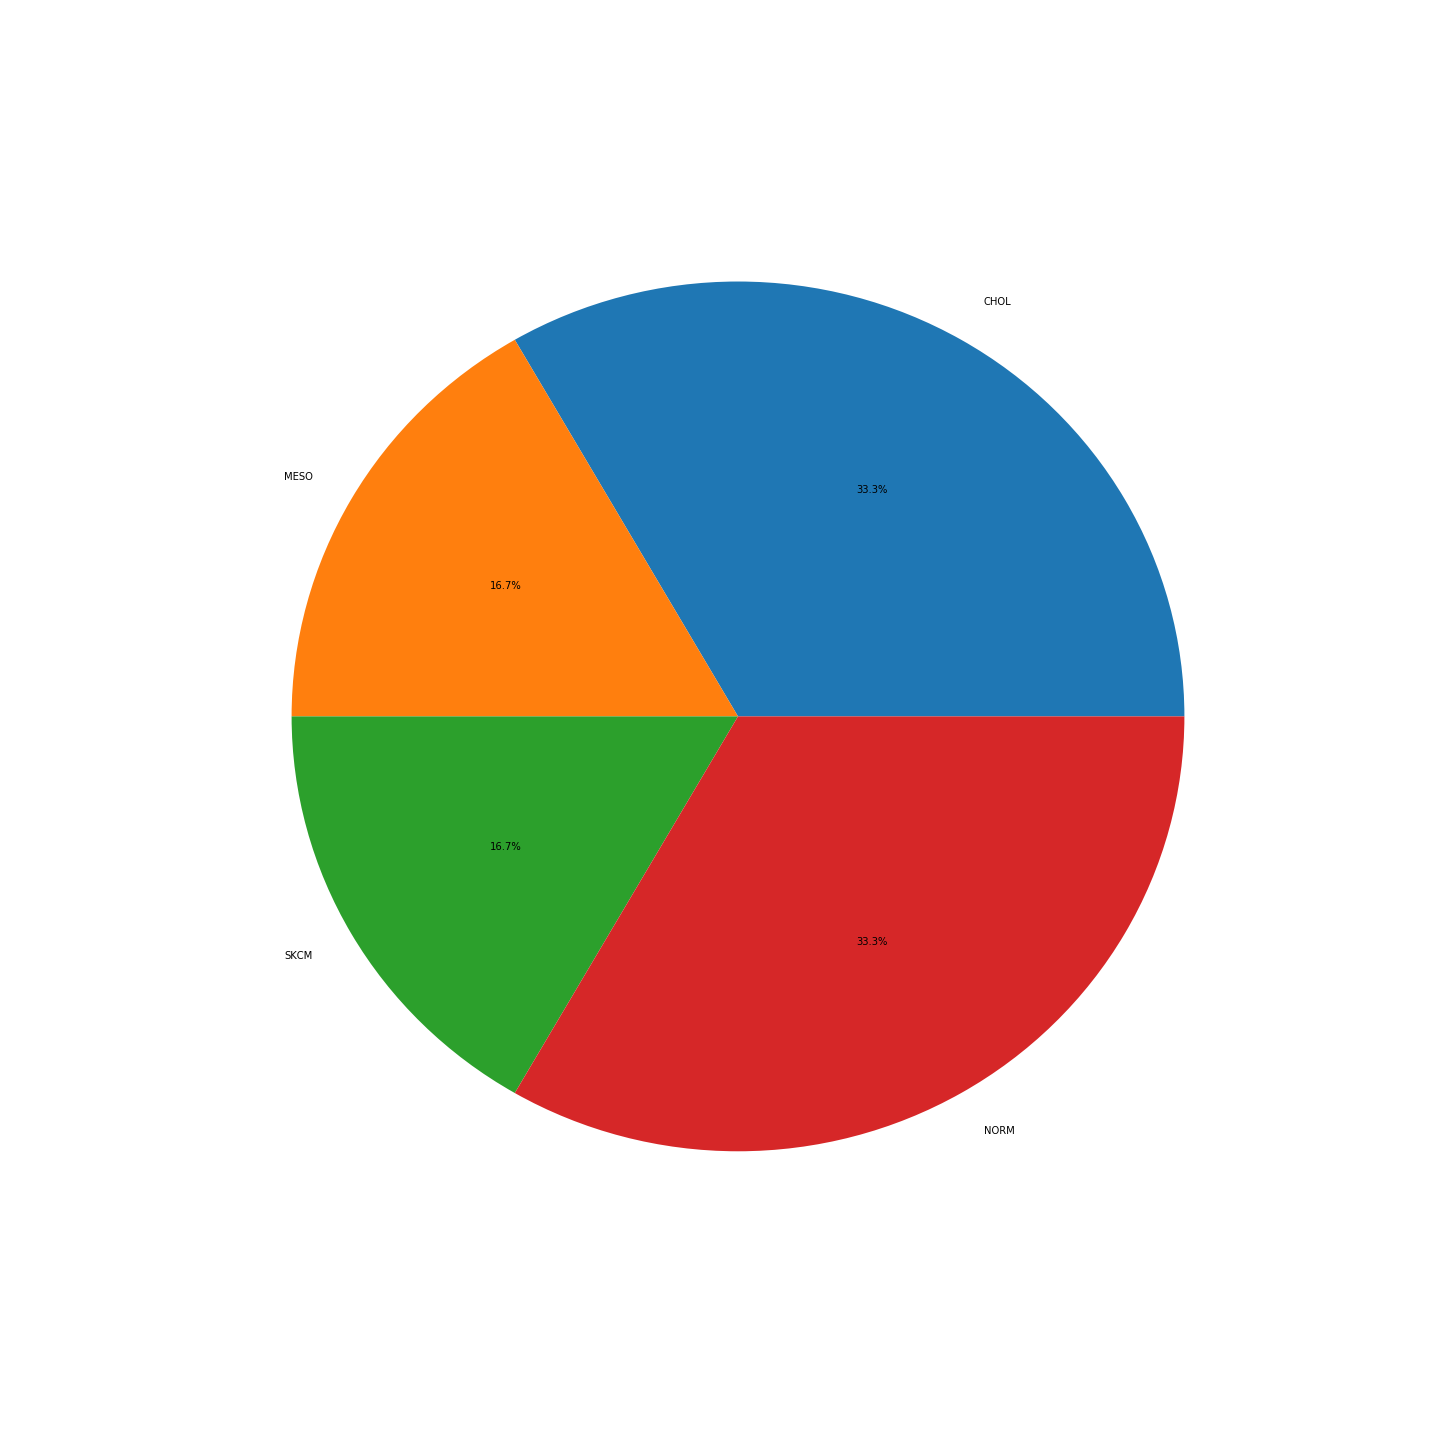


Supplementary Figure : LIHC


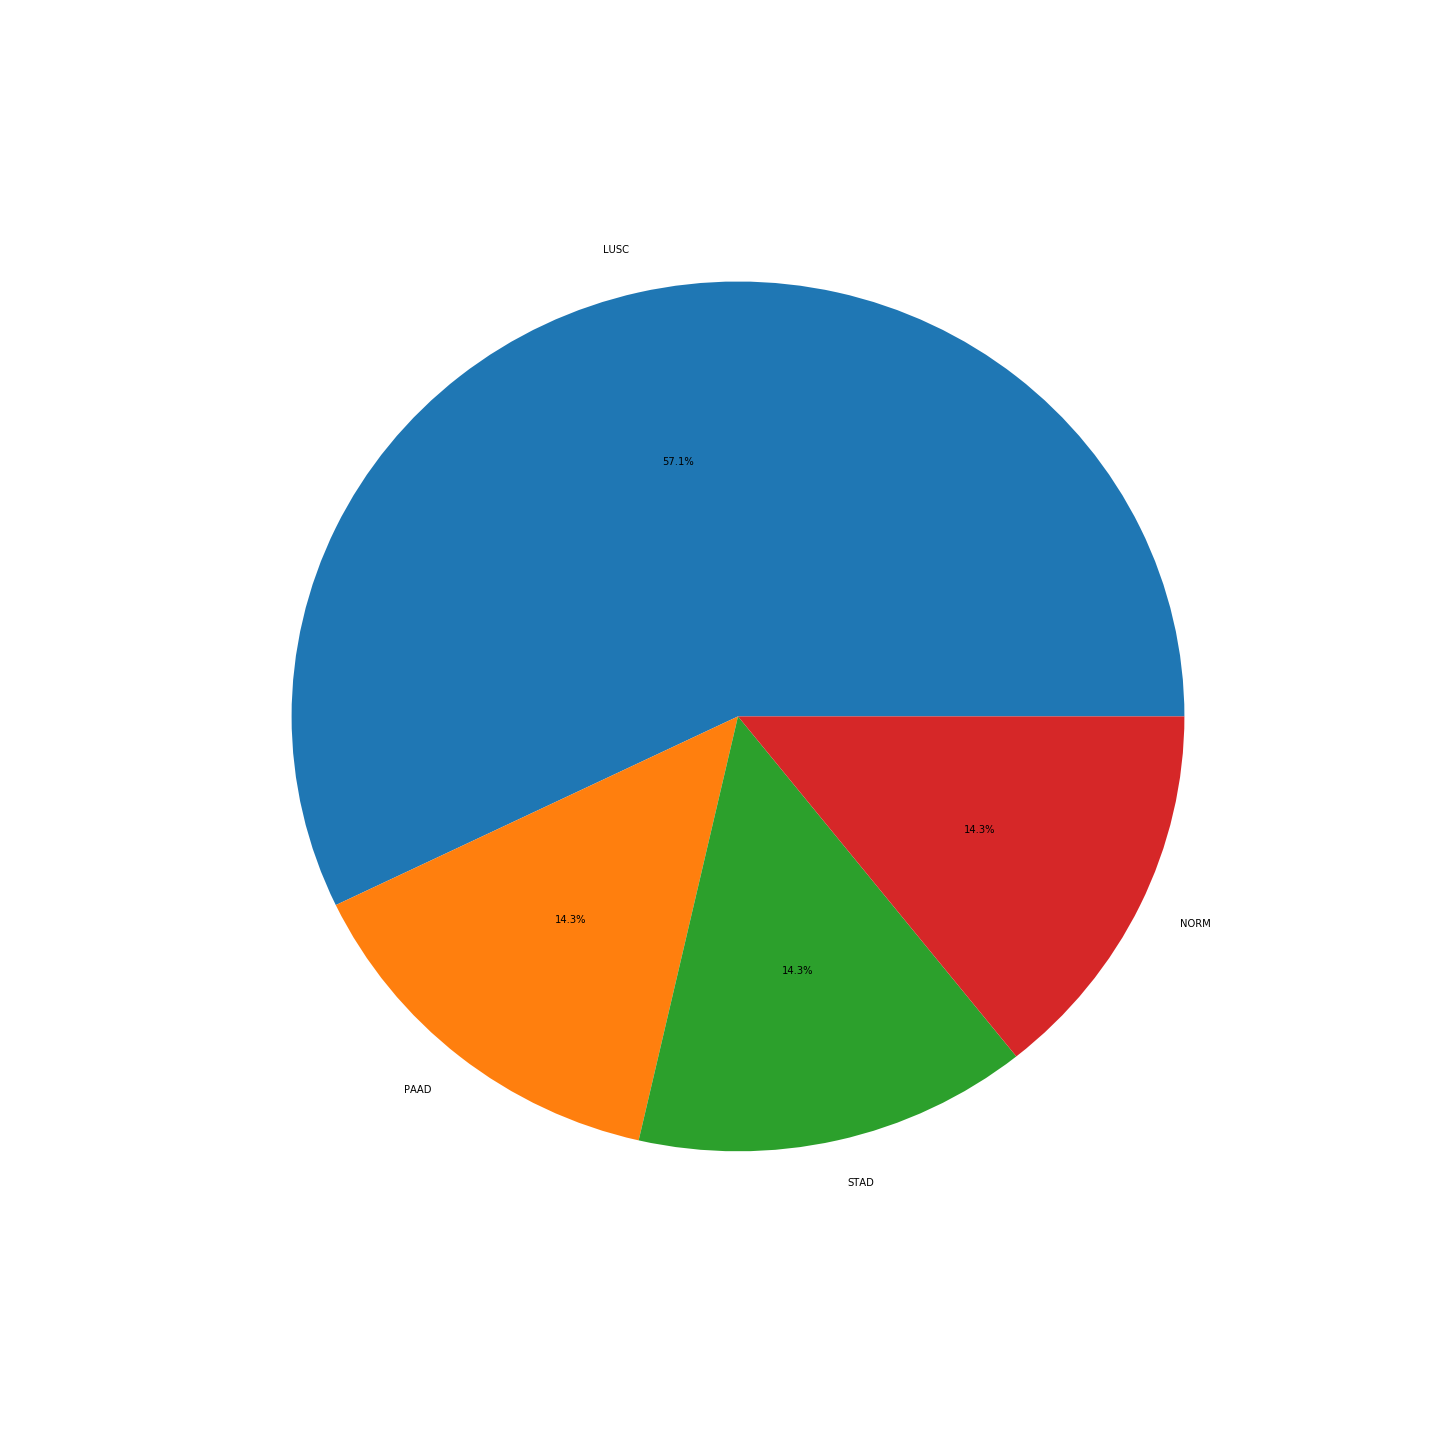


Supplementary Figure :LUAD


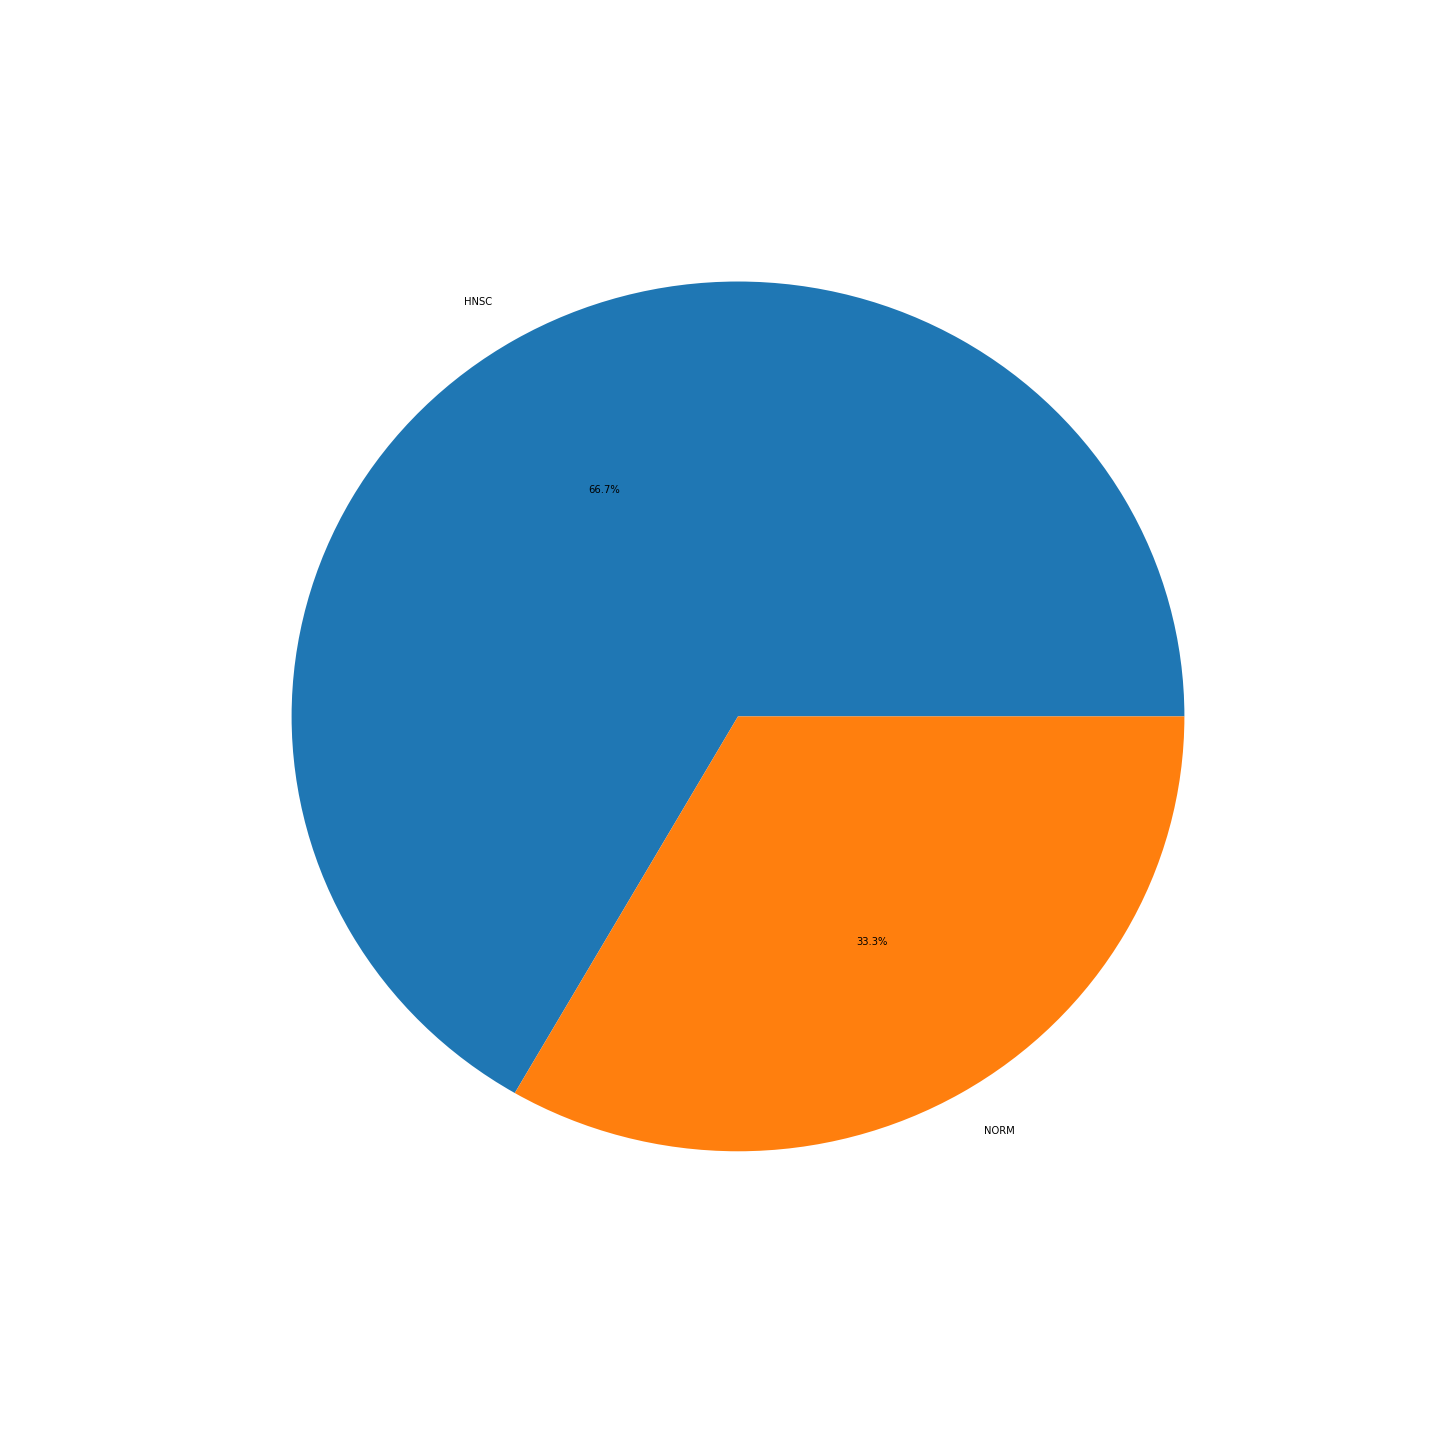


Supplementary Figure : LUSC


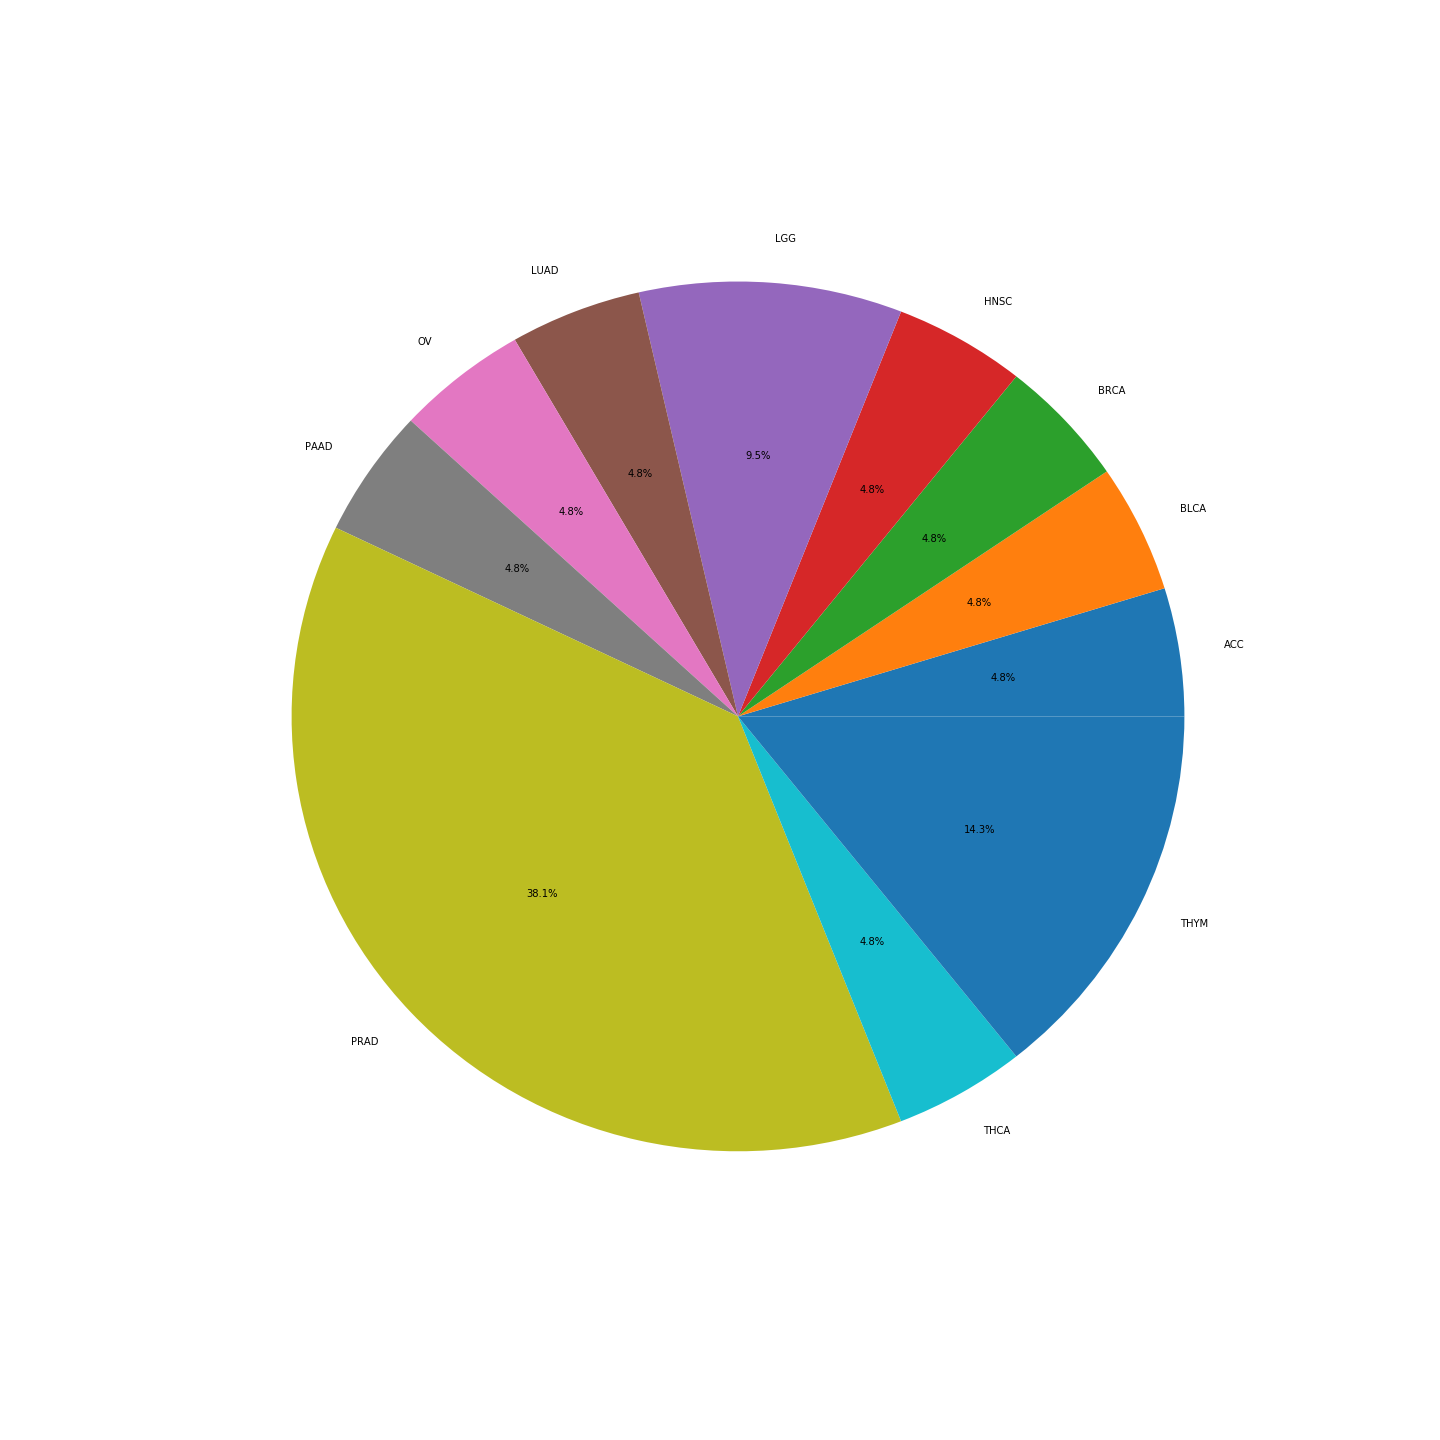


Supplementary Figure : NORM


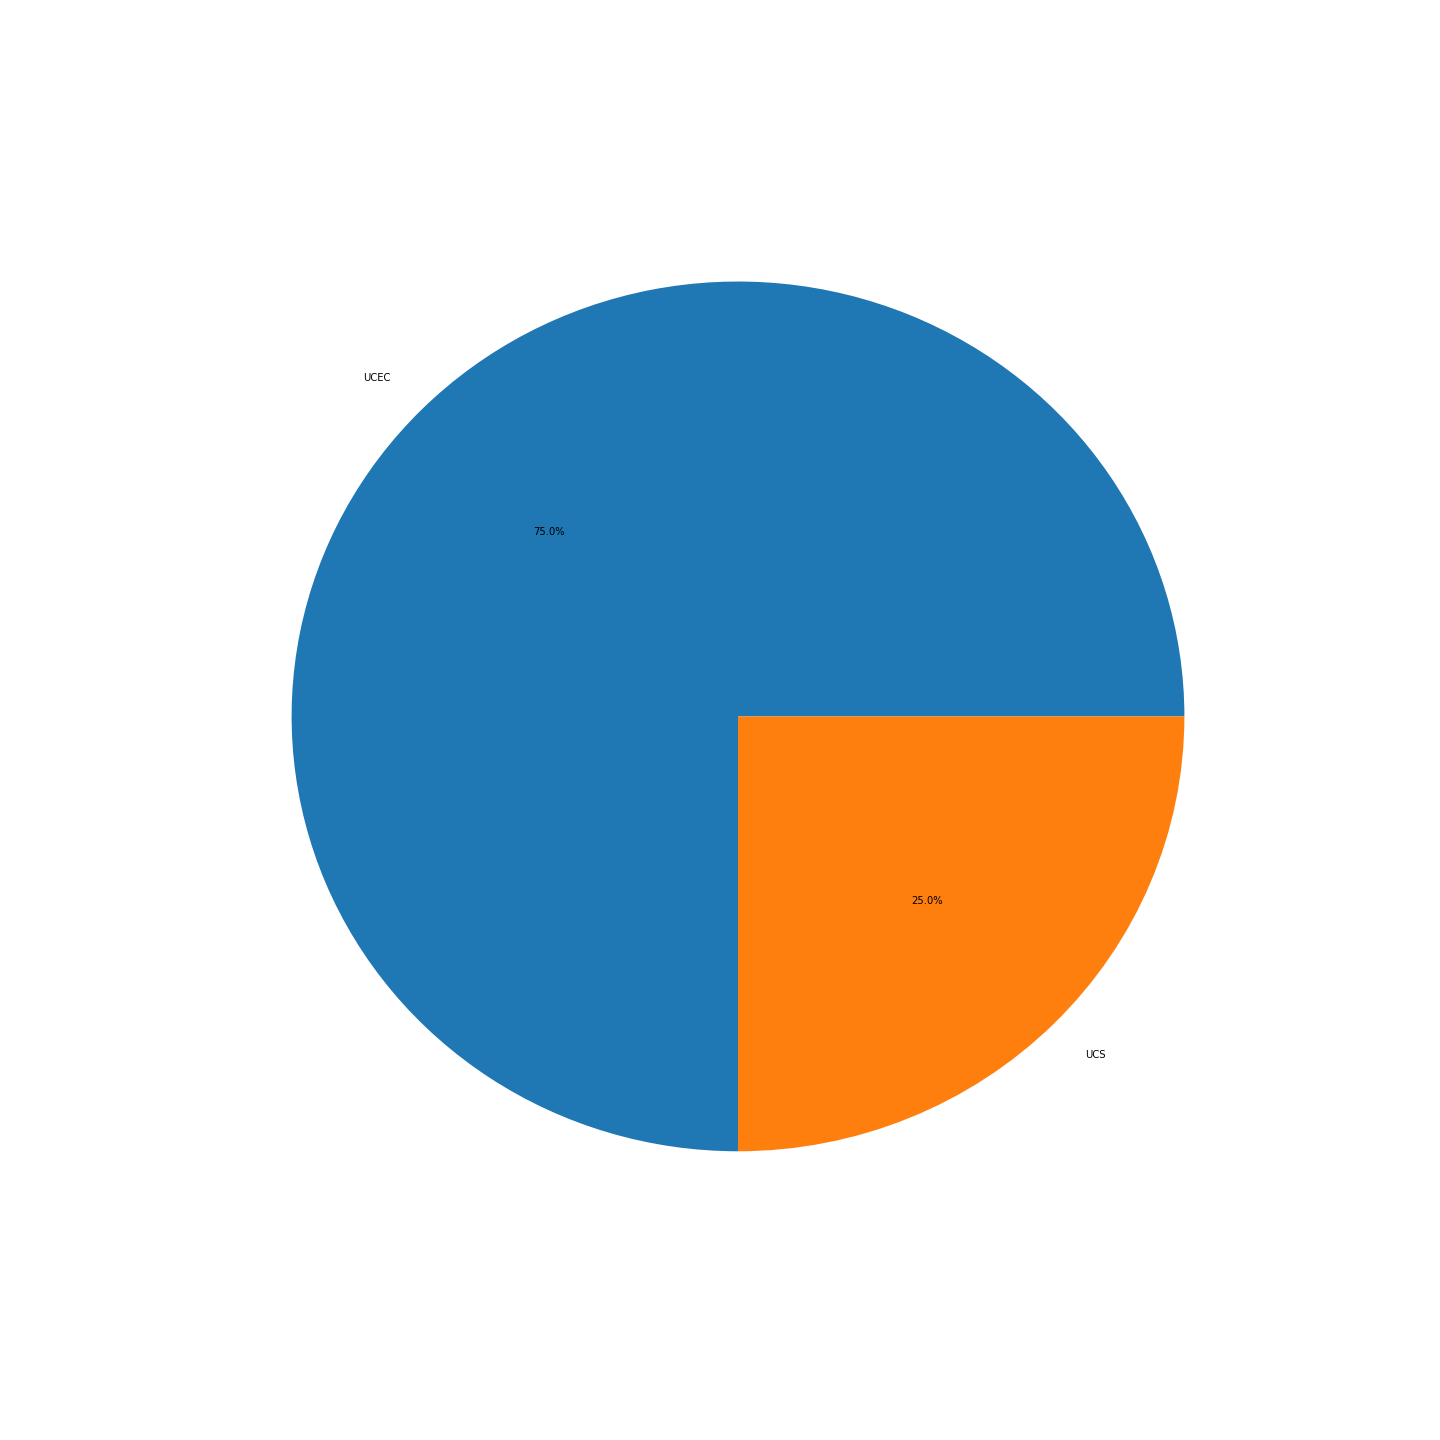


Supplementary Figure : OV


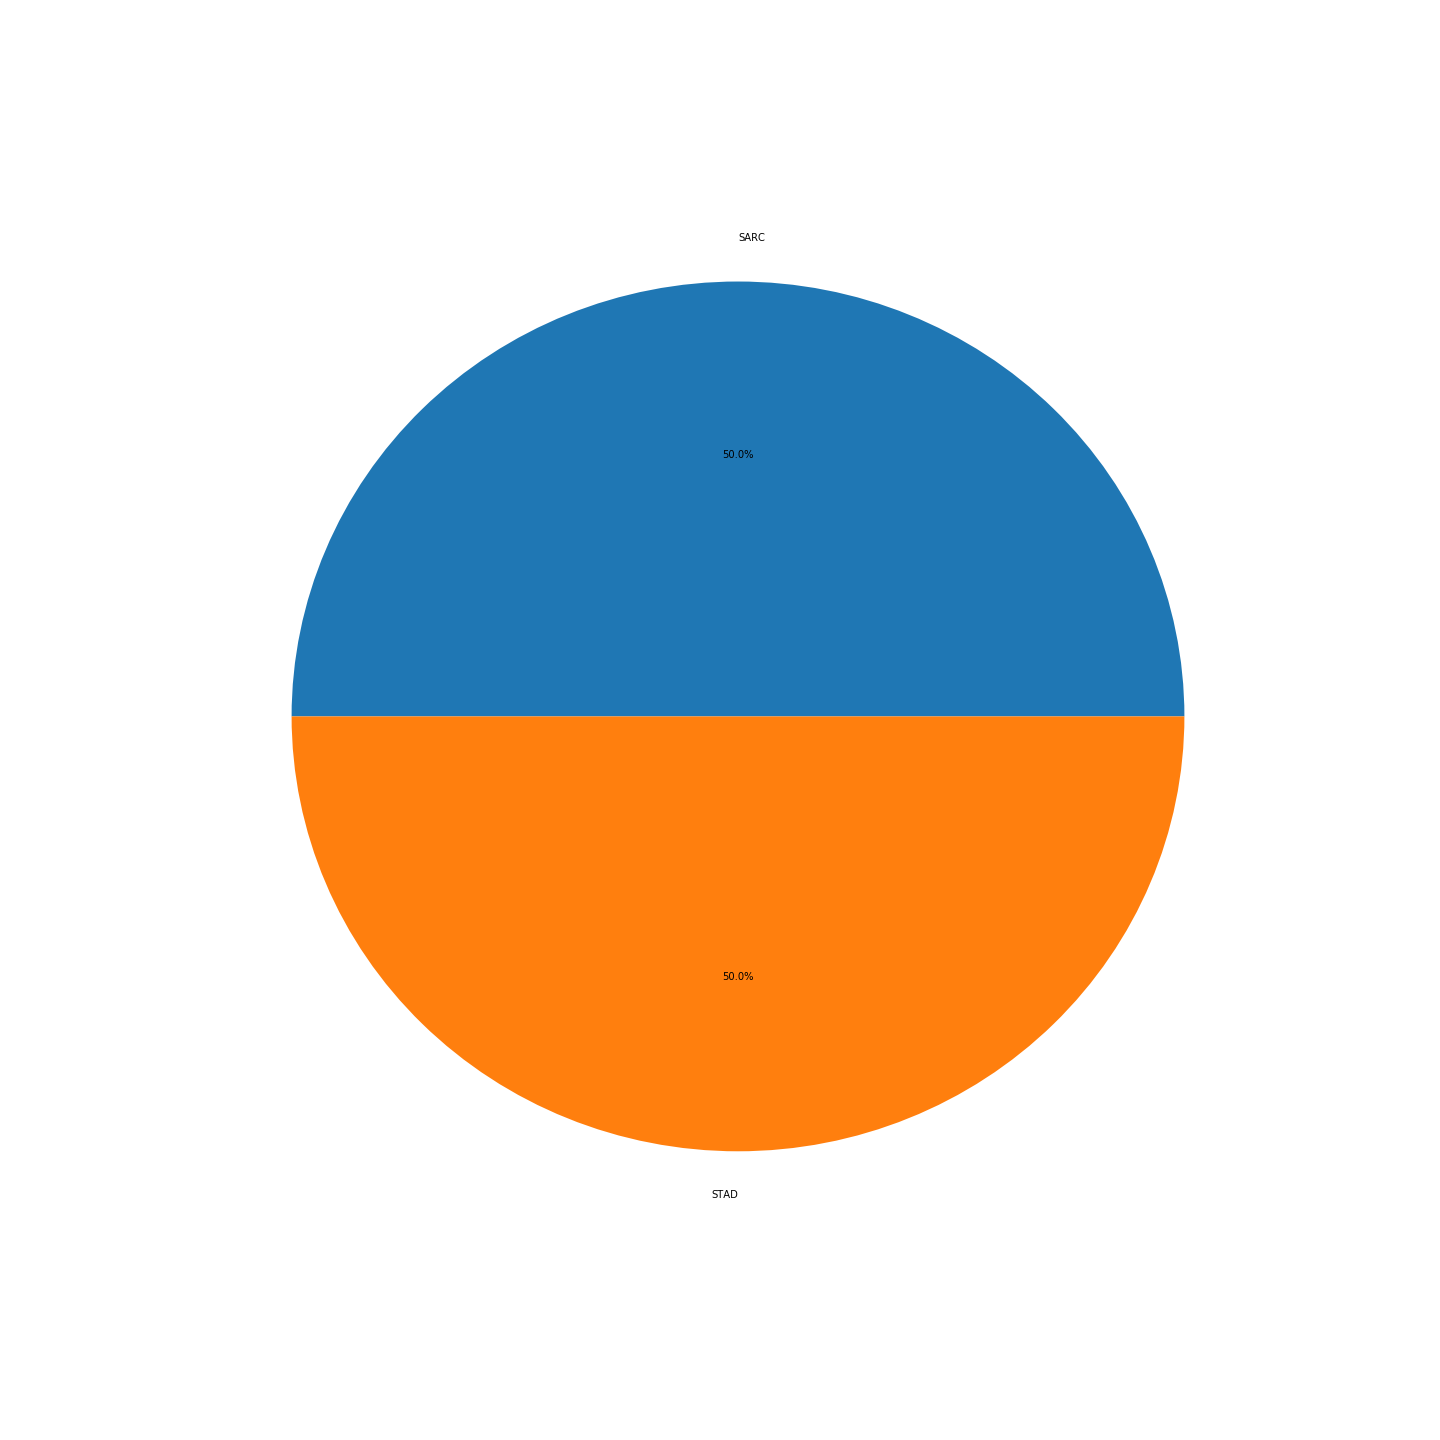


Supplementary Figure : PAAD


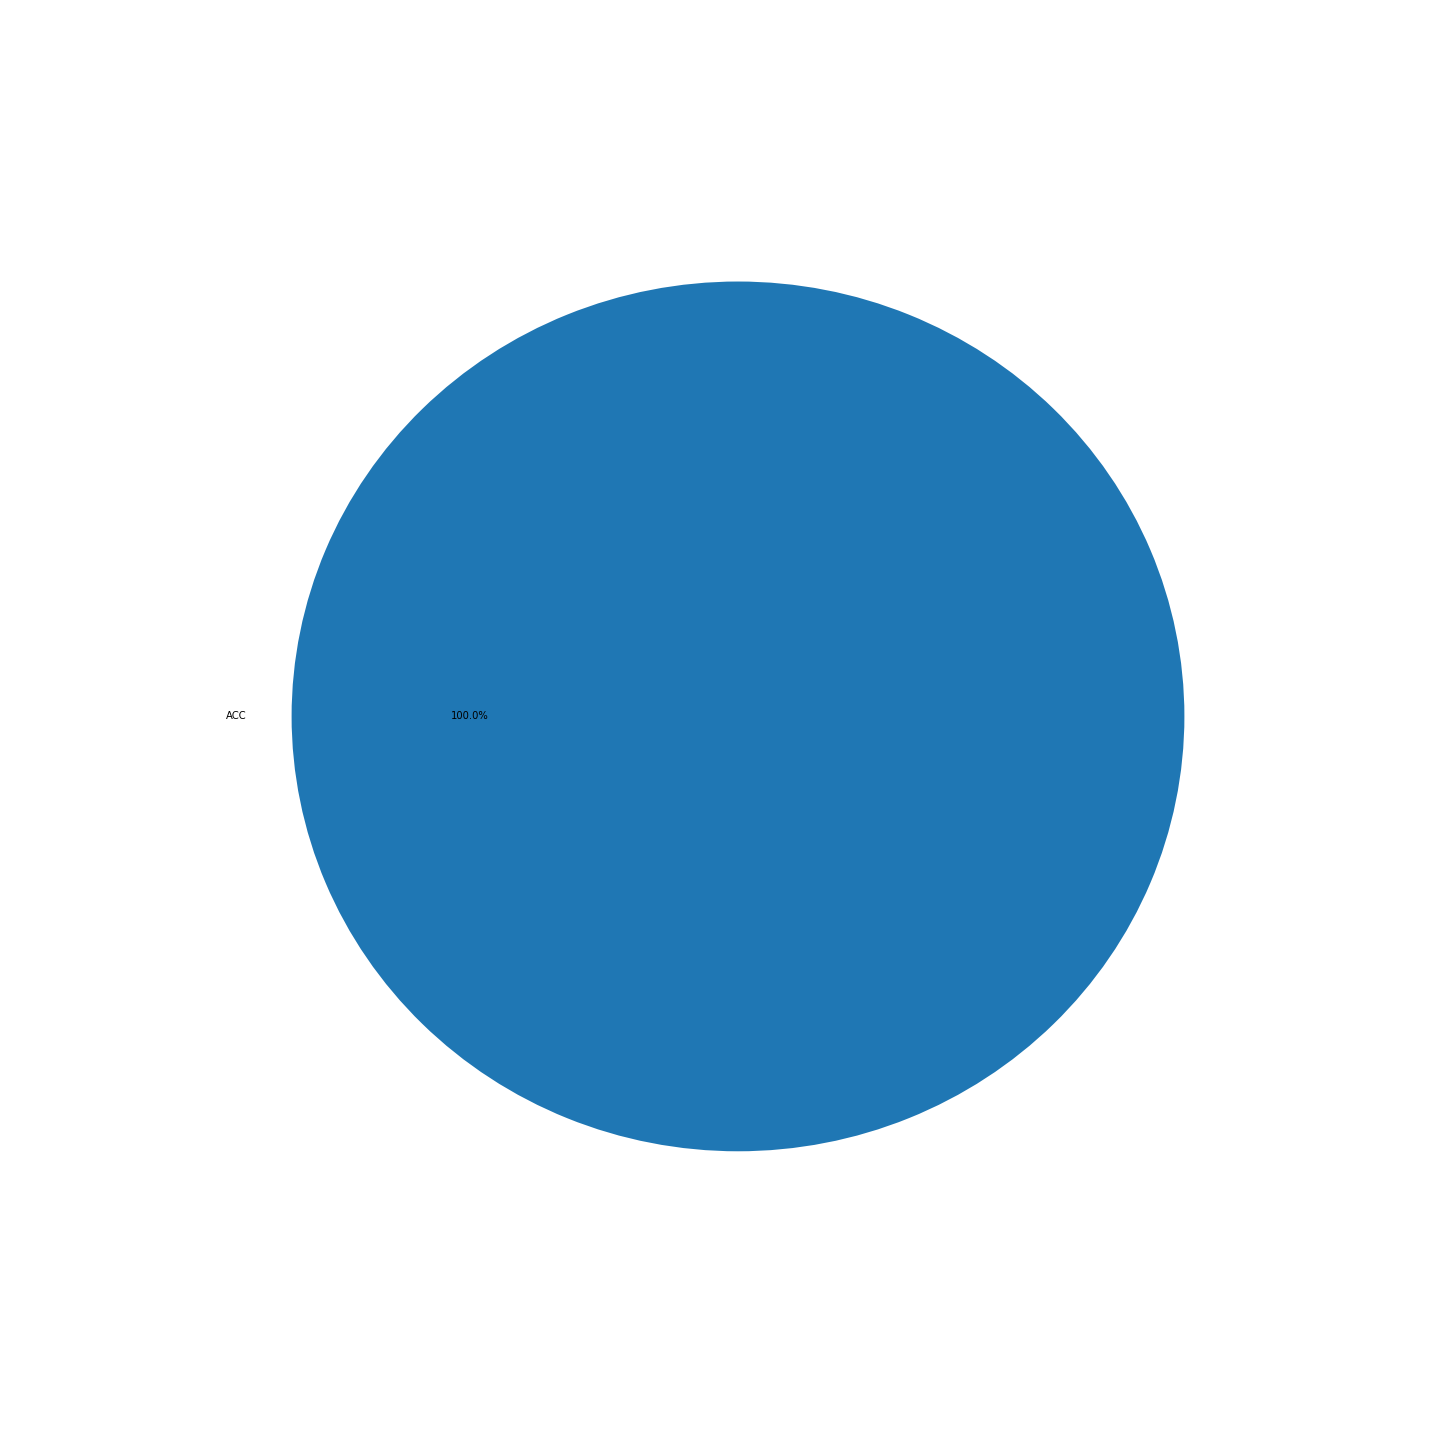


Supplementary Figure :PCPG


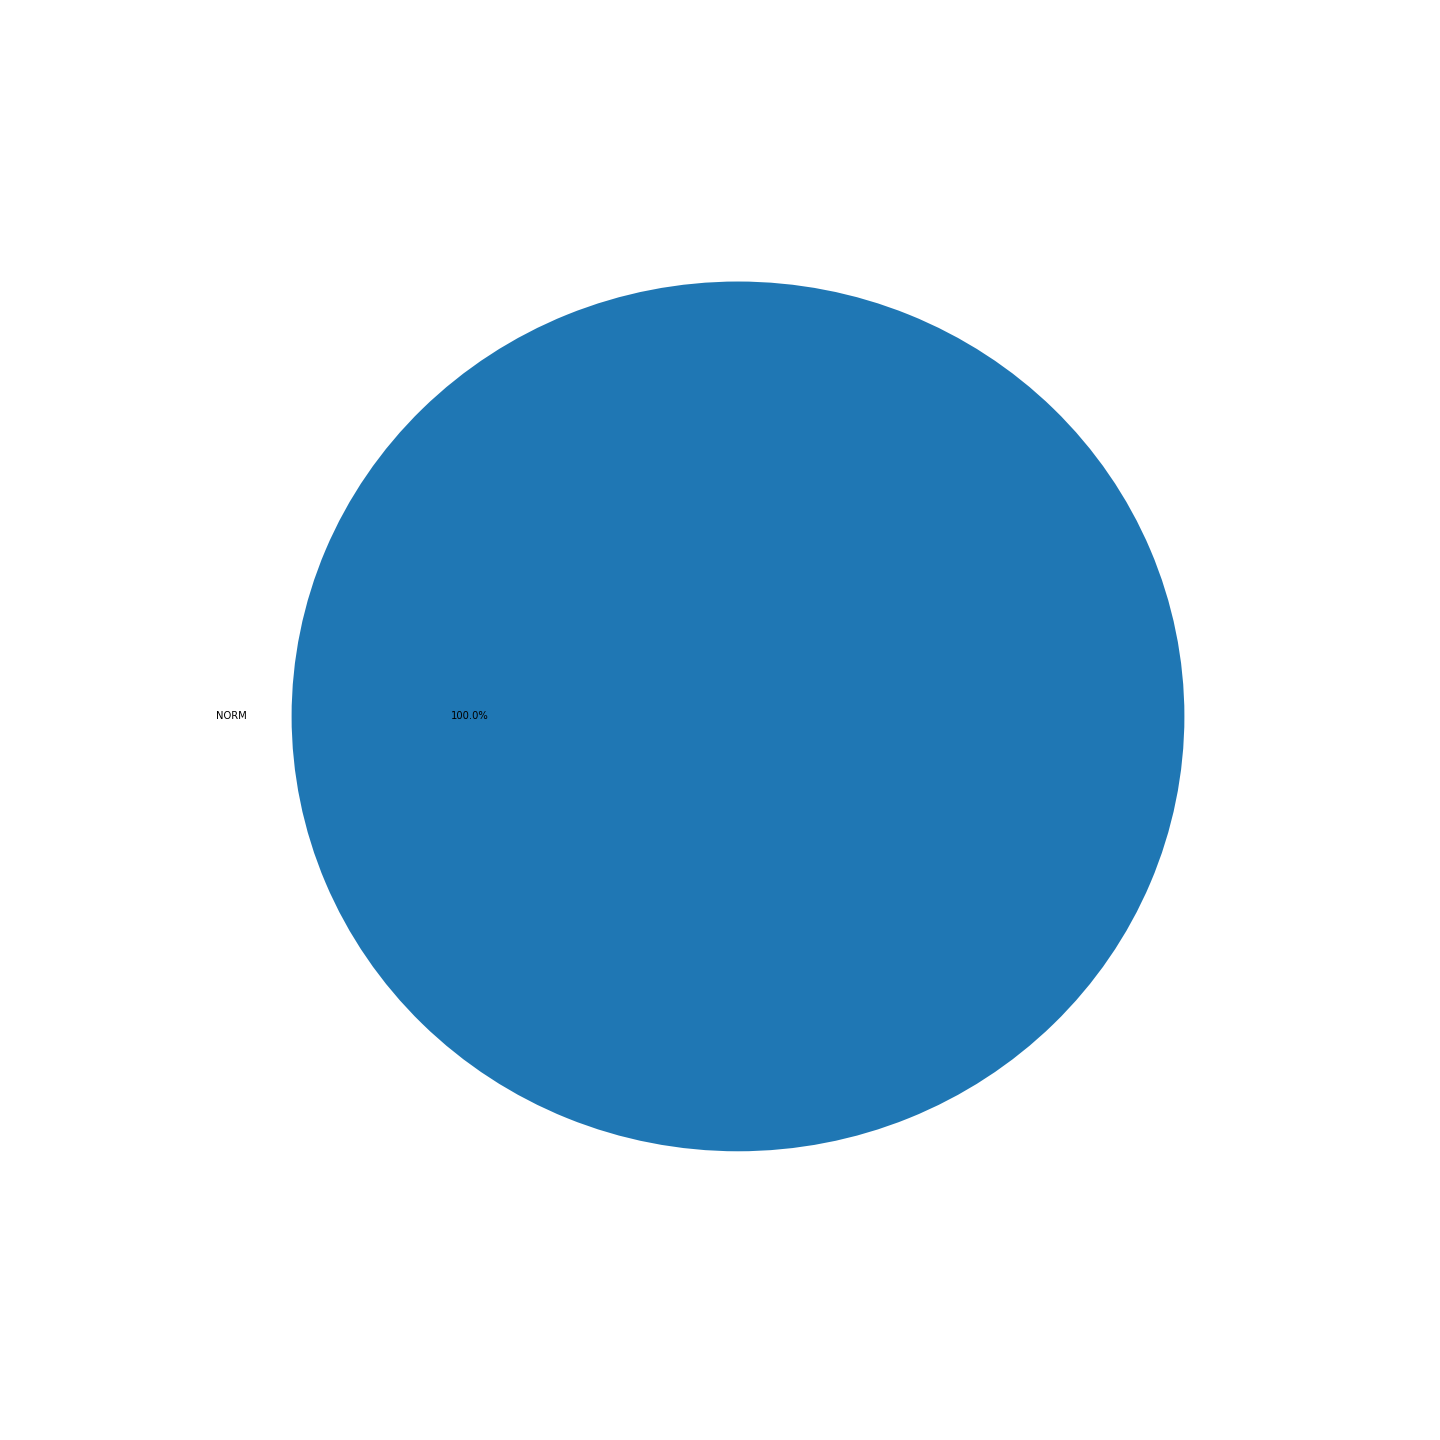


Supplementary Figure :PRAD


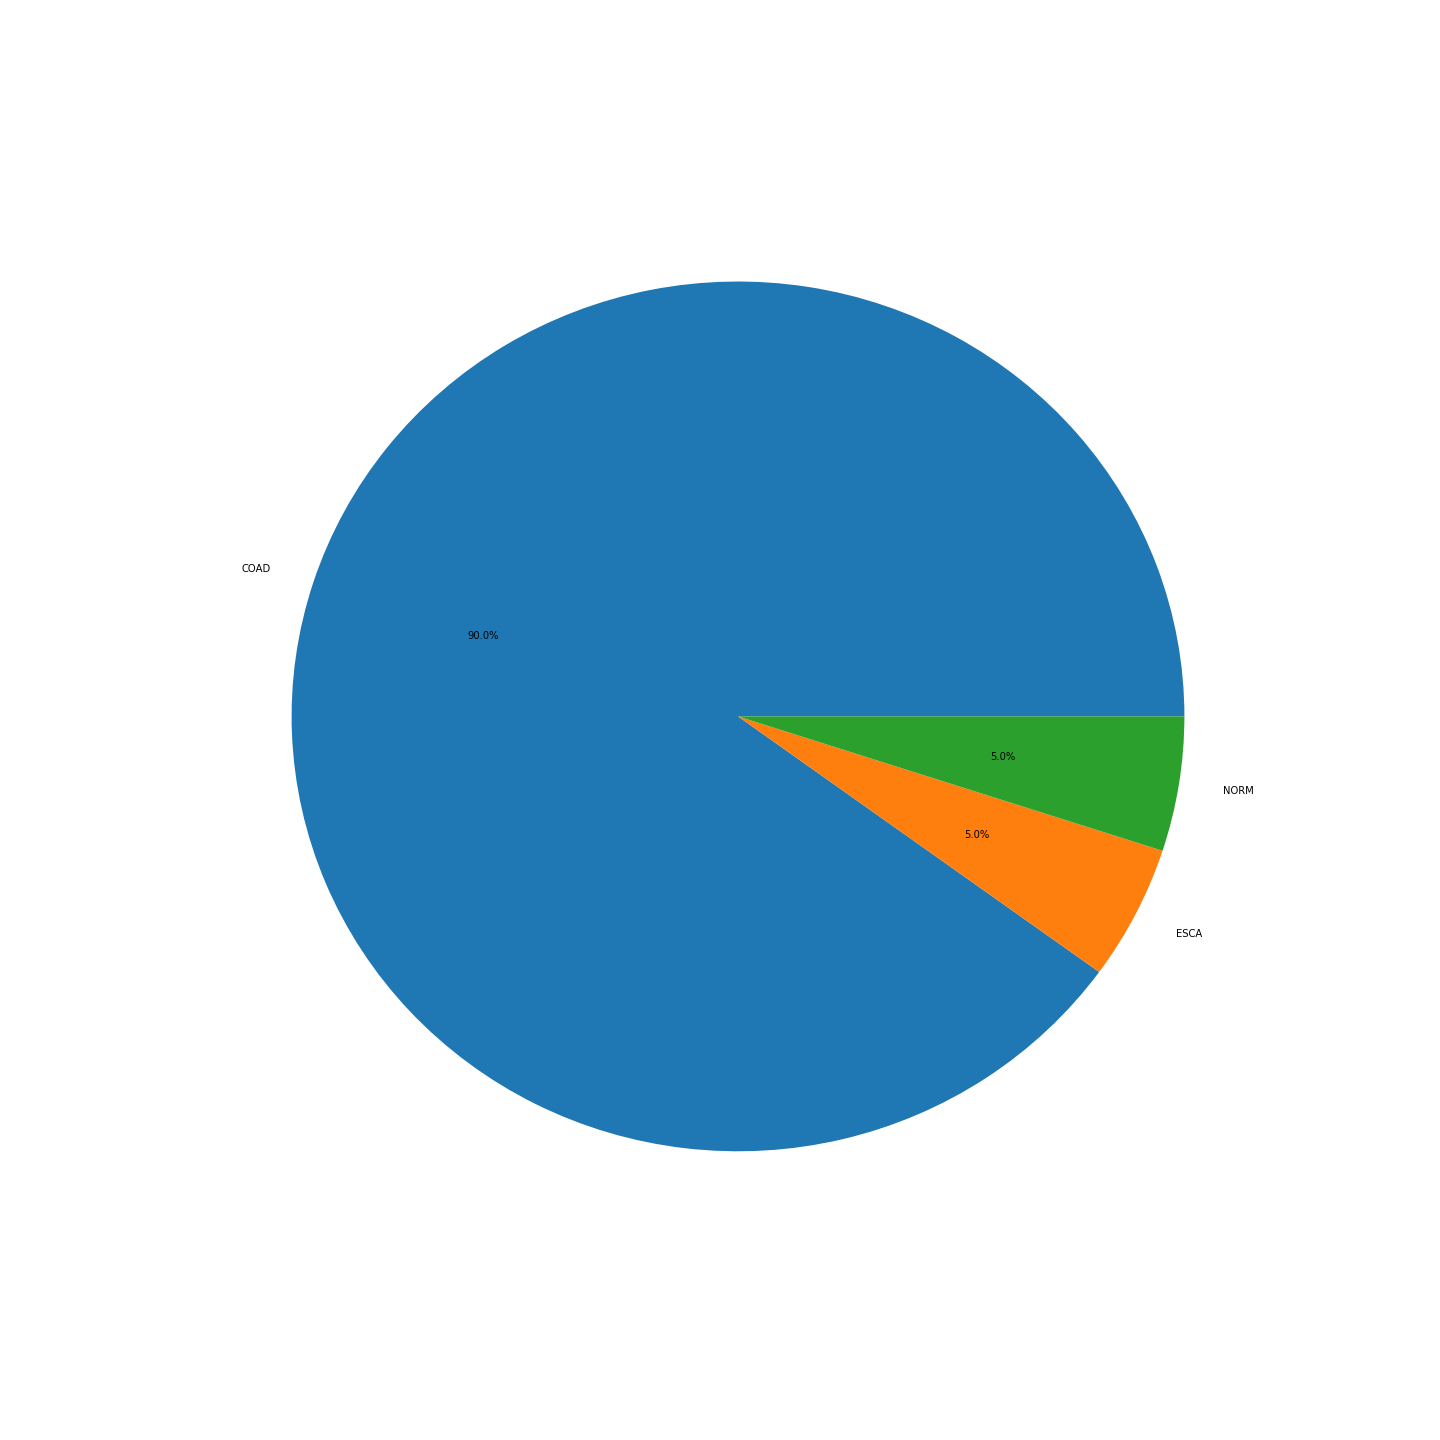


Supplementary Figure : READ


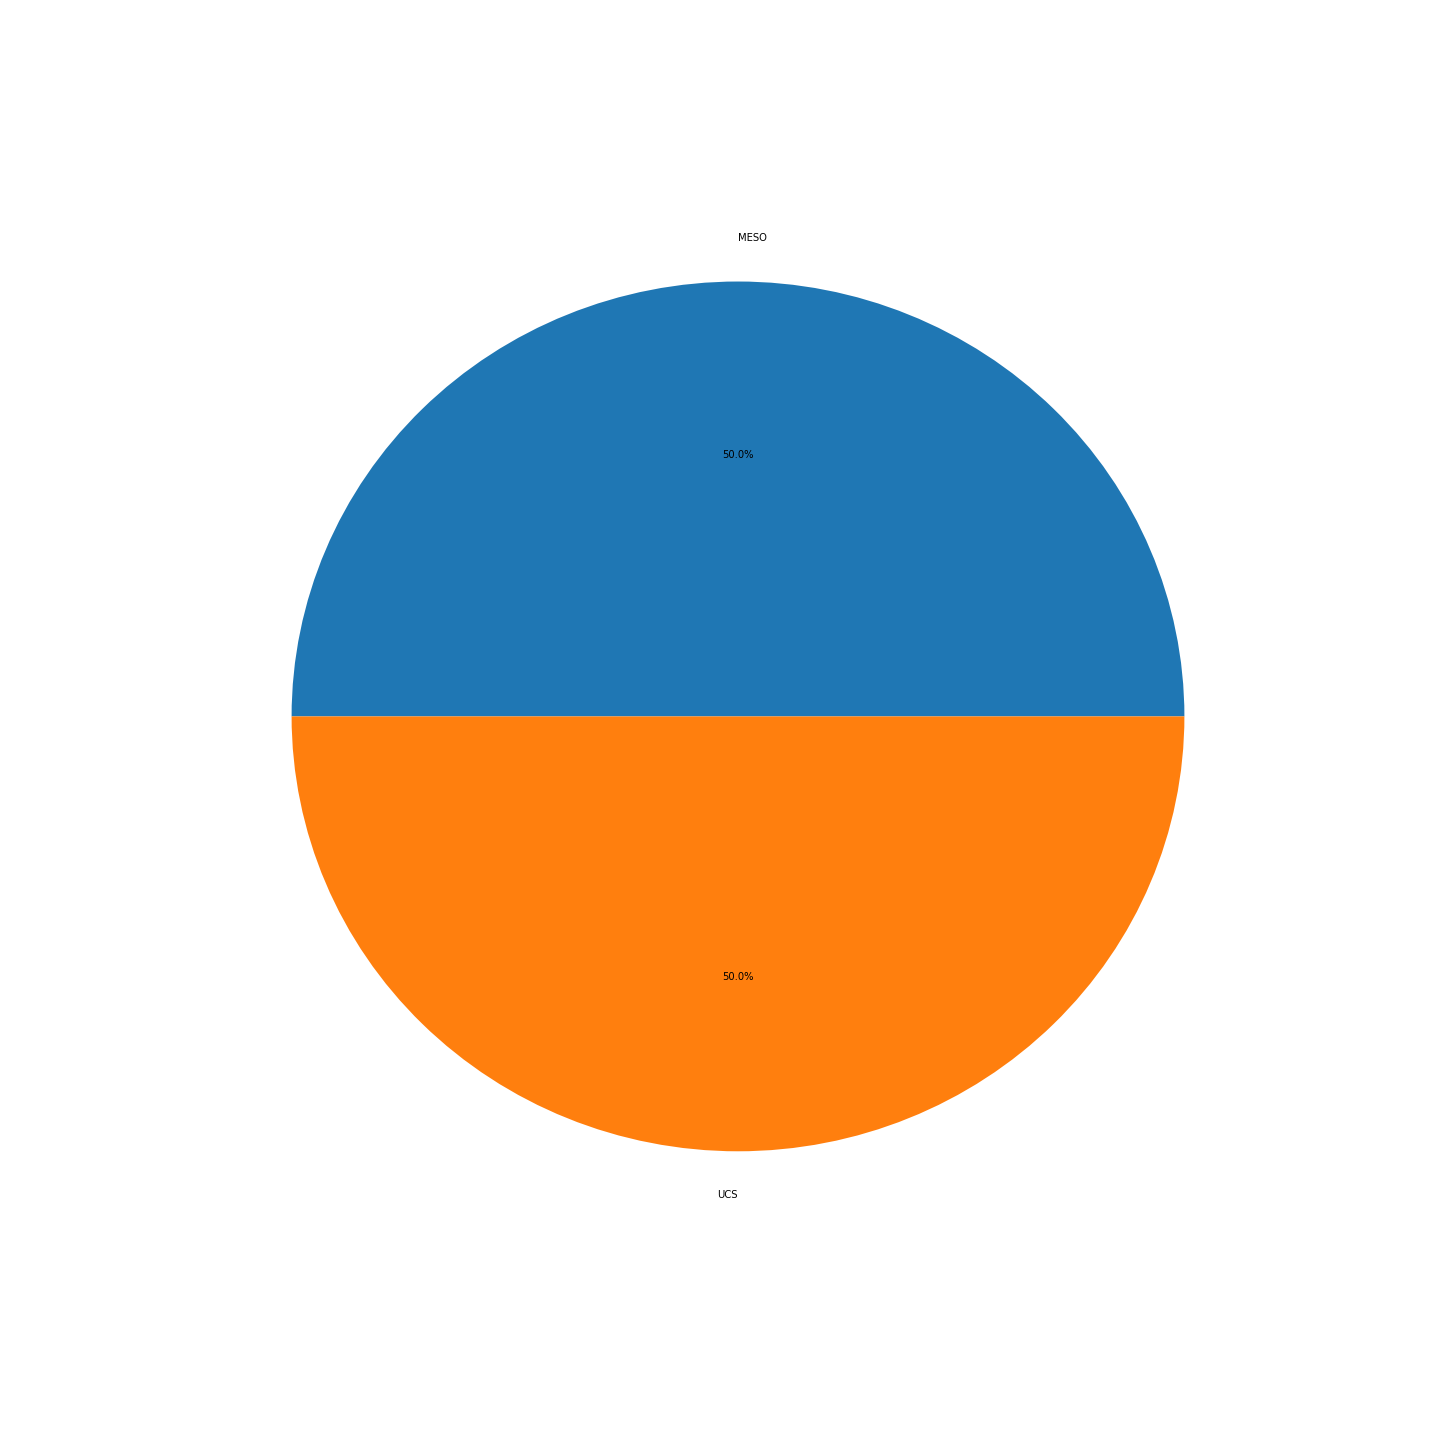


Supplementary Figure :SARC


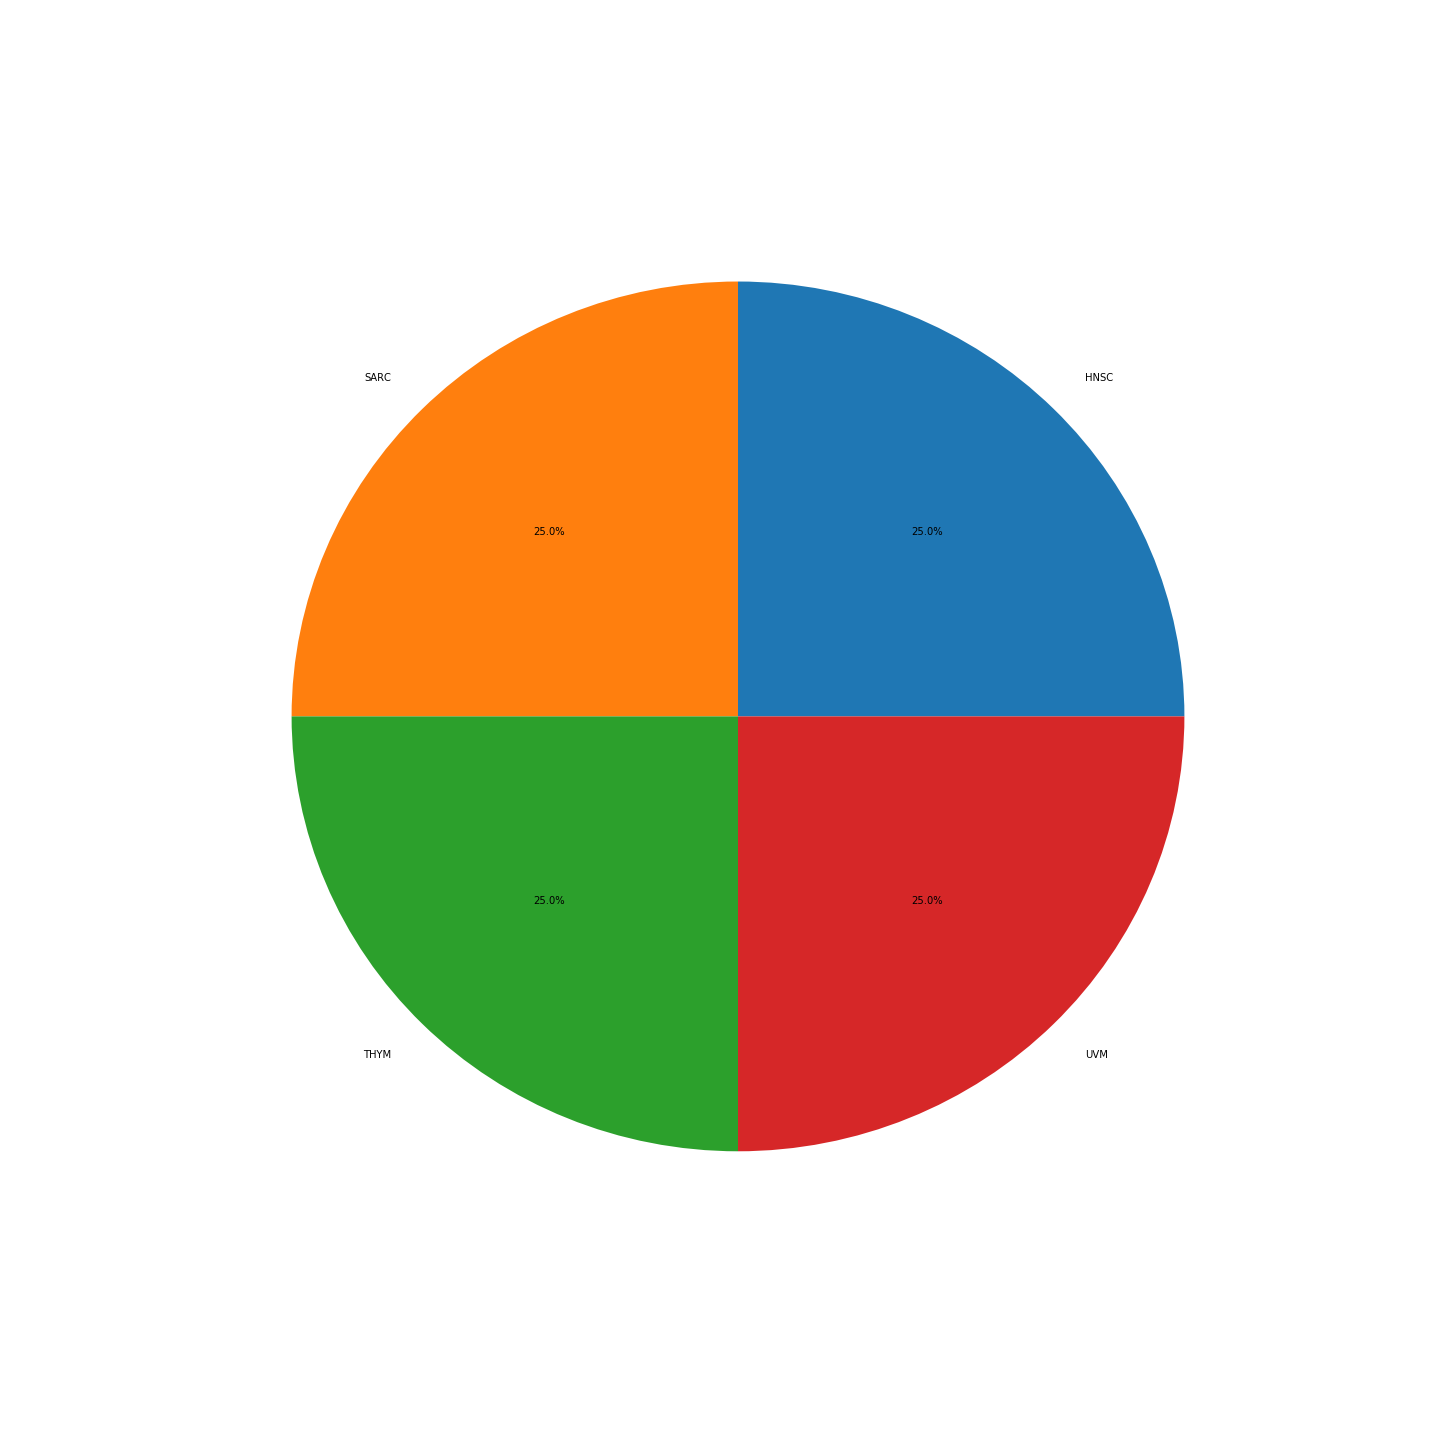


Supplementary Figure :SKCM


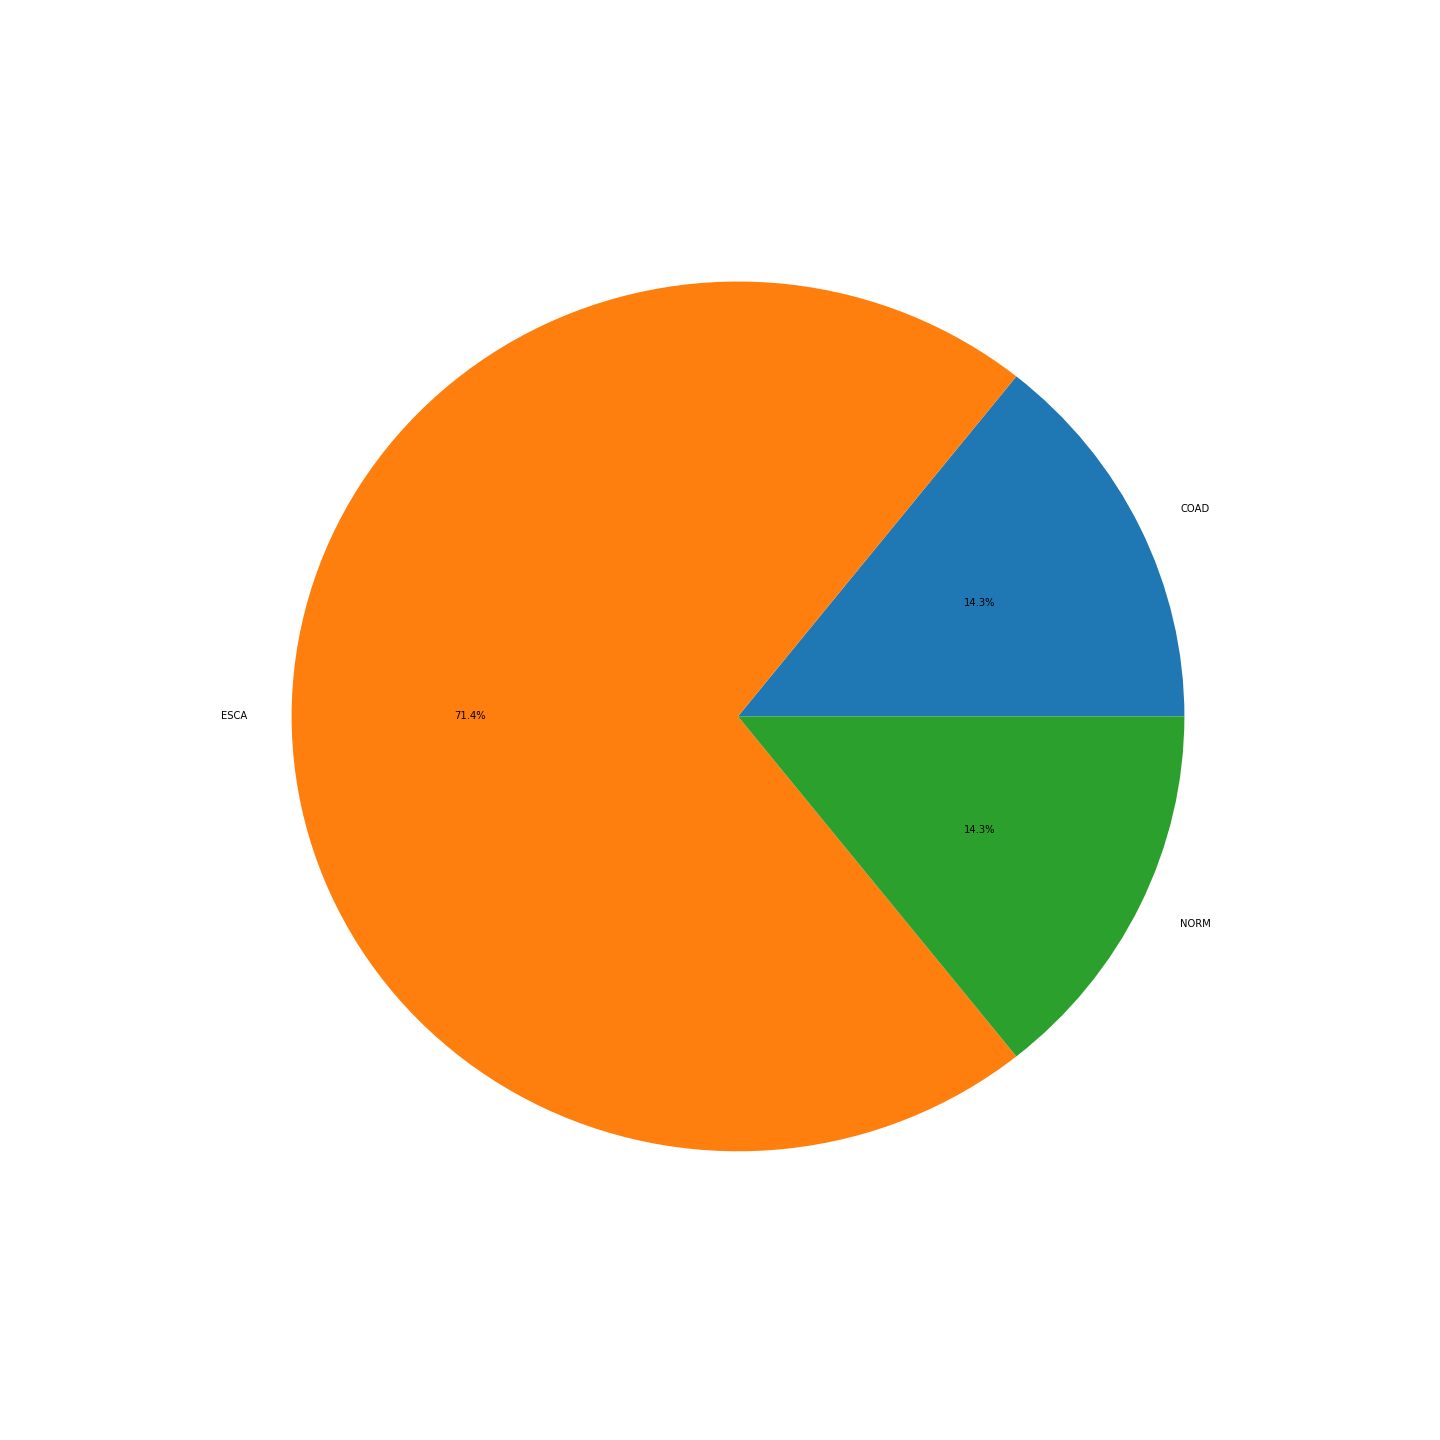


Supplementary Figure :STAD


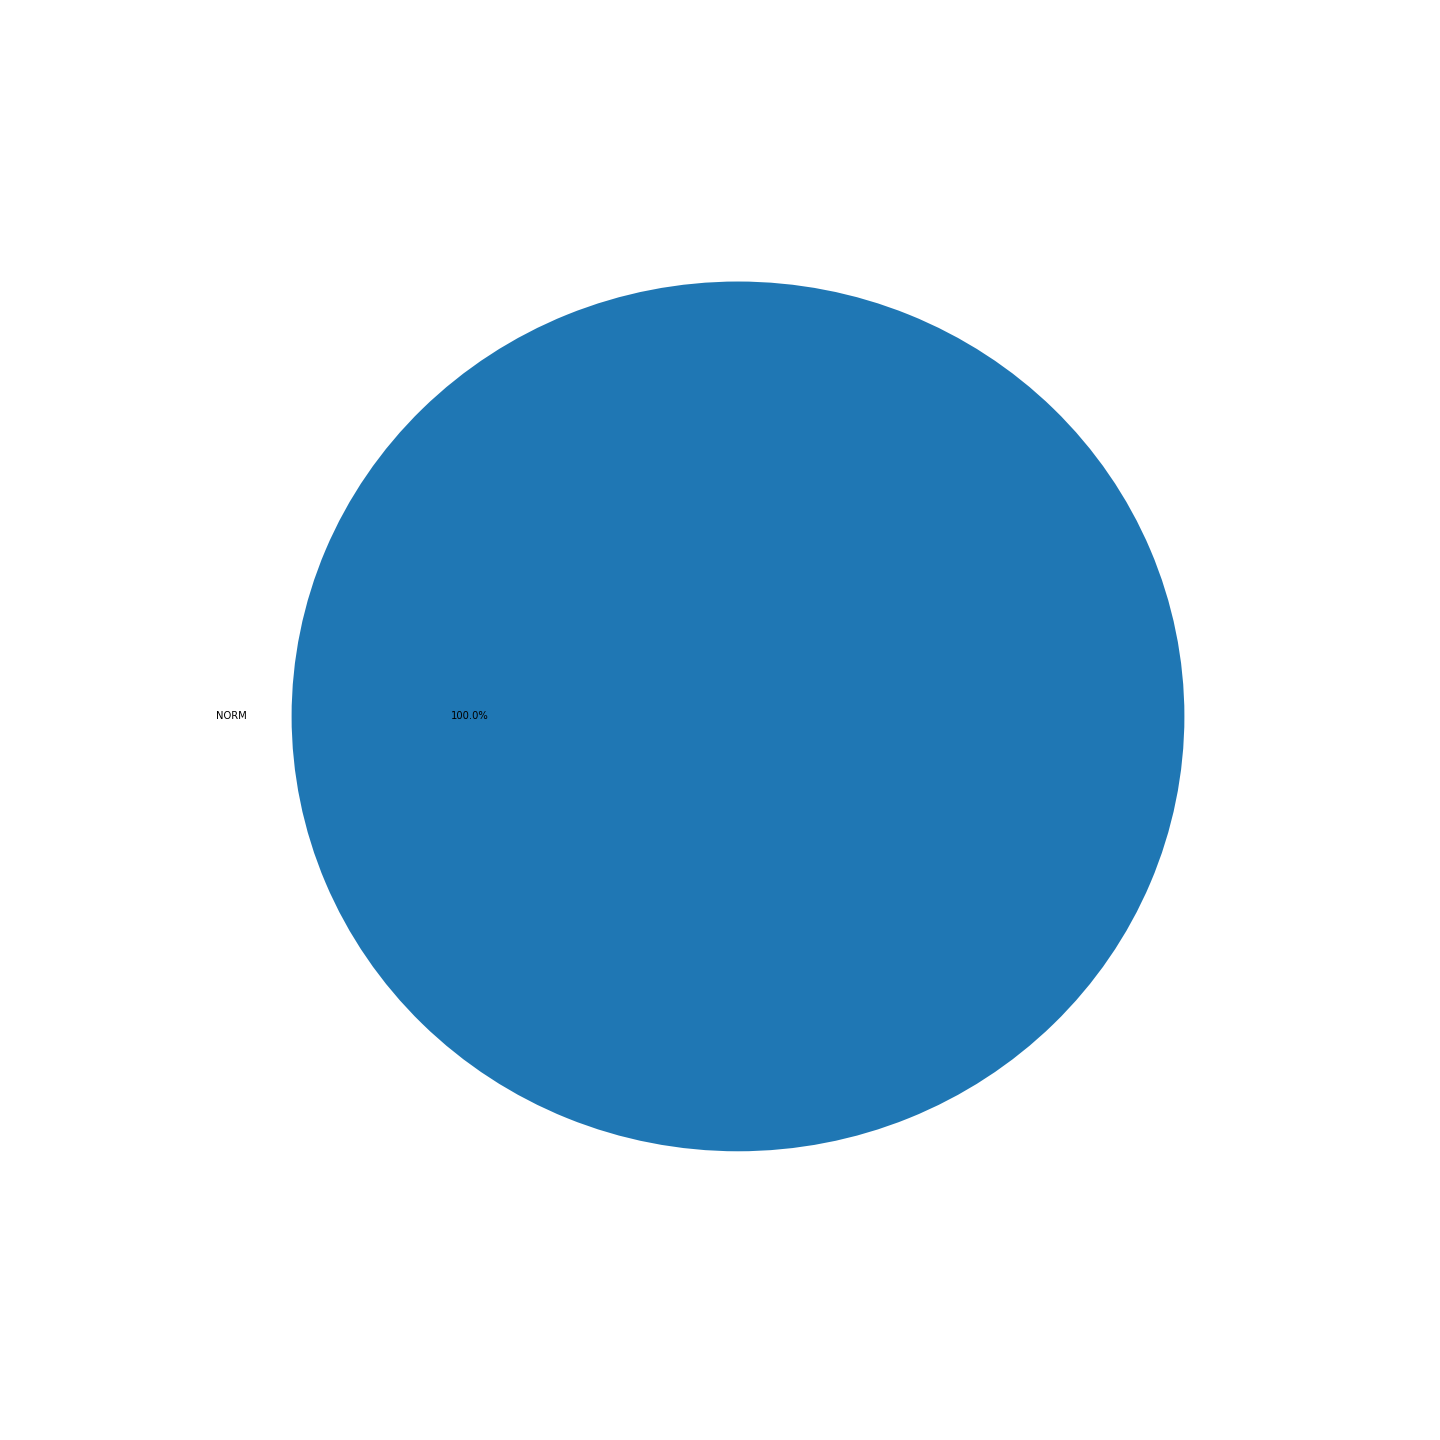


Supplementary Figure :THCA


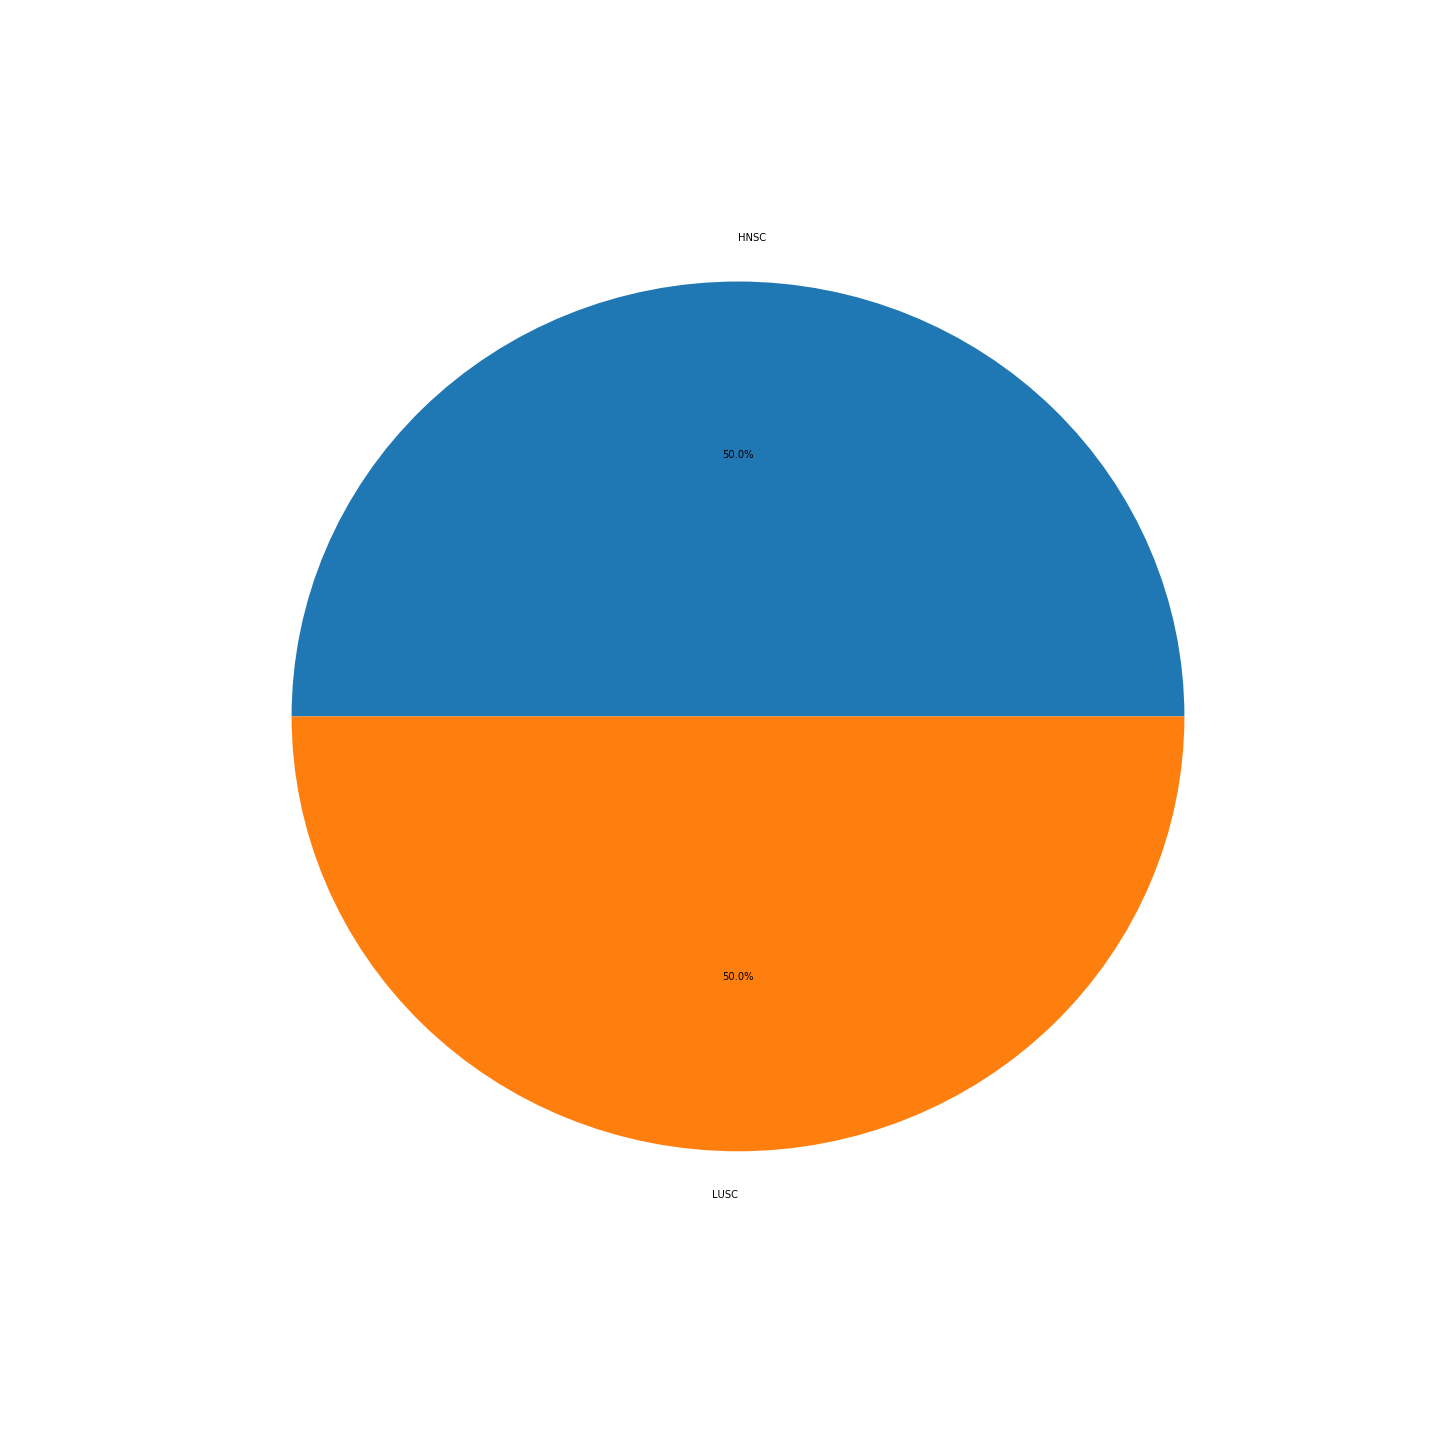


Supplementary Figure : THYM


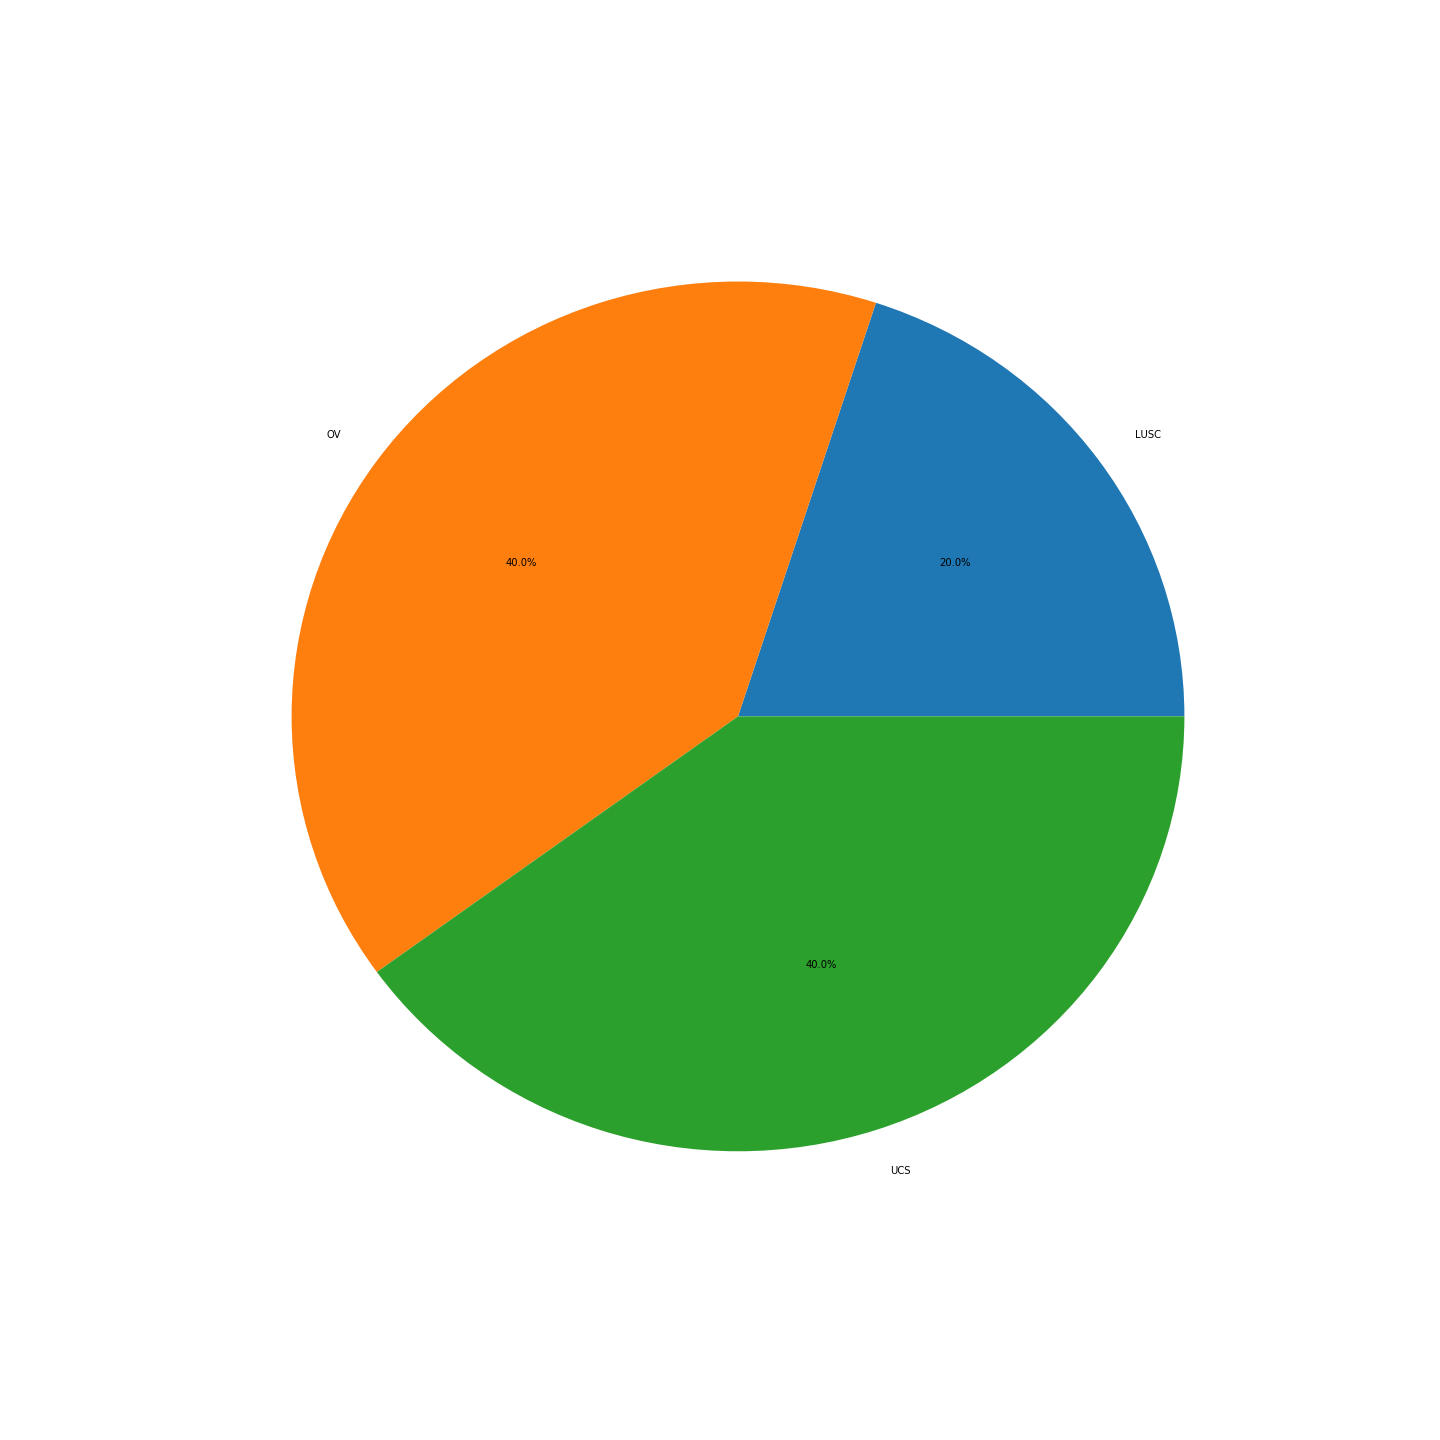


Supplementary Figure :UCEC


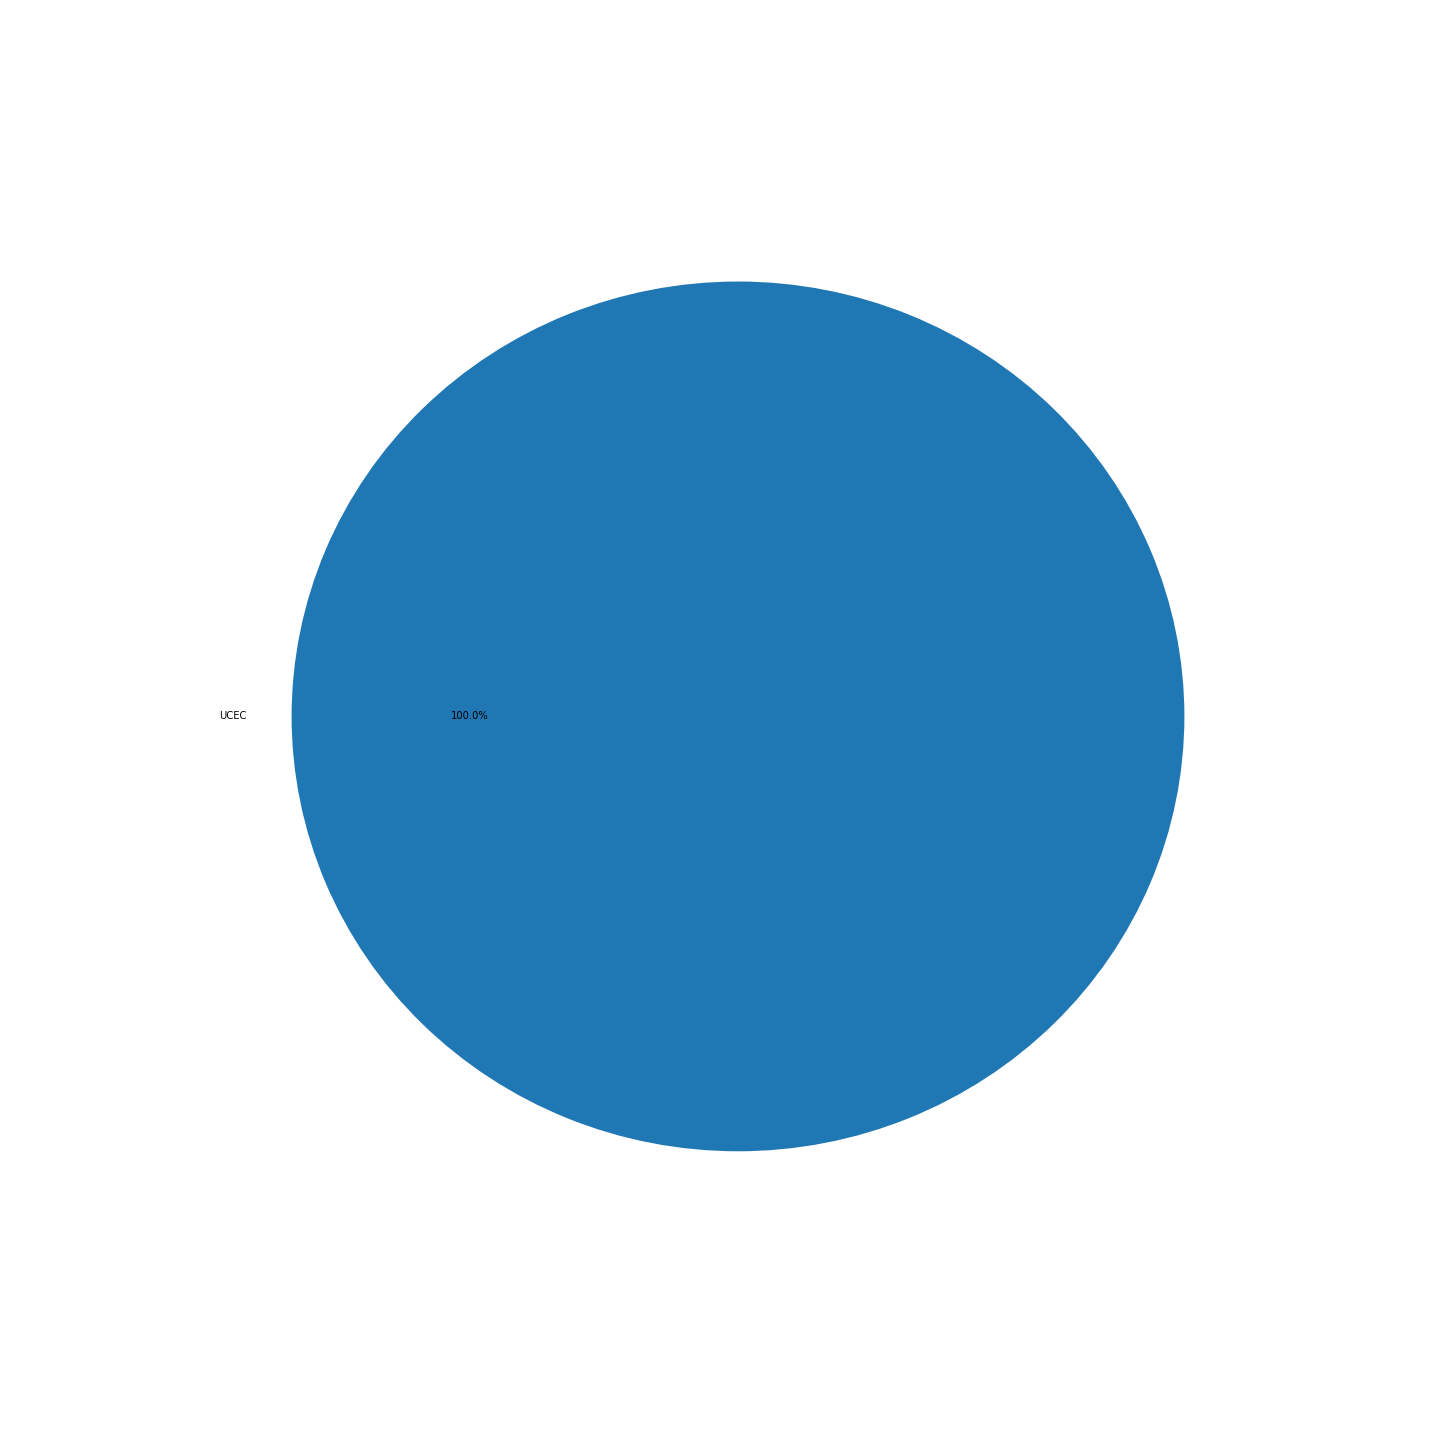


Supplementary Figure : UCS

Supplementary Figures 29 – 63: Latent space locations of each sample by class


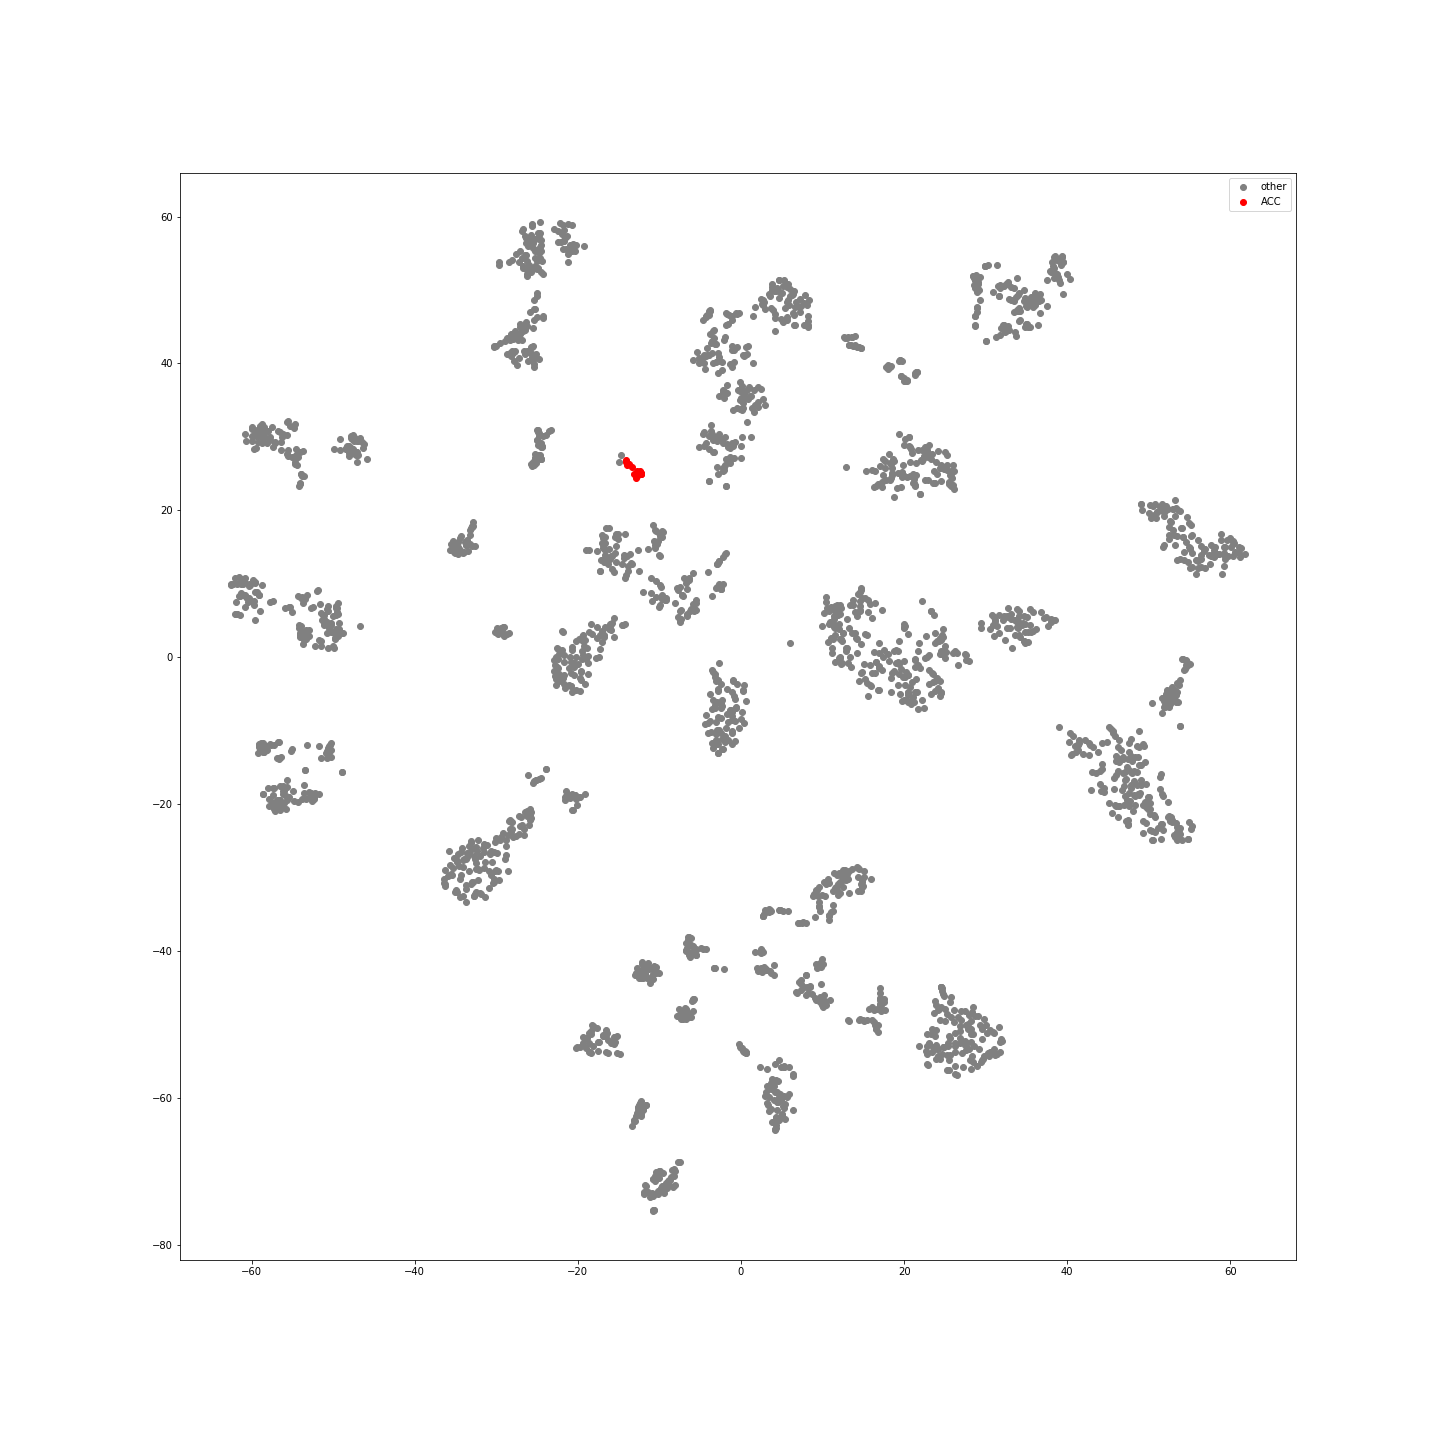


Supplementary Figure 29: ACC Samples in Latent Space


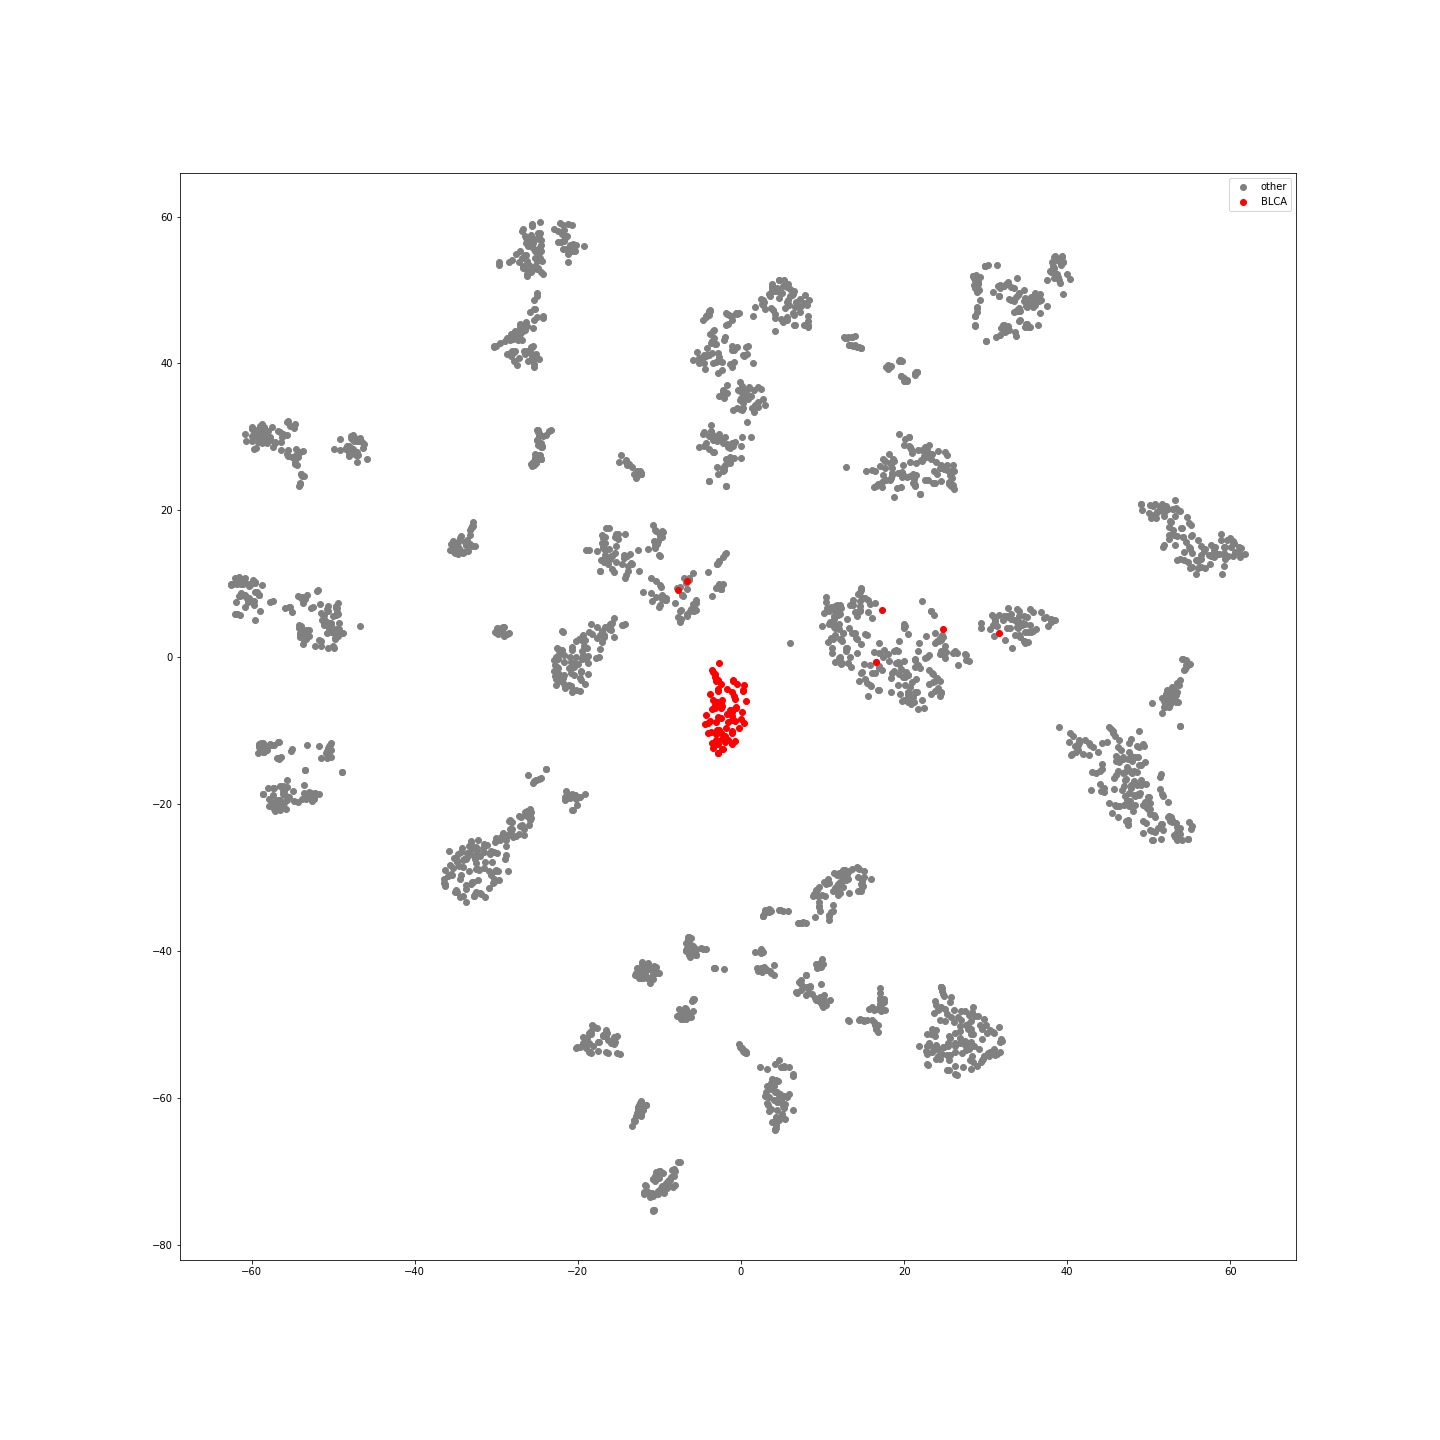


Supplementary Figure 30: BLCA Samples in Latent Space


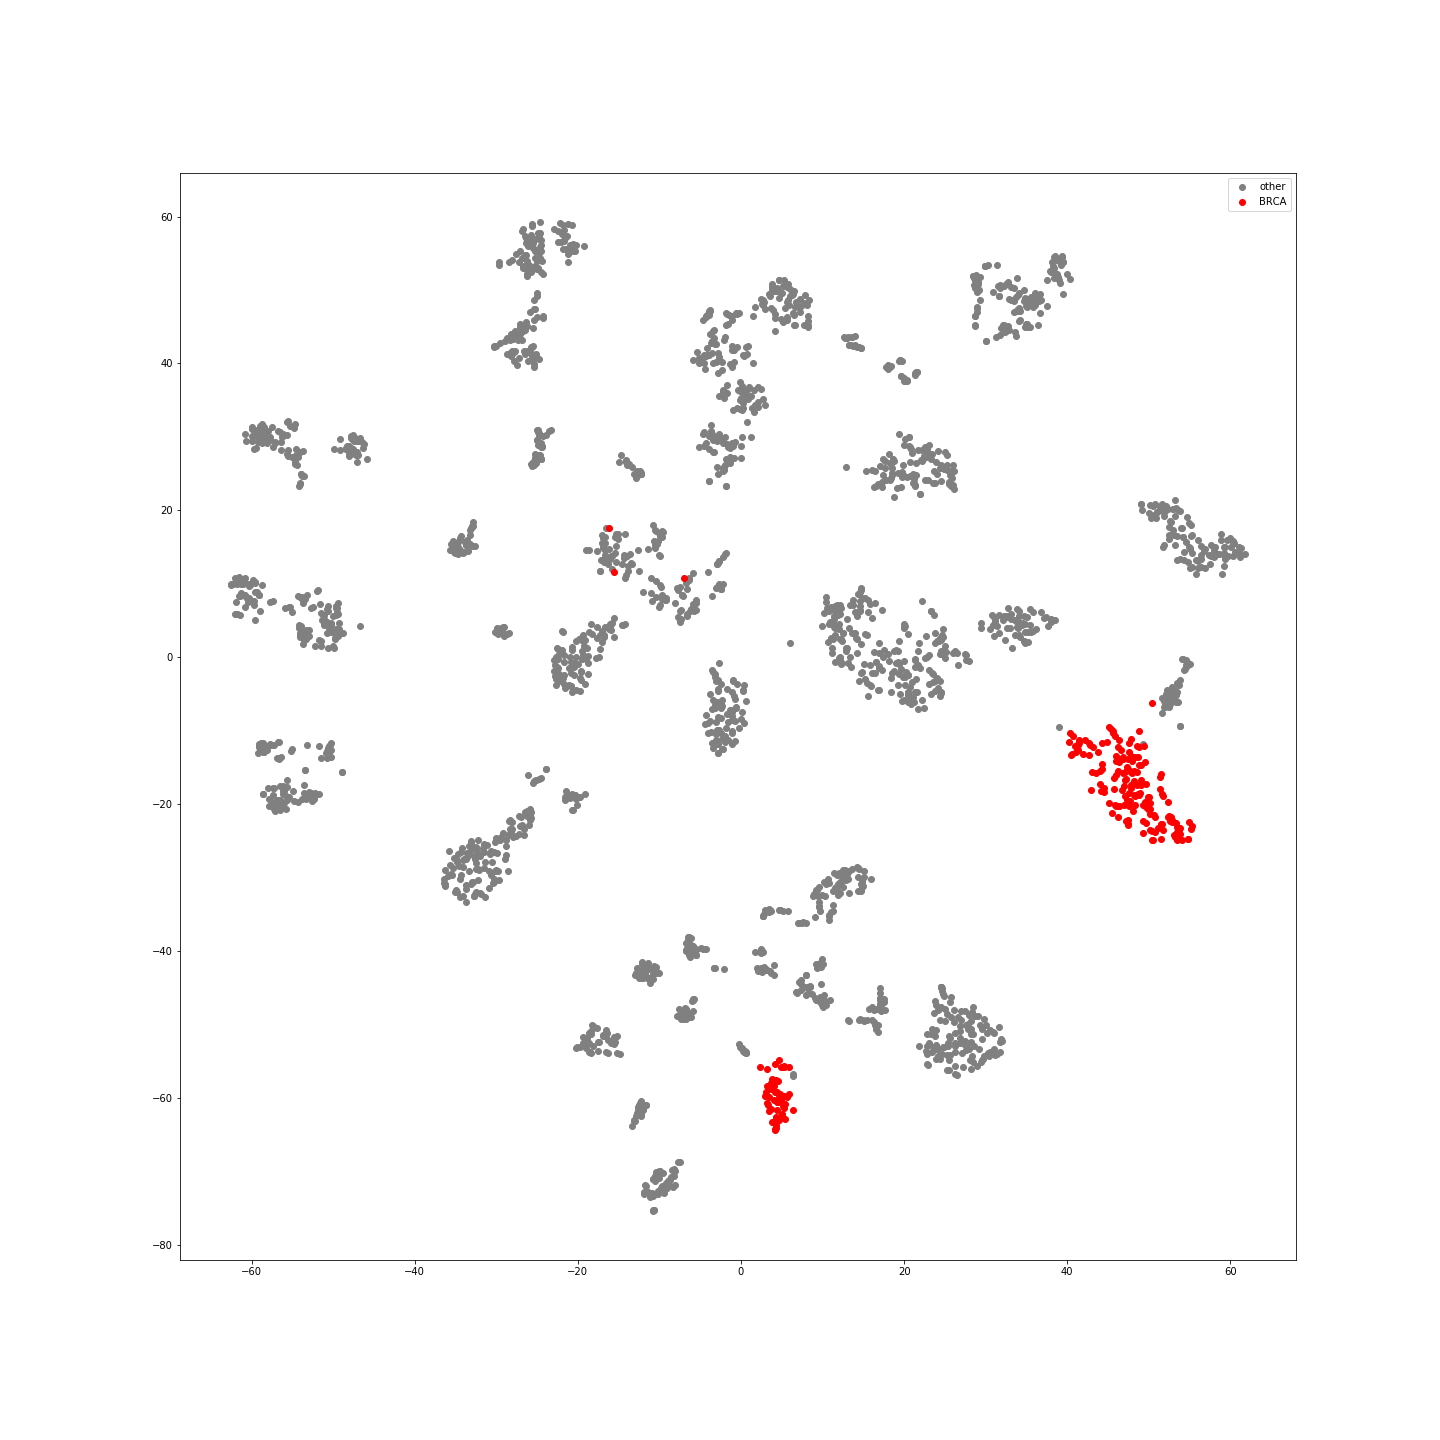


Supplementary Figure 31: BLCA Samples in Latent Space


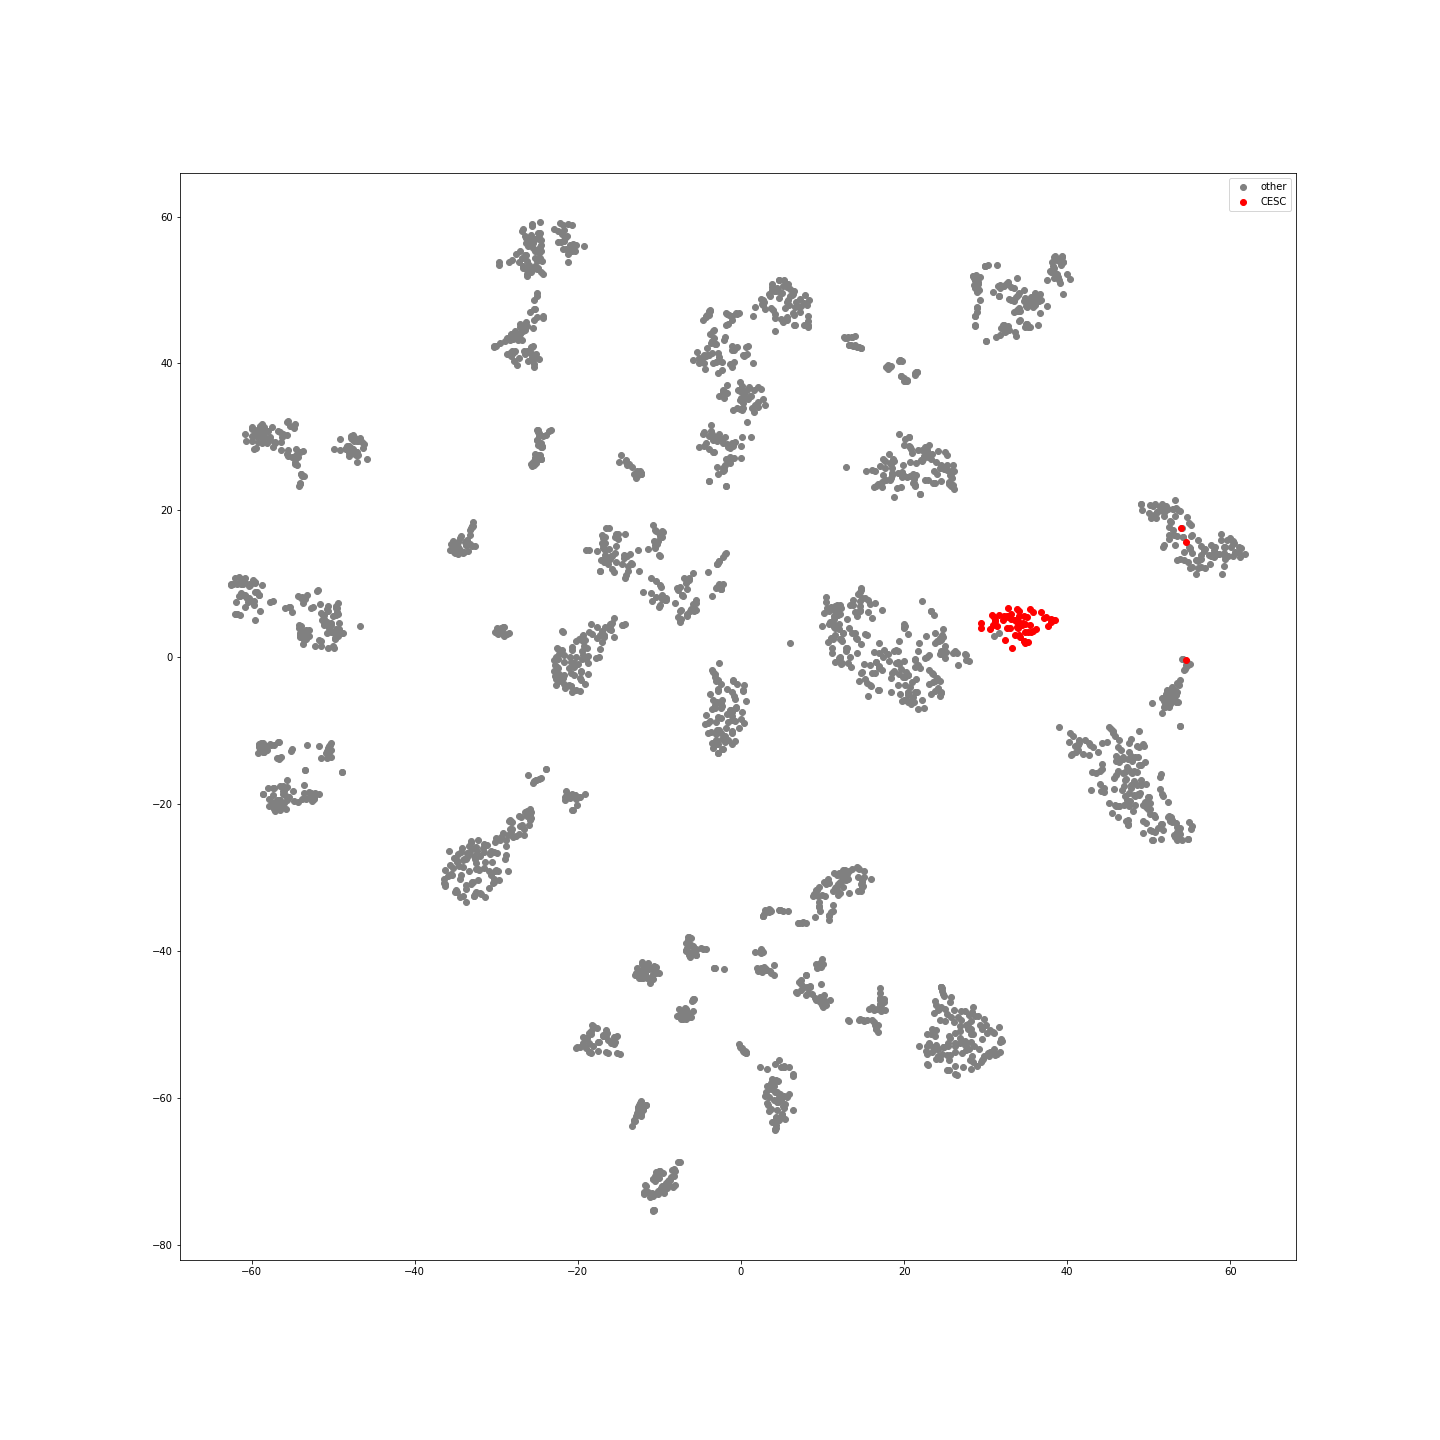


Supplementary Figure 32: CESC Samples in Latent Space


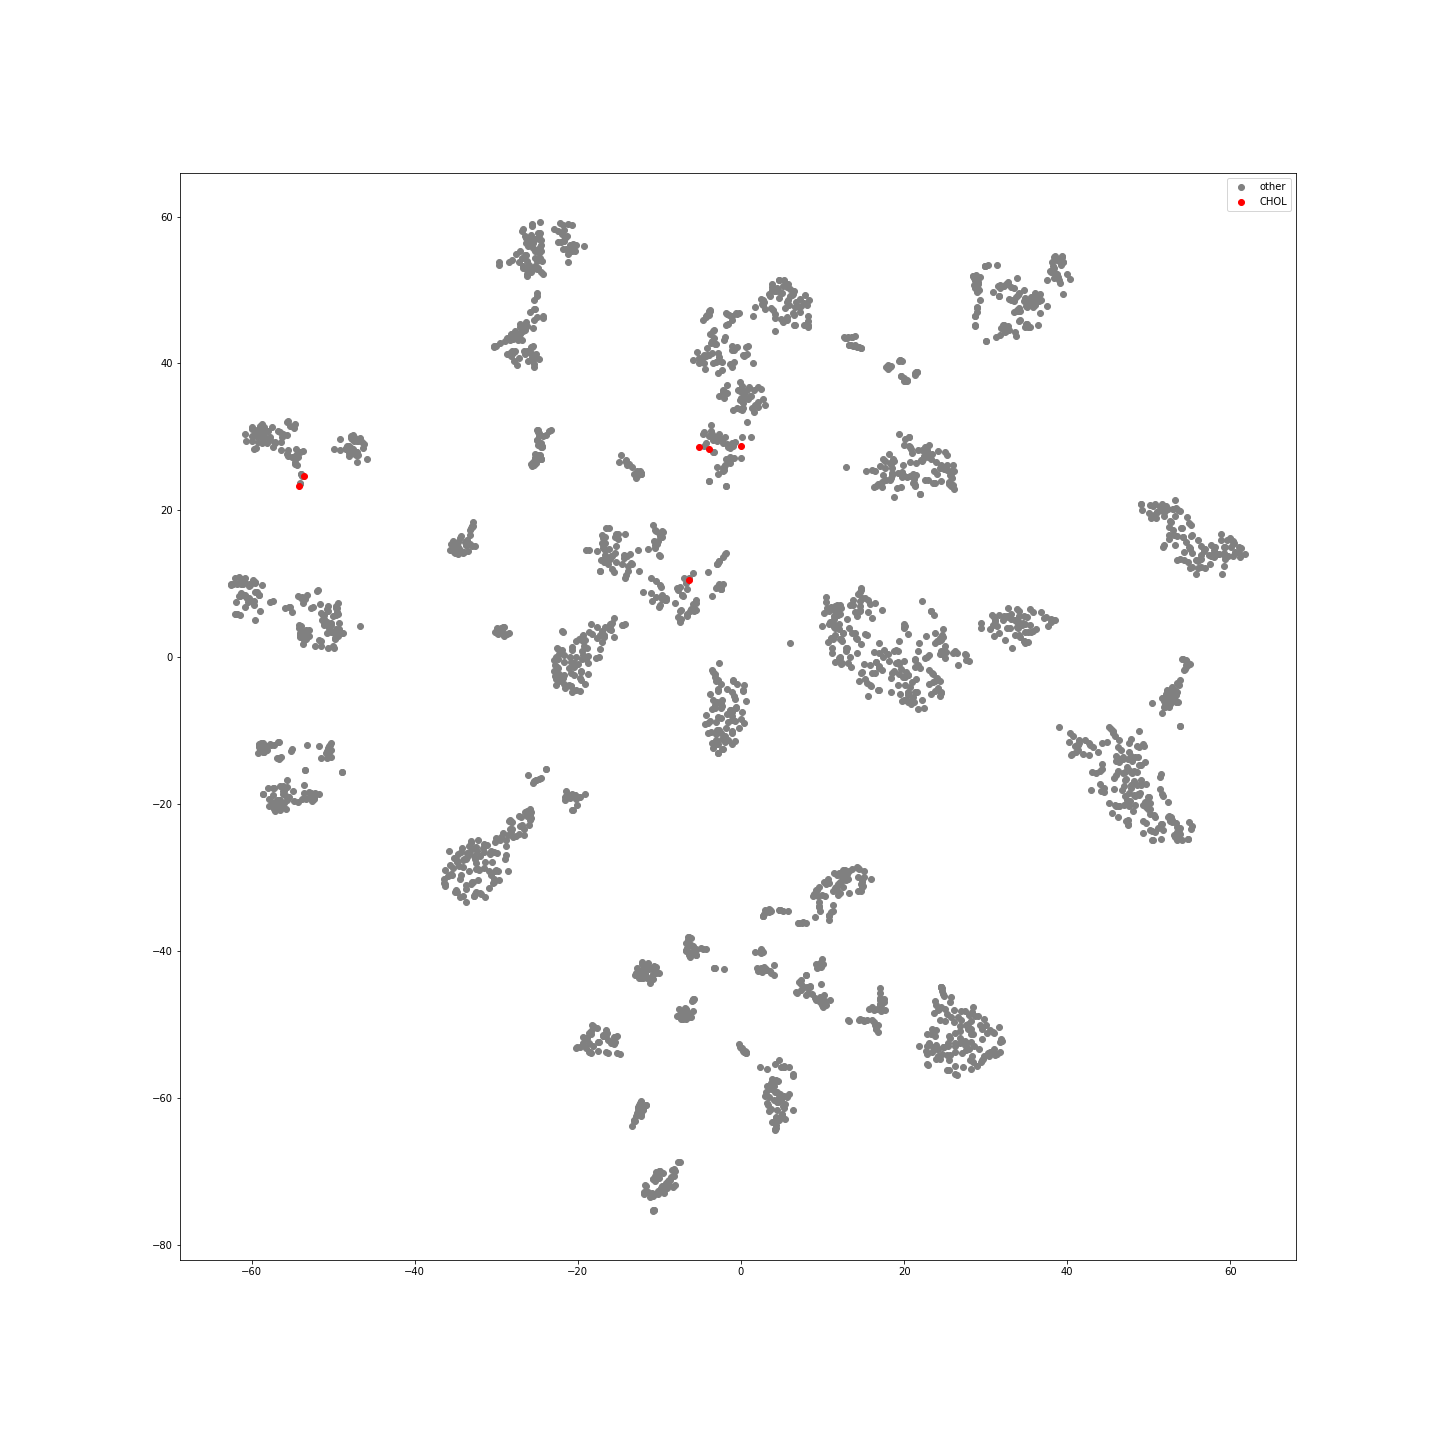


Supplementary Figure 33: CHOL Samples in Latent Space


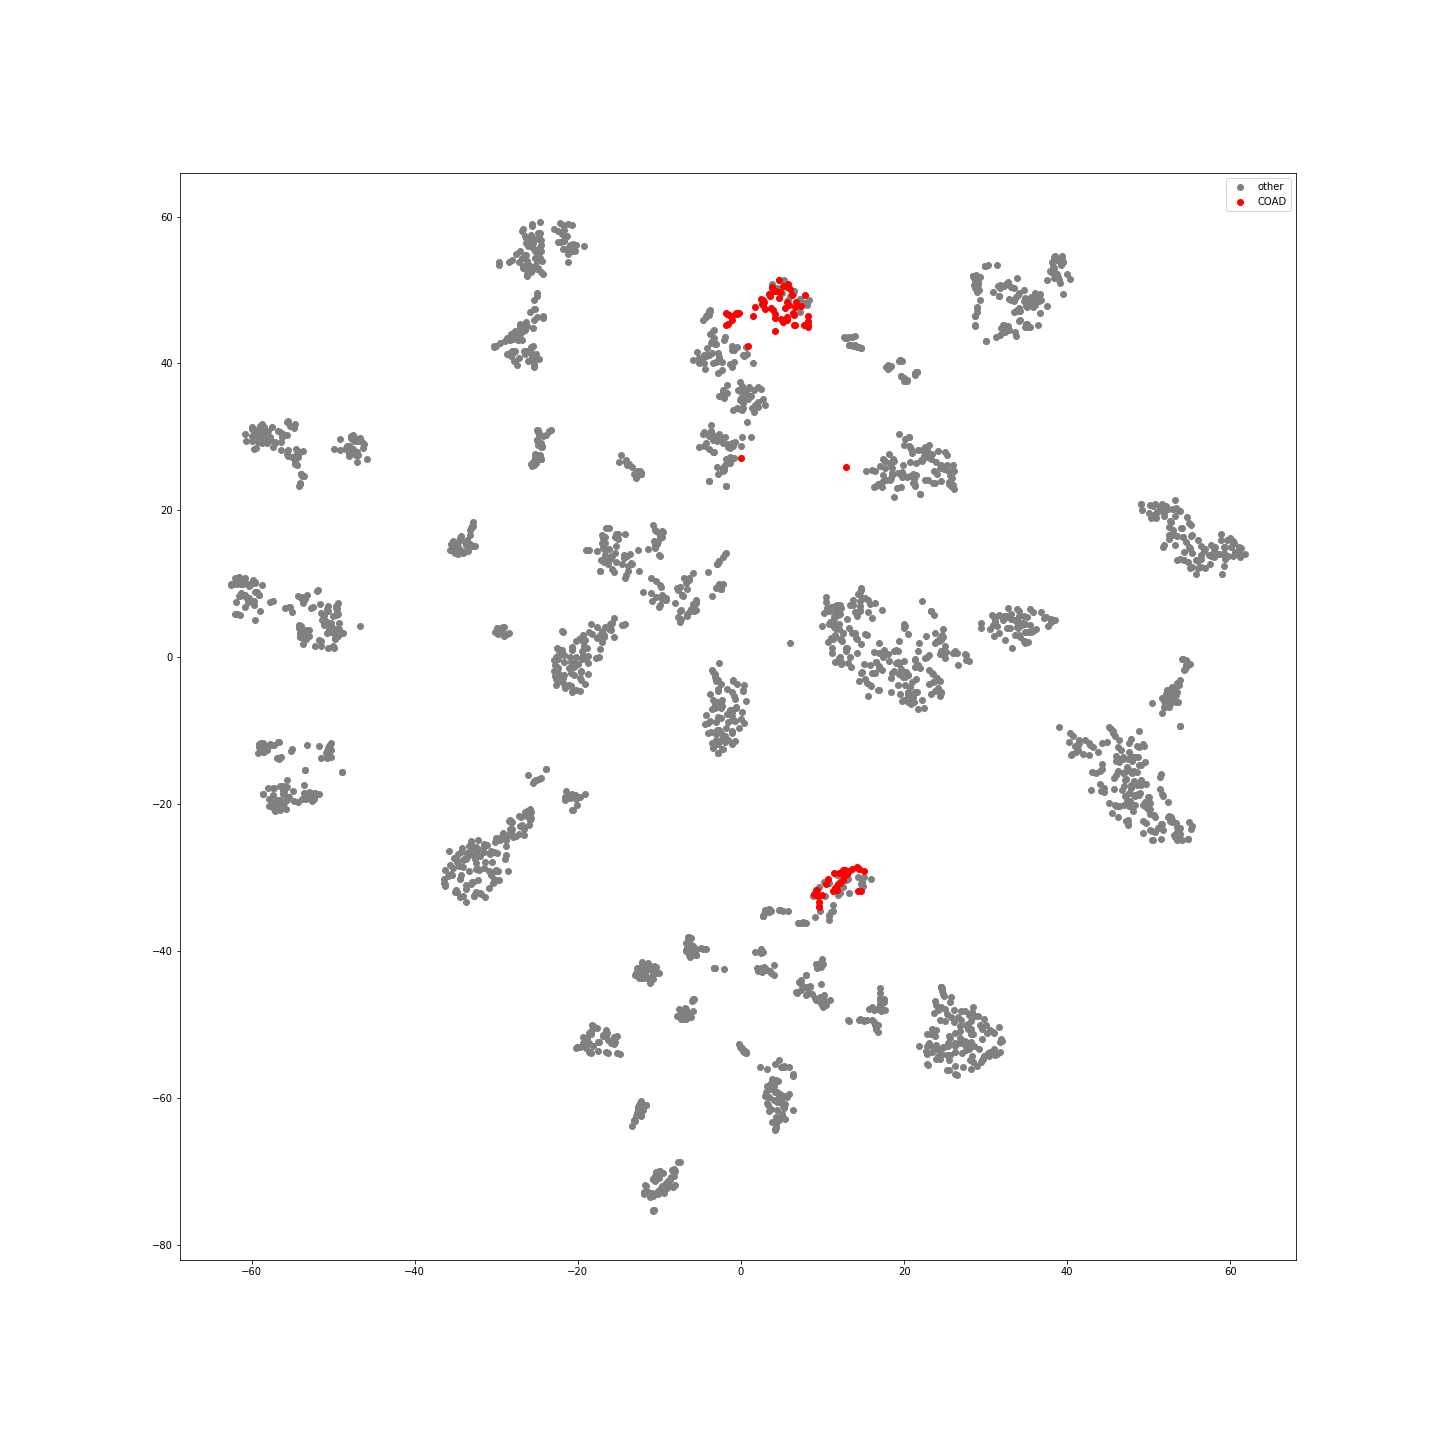


Supplementary Figure 34: COAD Samples in Latent Space


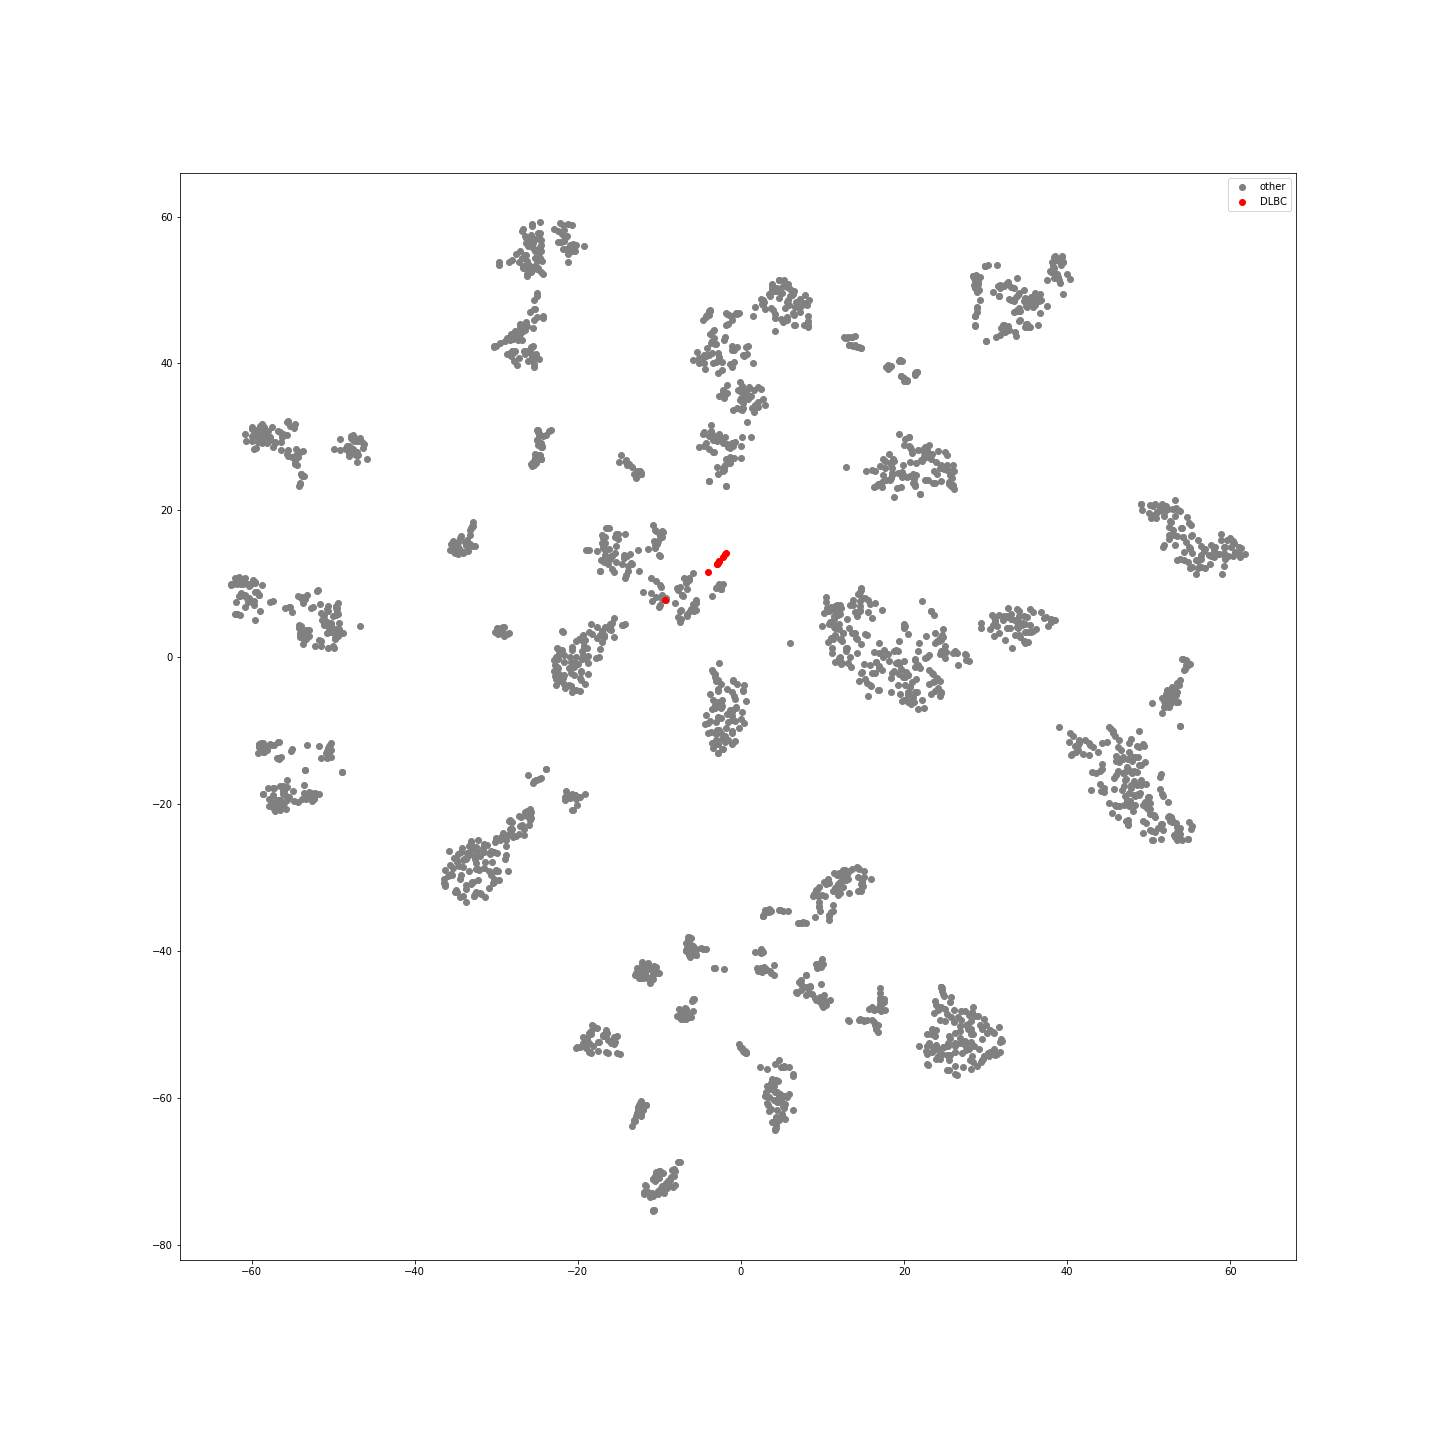


Supplementary Figure 35: DLBC Samples in Latent Space


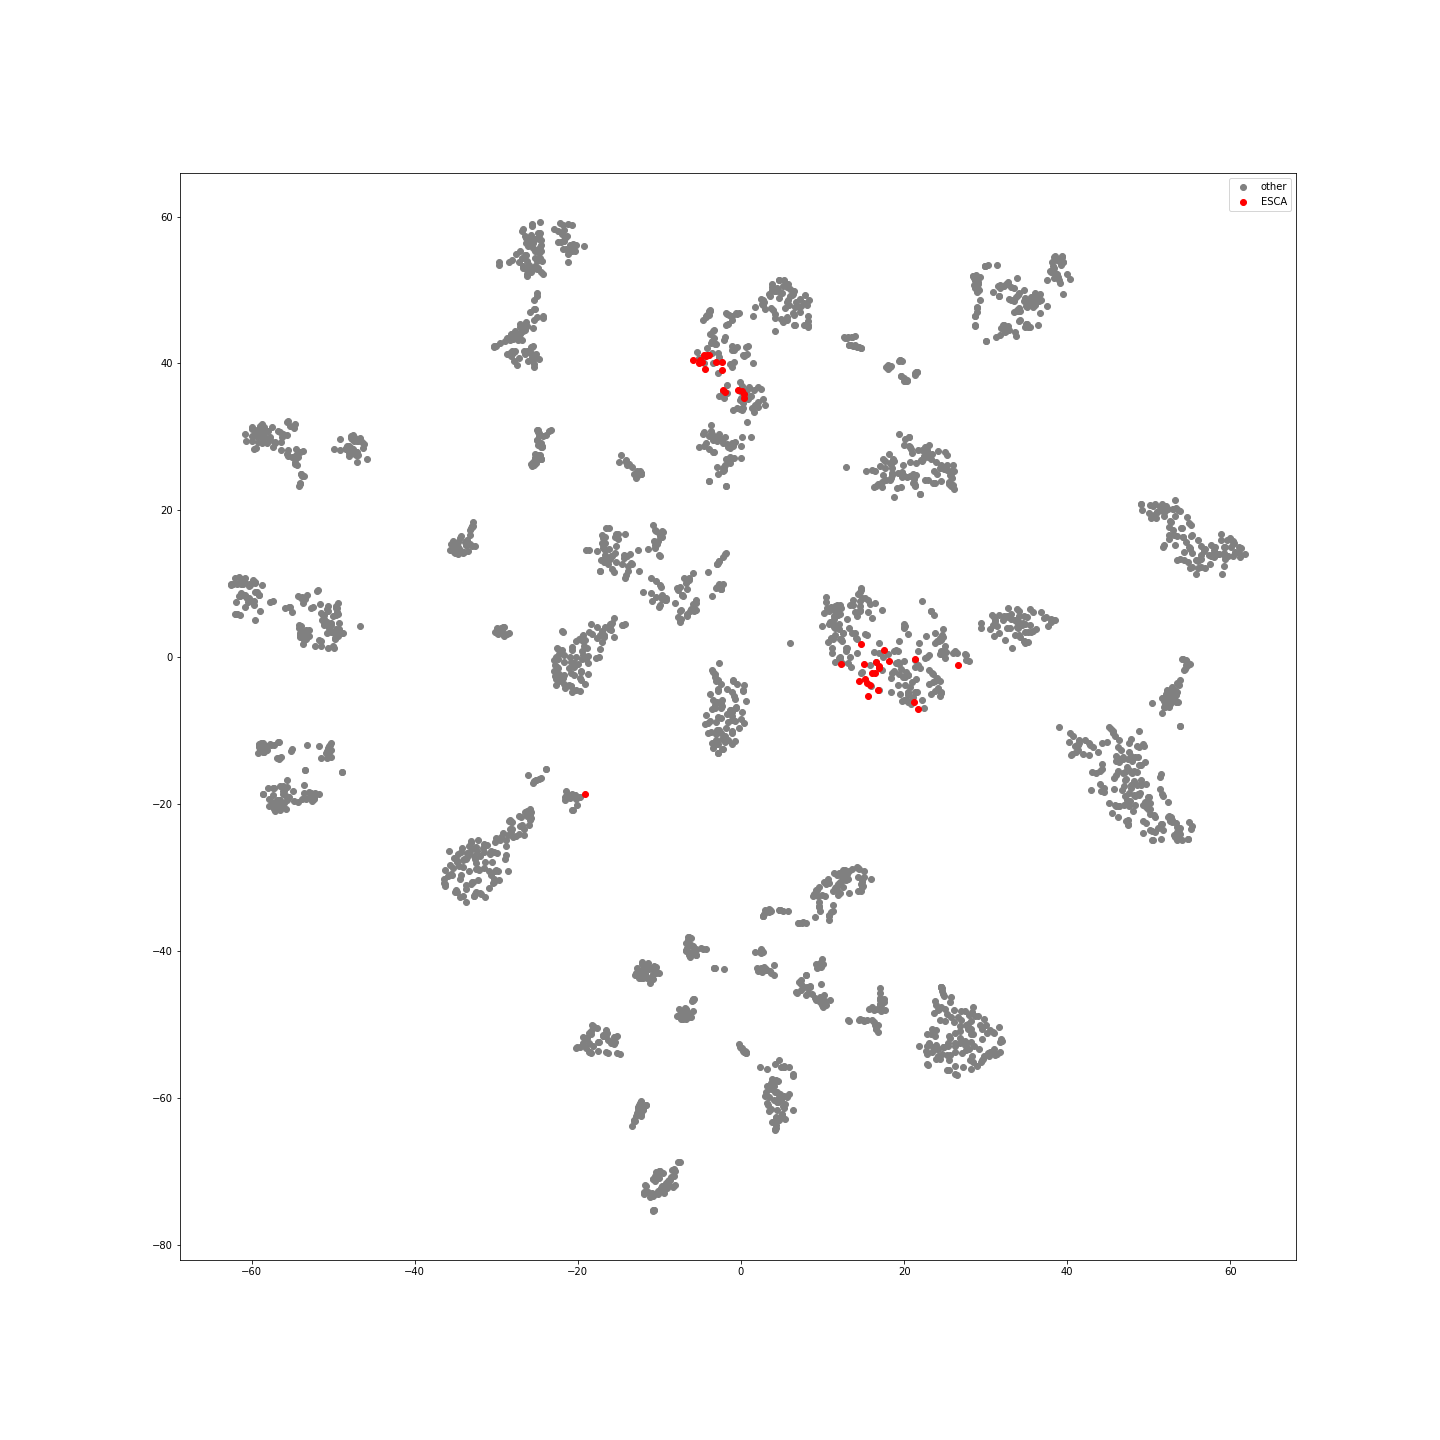


Supplementary Figure 36: ESCA Samples in Latent Space


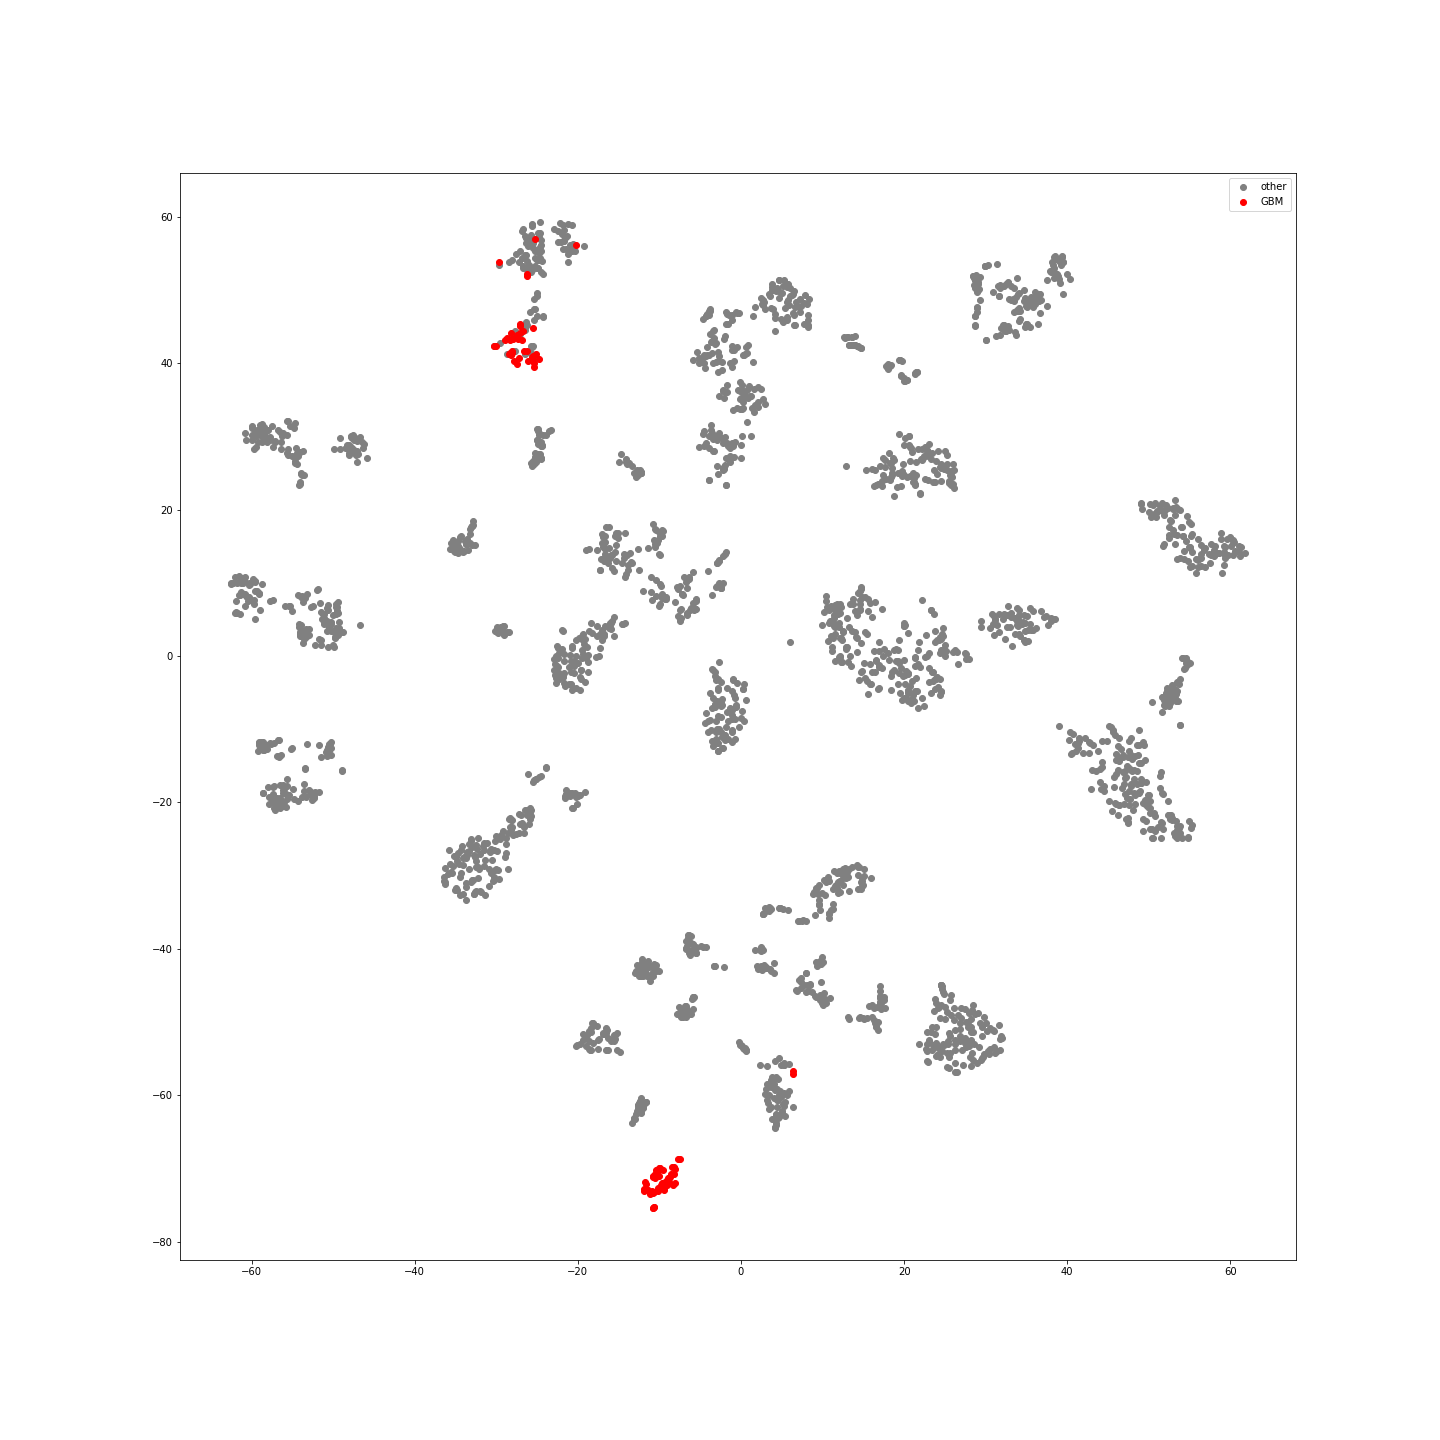


Supplementary Figure 37:GBM Samples in Latent Space


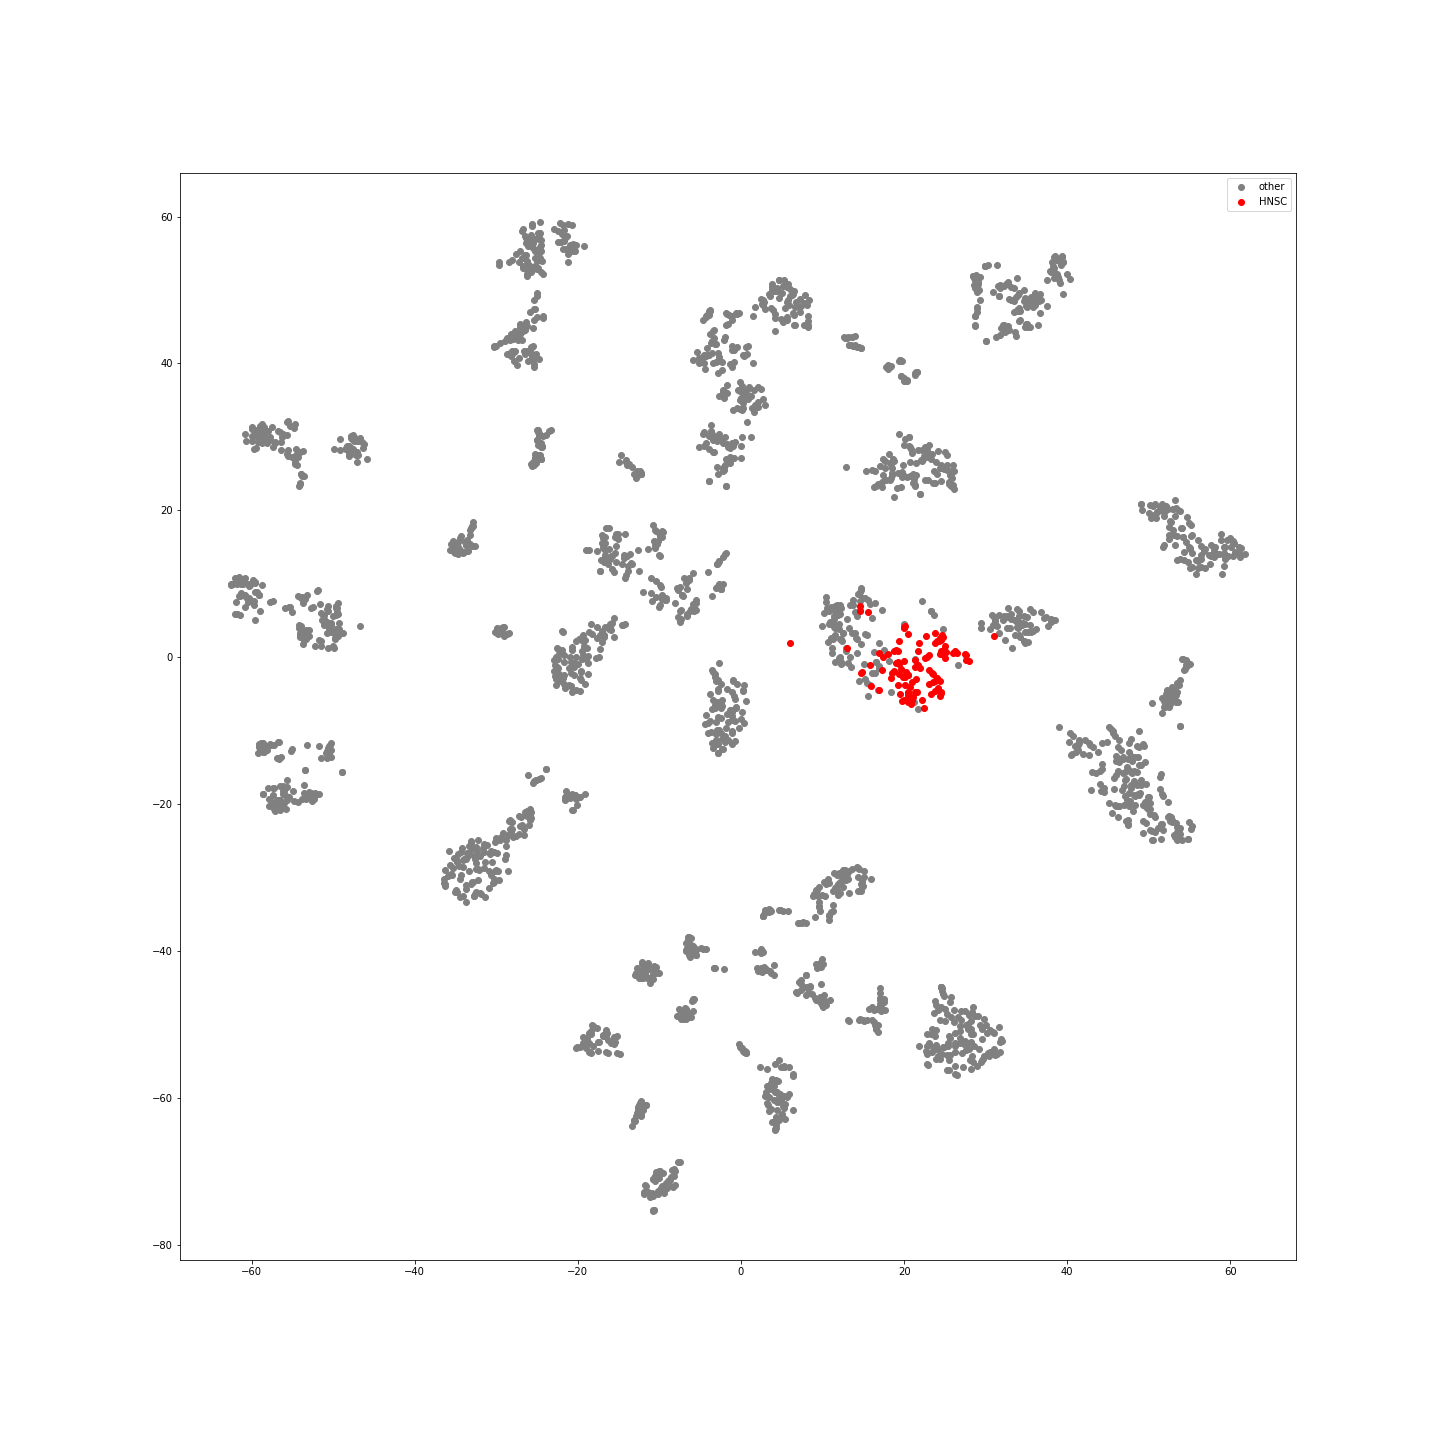


Supplementary Figure 38: HNSC Samples in Latent Space


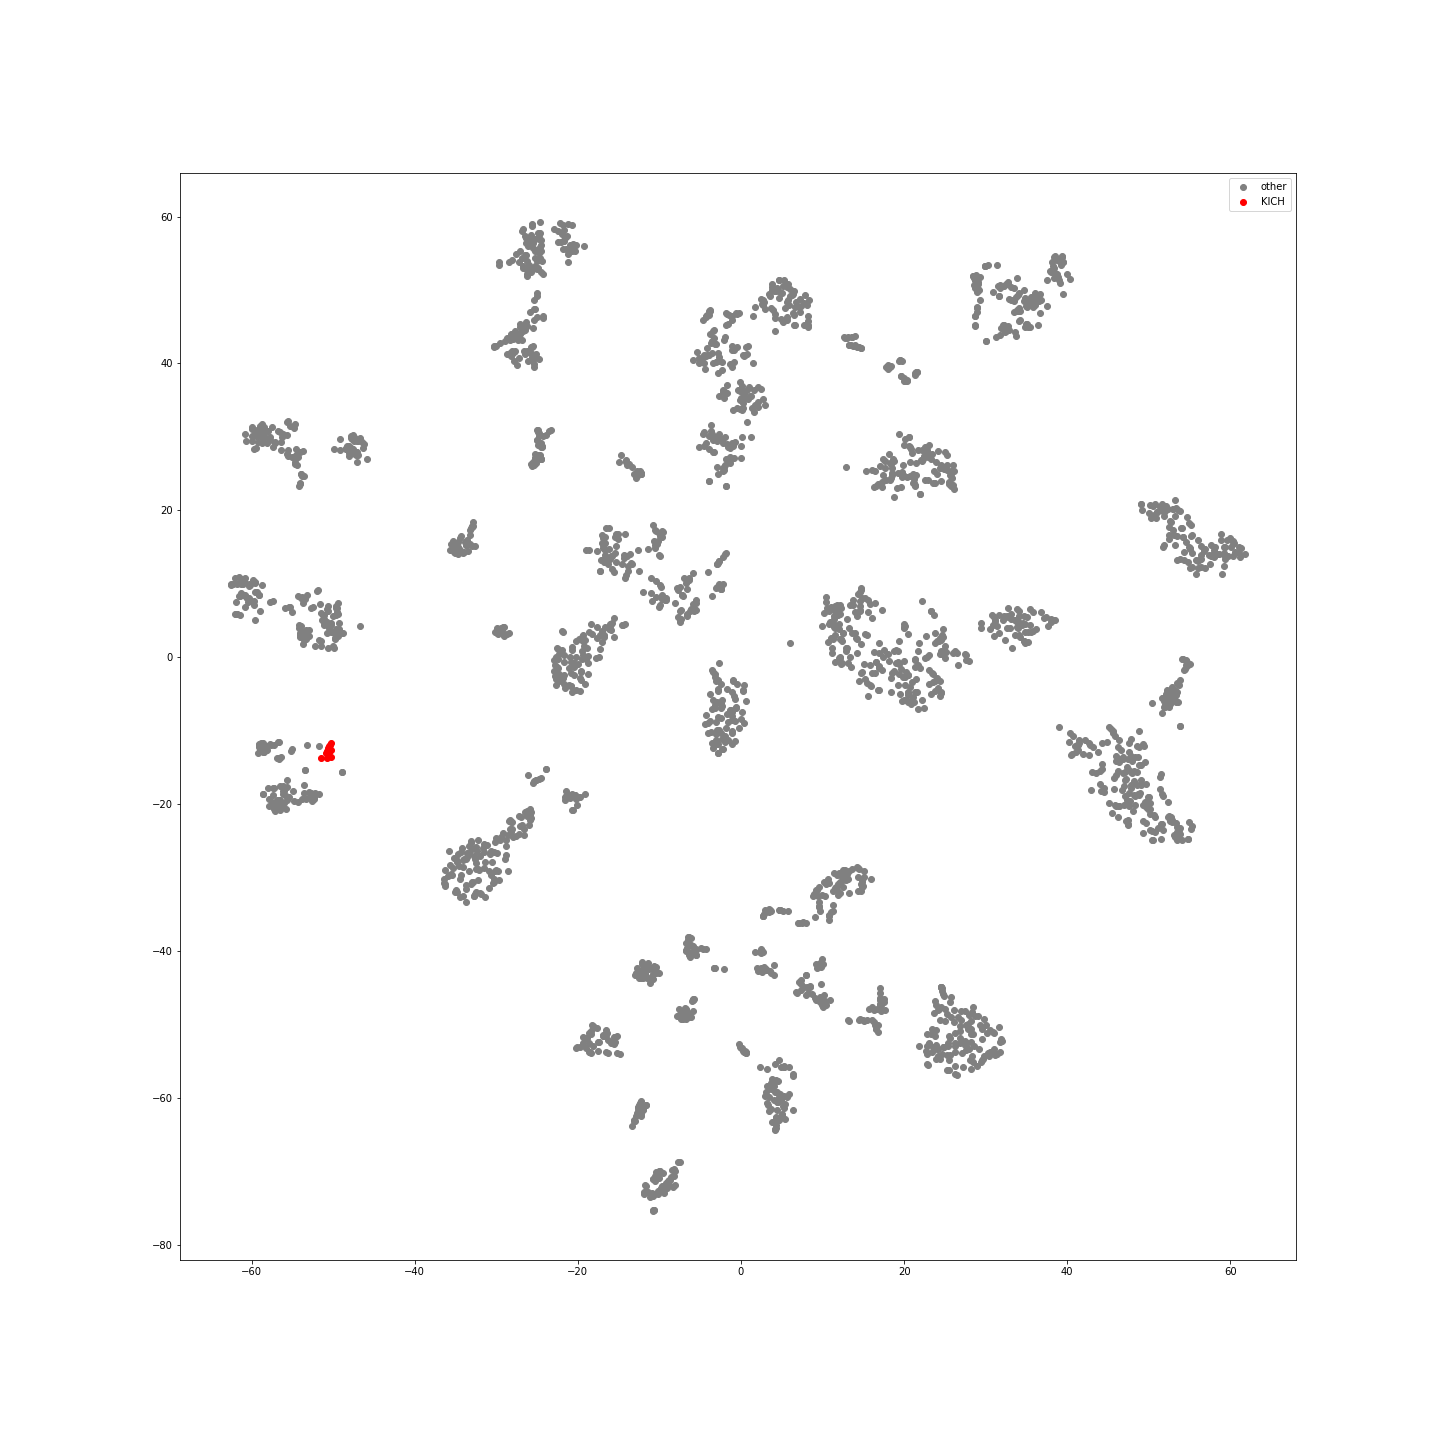


Supplementary Figure 39:KCH Samples in Latent Space


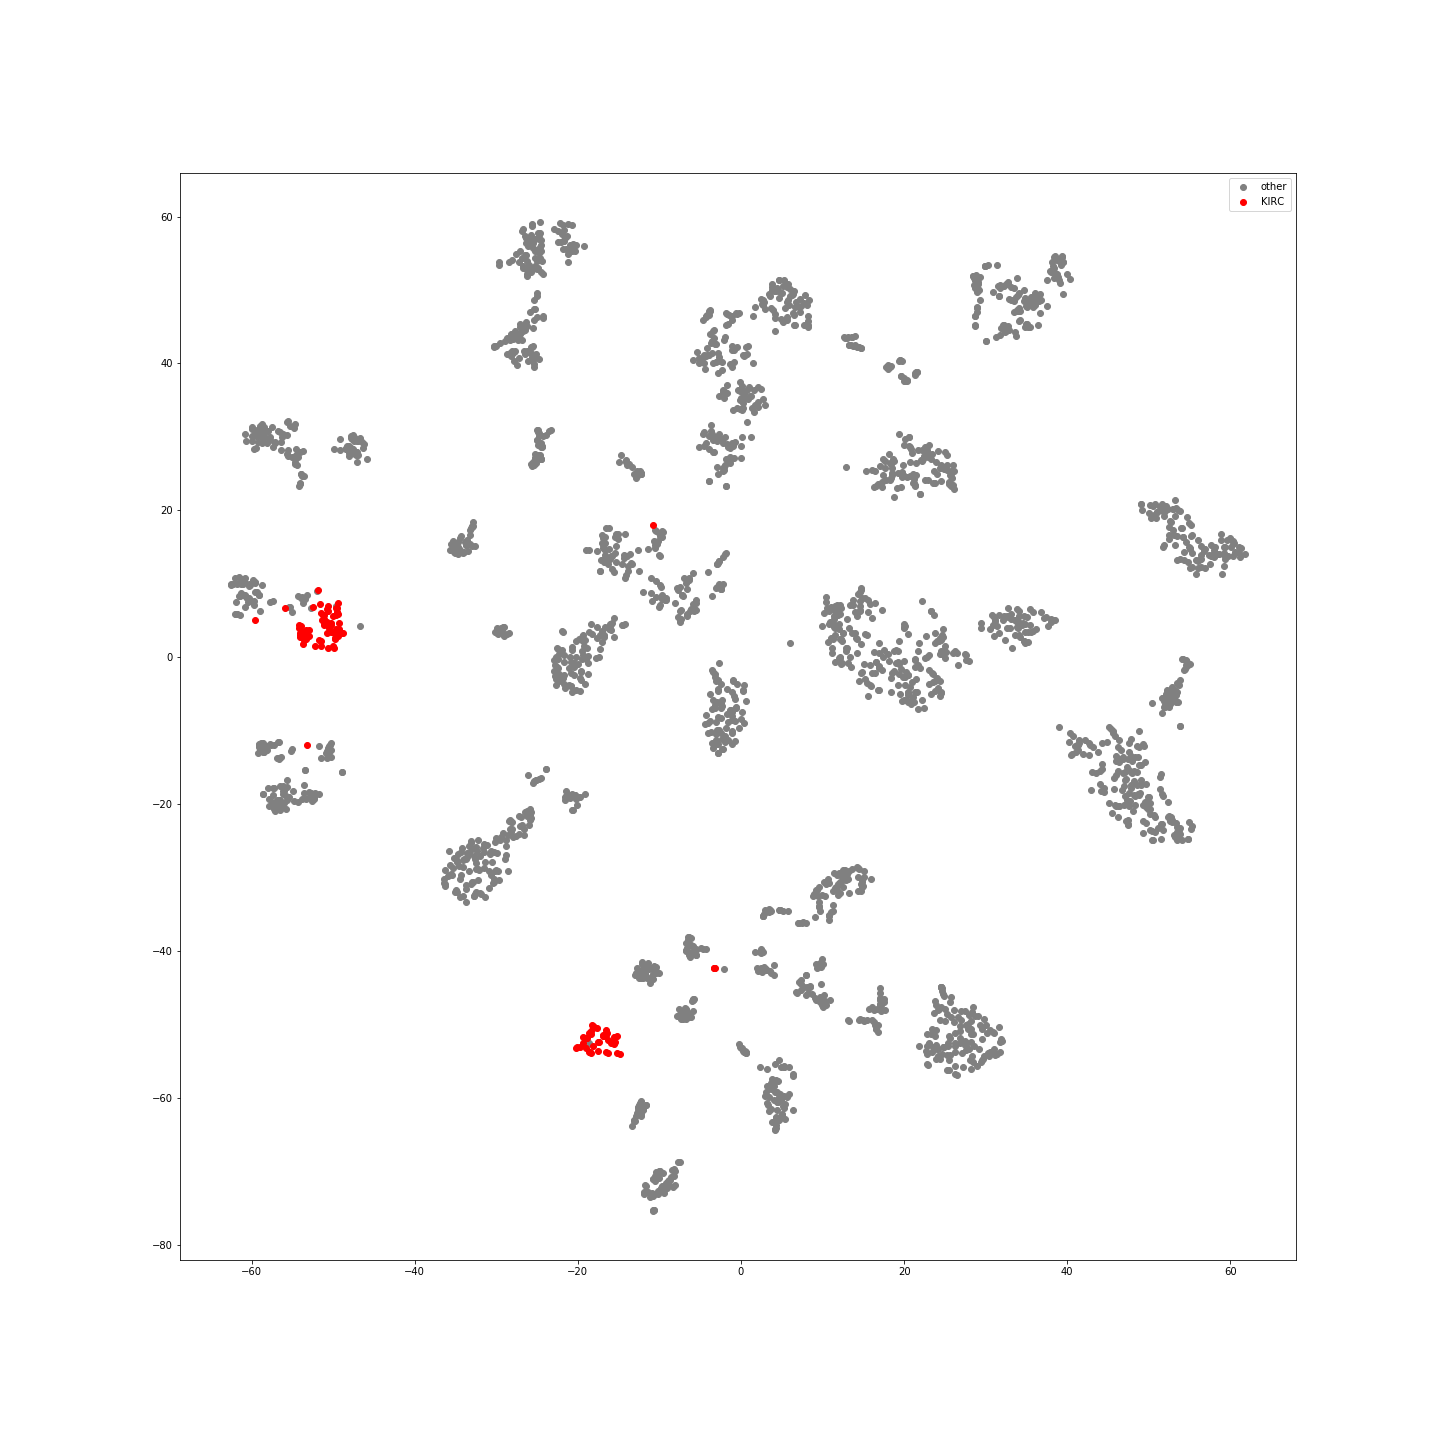


Supplementary Figure 40:KIRC Samples in Latent Space


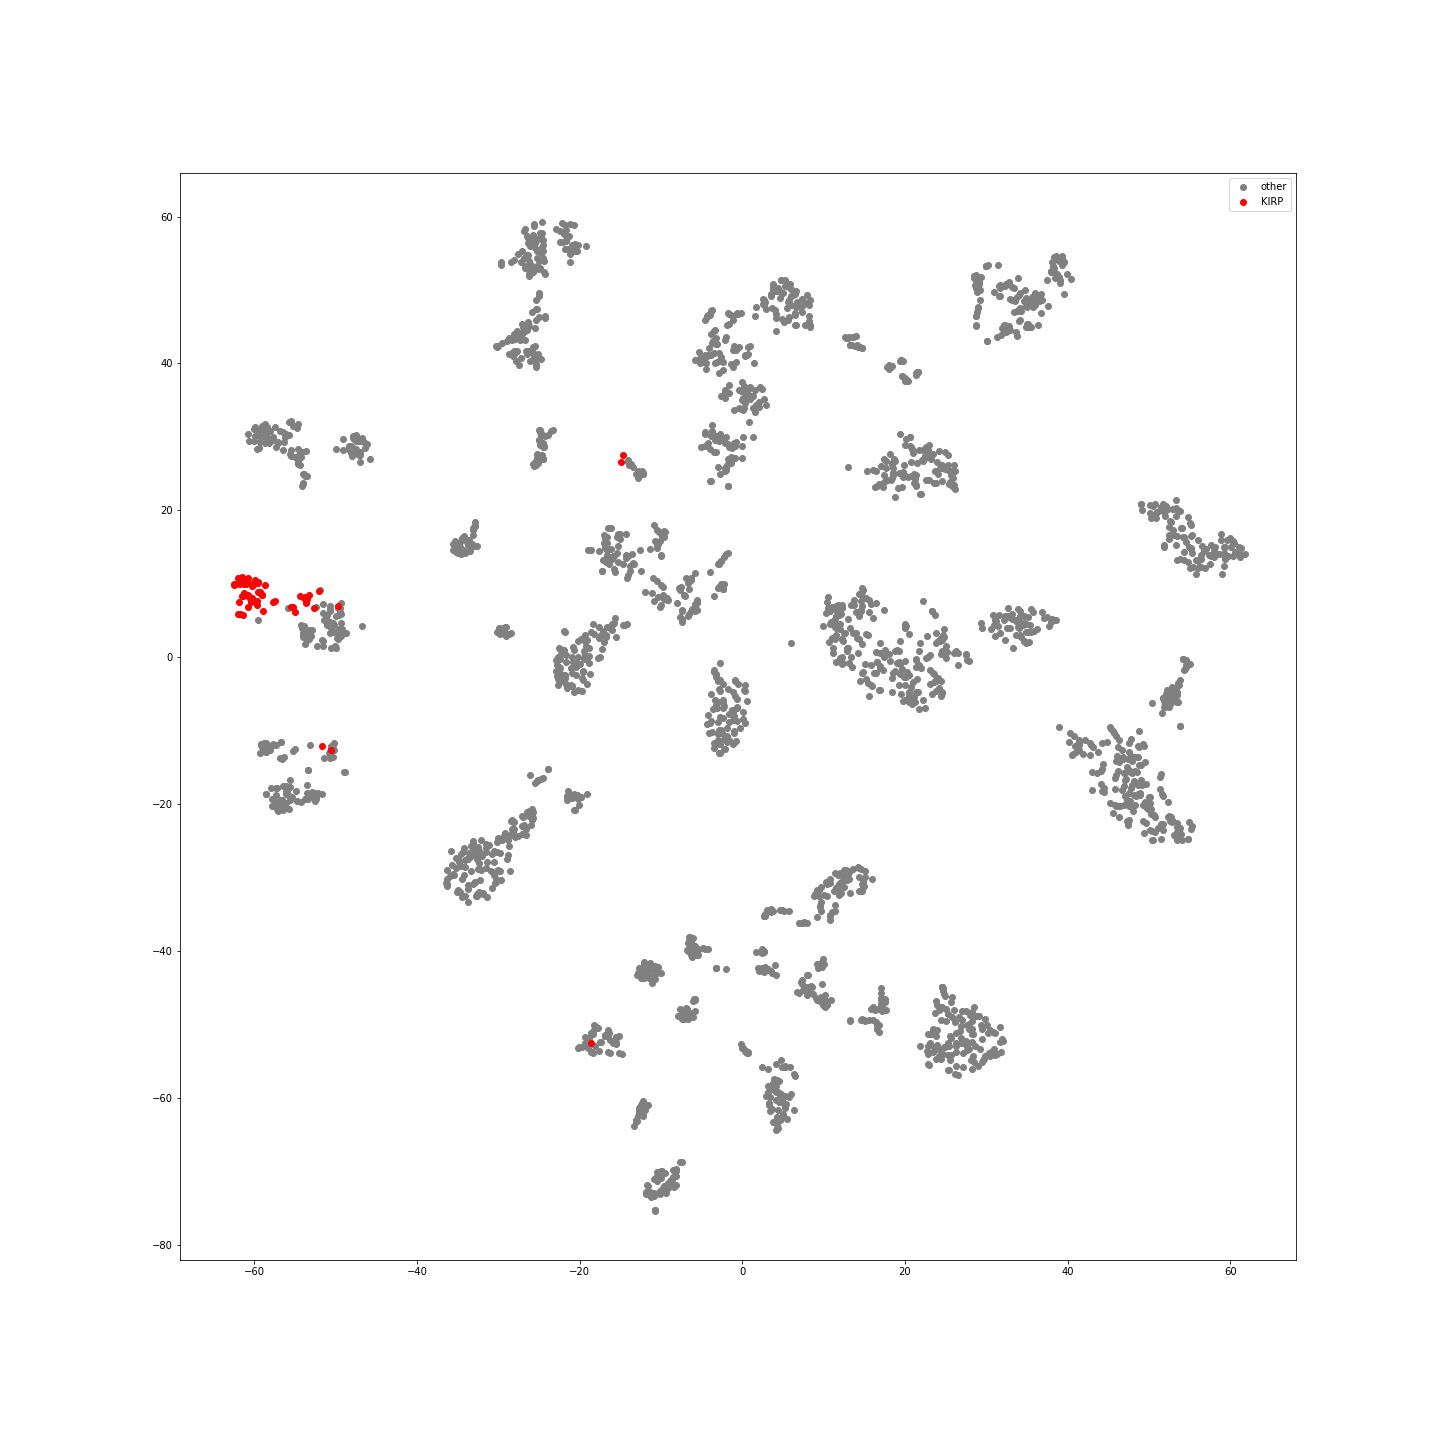


Supplementary Figure 41: KIRP Samples in Latent Space


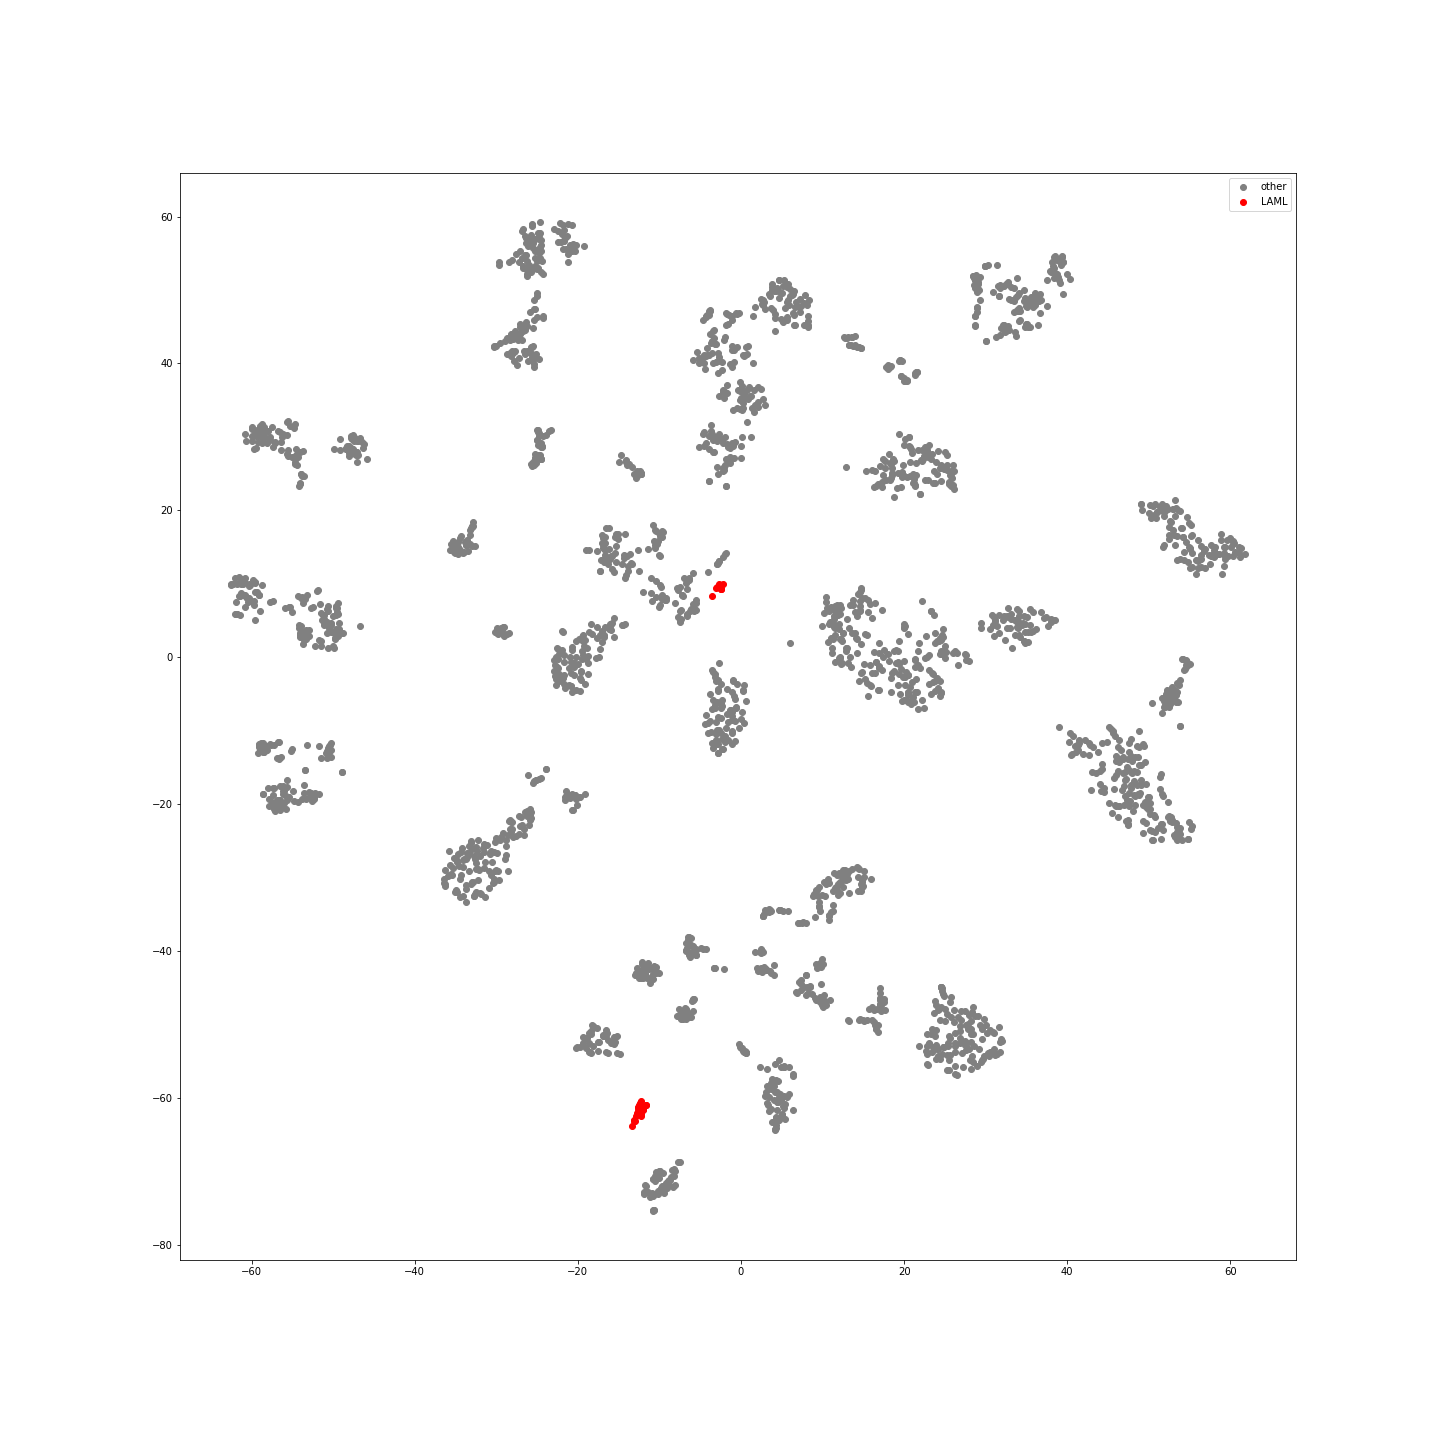


Supplementary Figure 42: LAML Samples in Latent Space


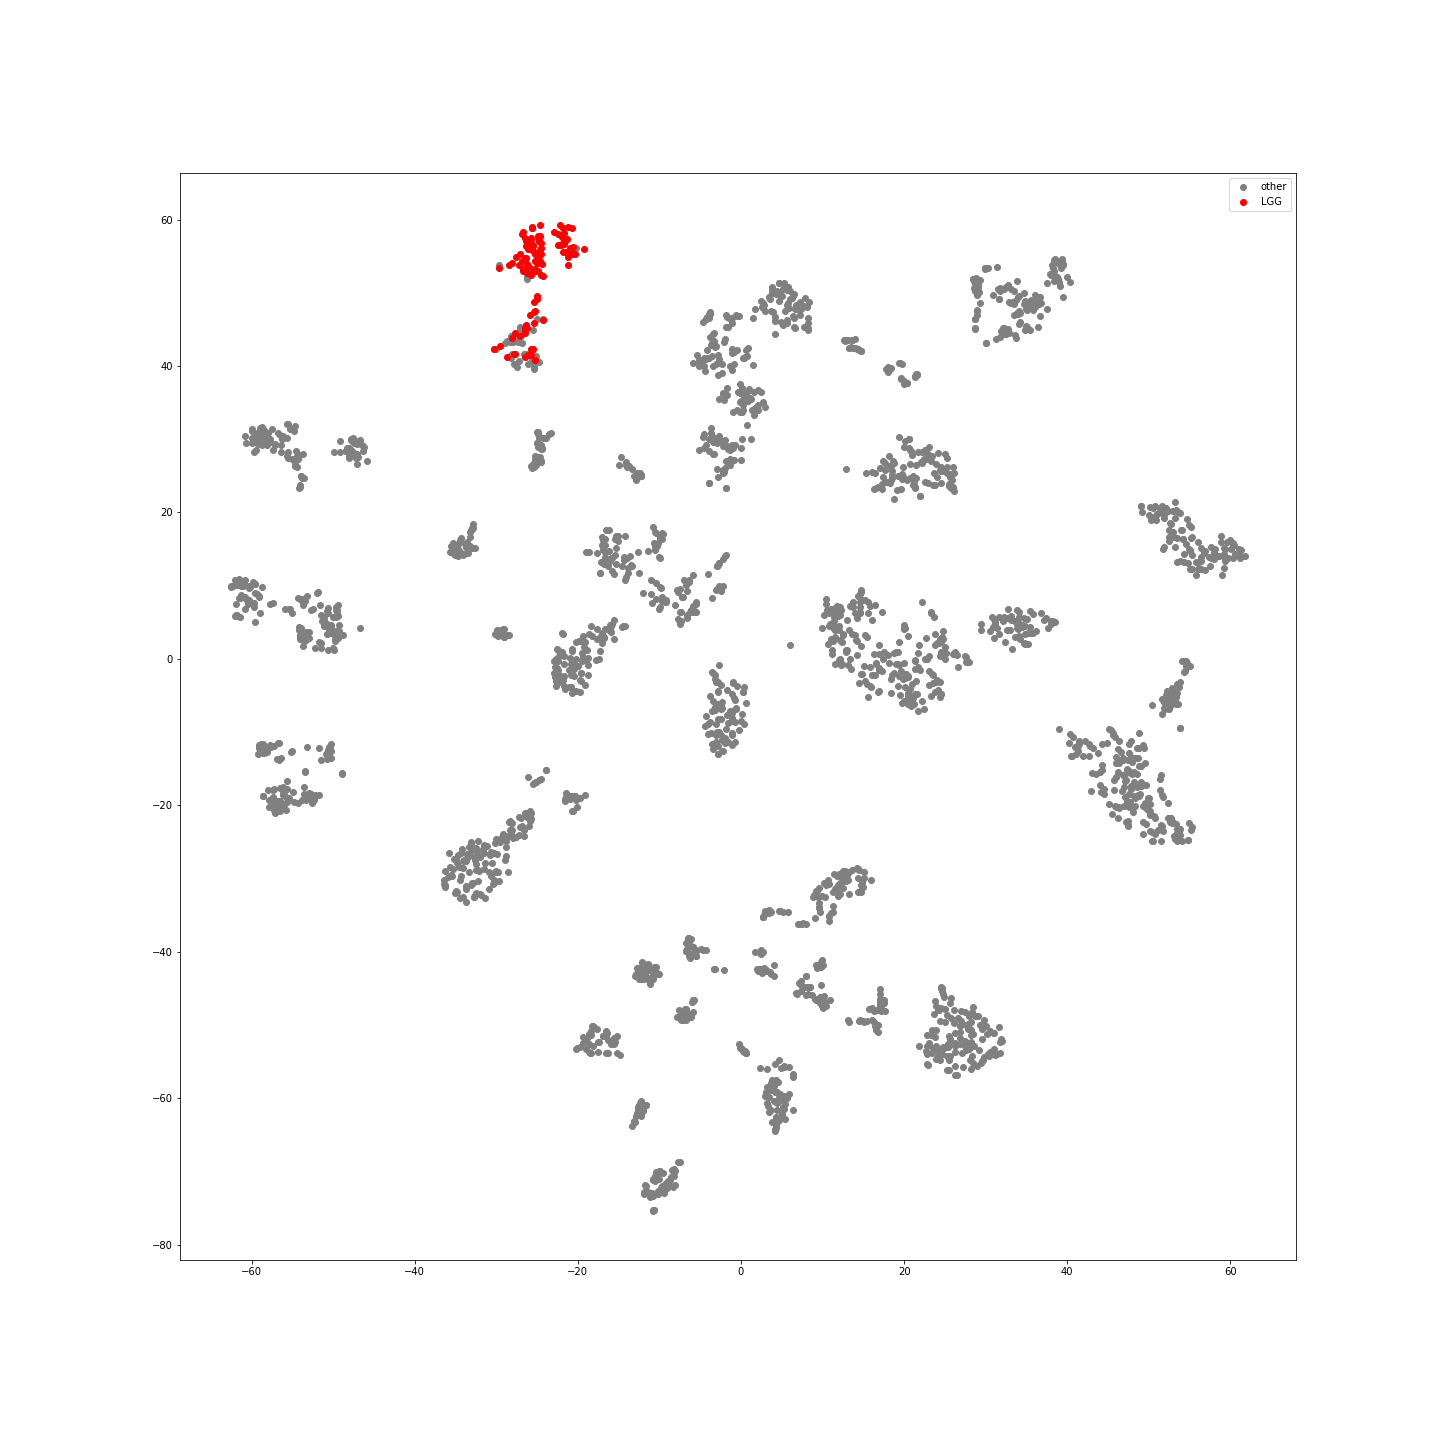


Supplementary Figure 43: LGG Samples in Latent Space


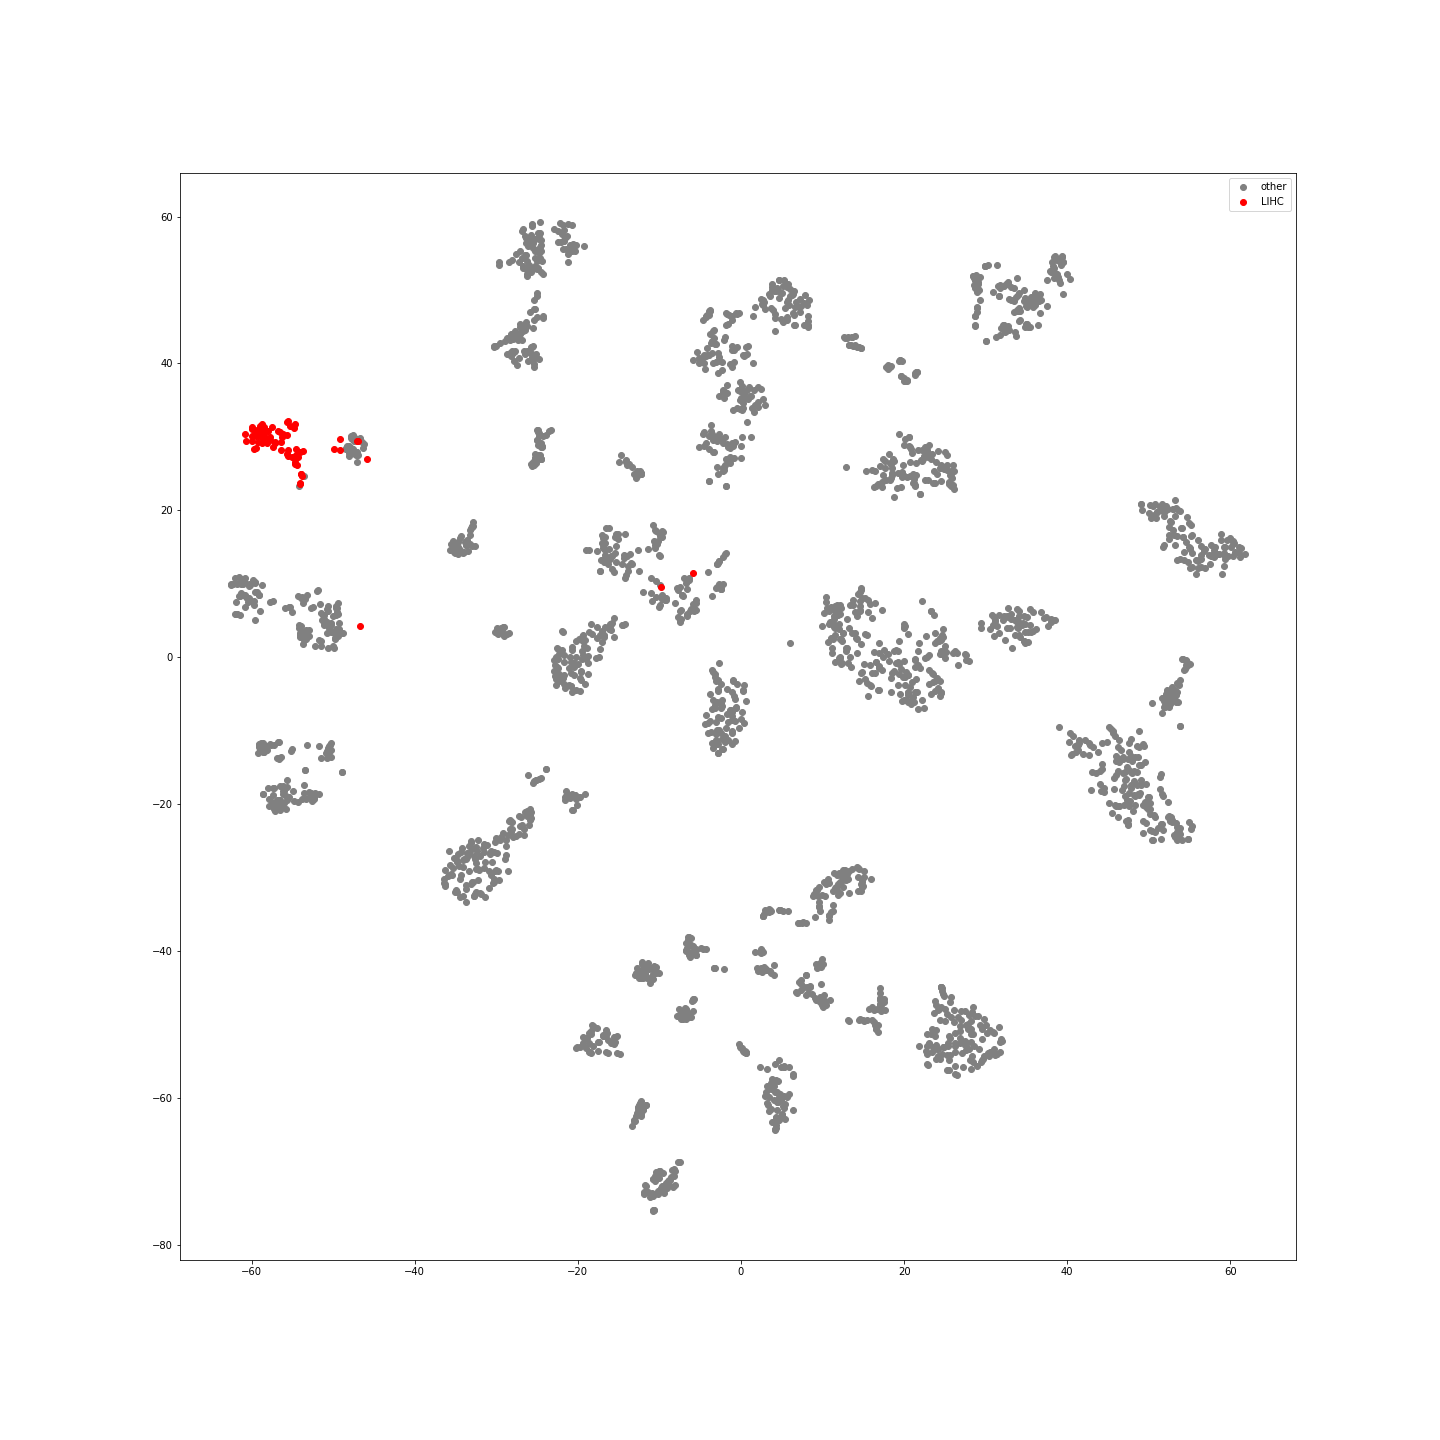


Supplementary Figure 44: LIHC Samples in Latent Space


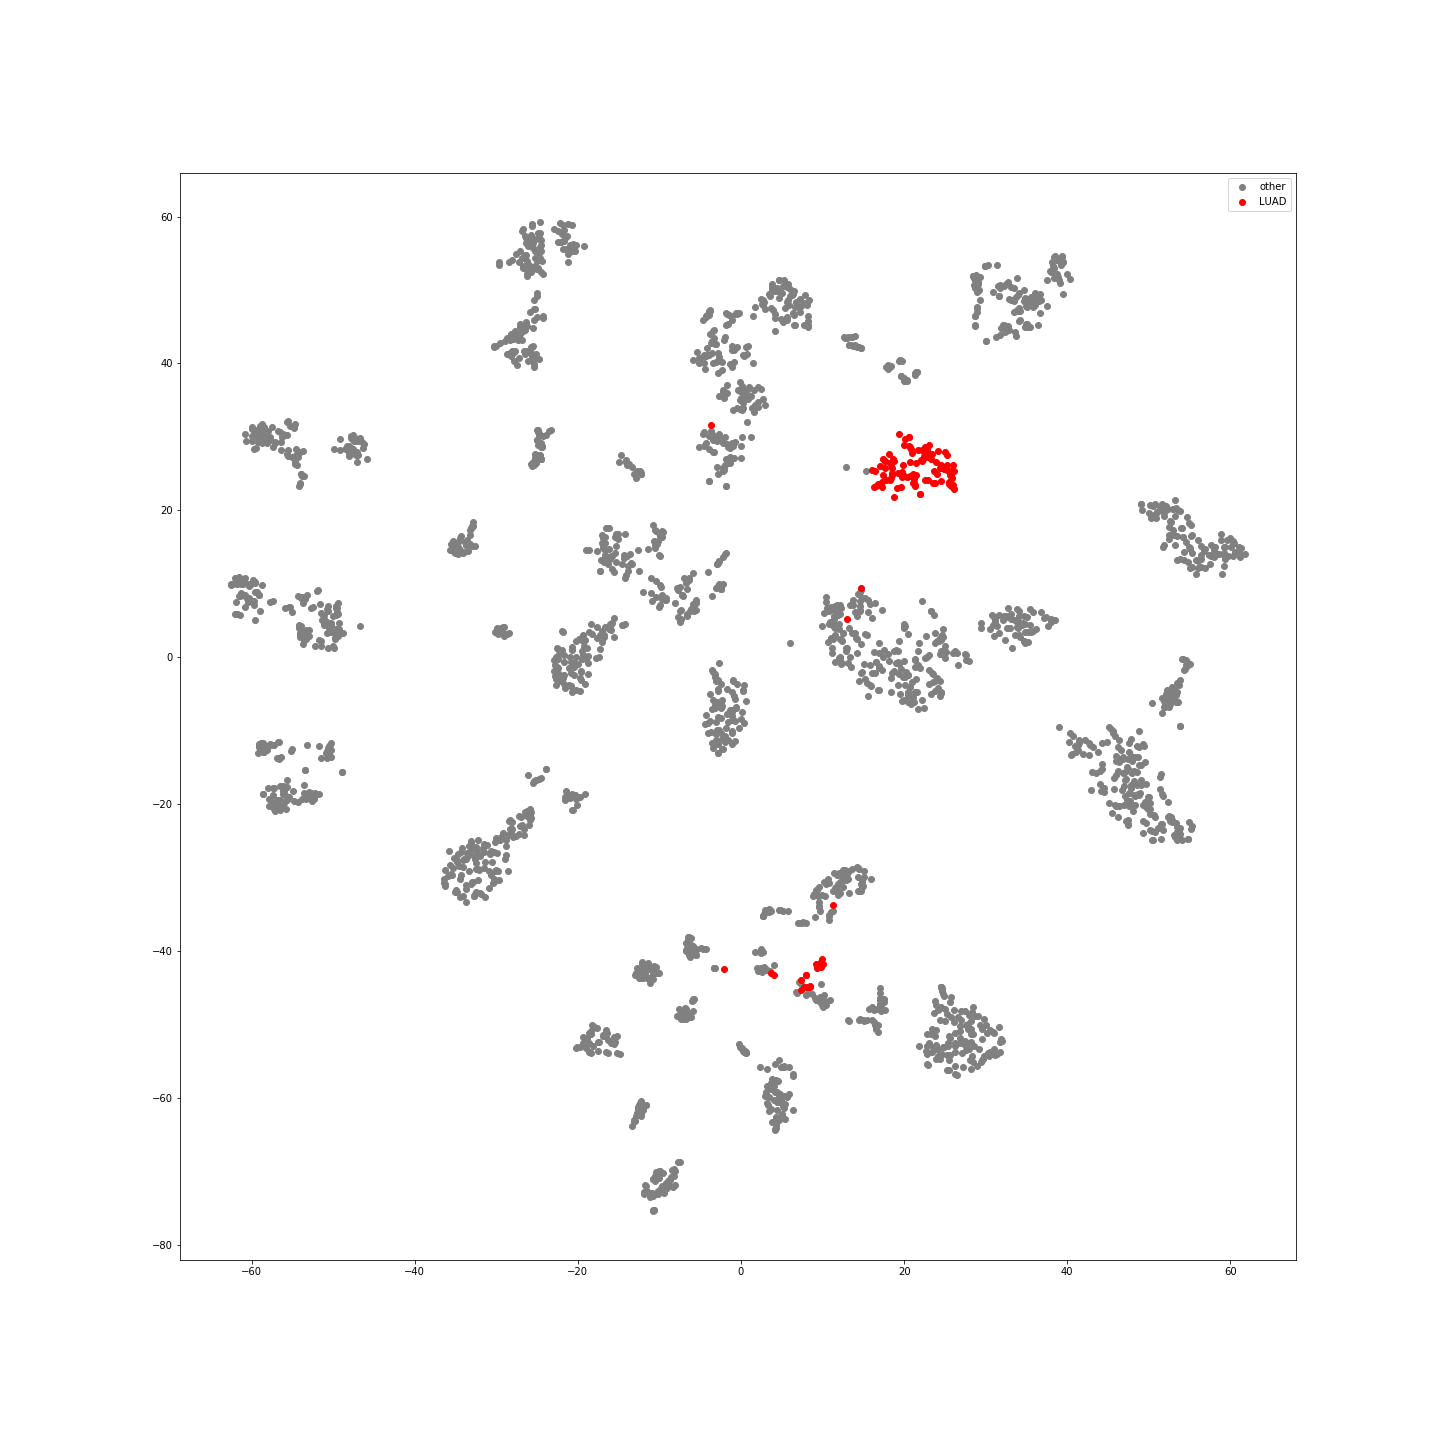


Supplementary Figure 45: LUAD Samples in Latent Space


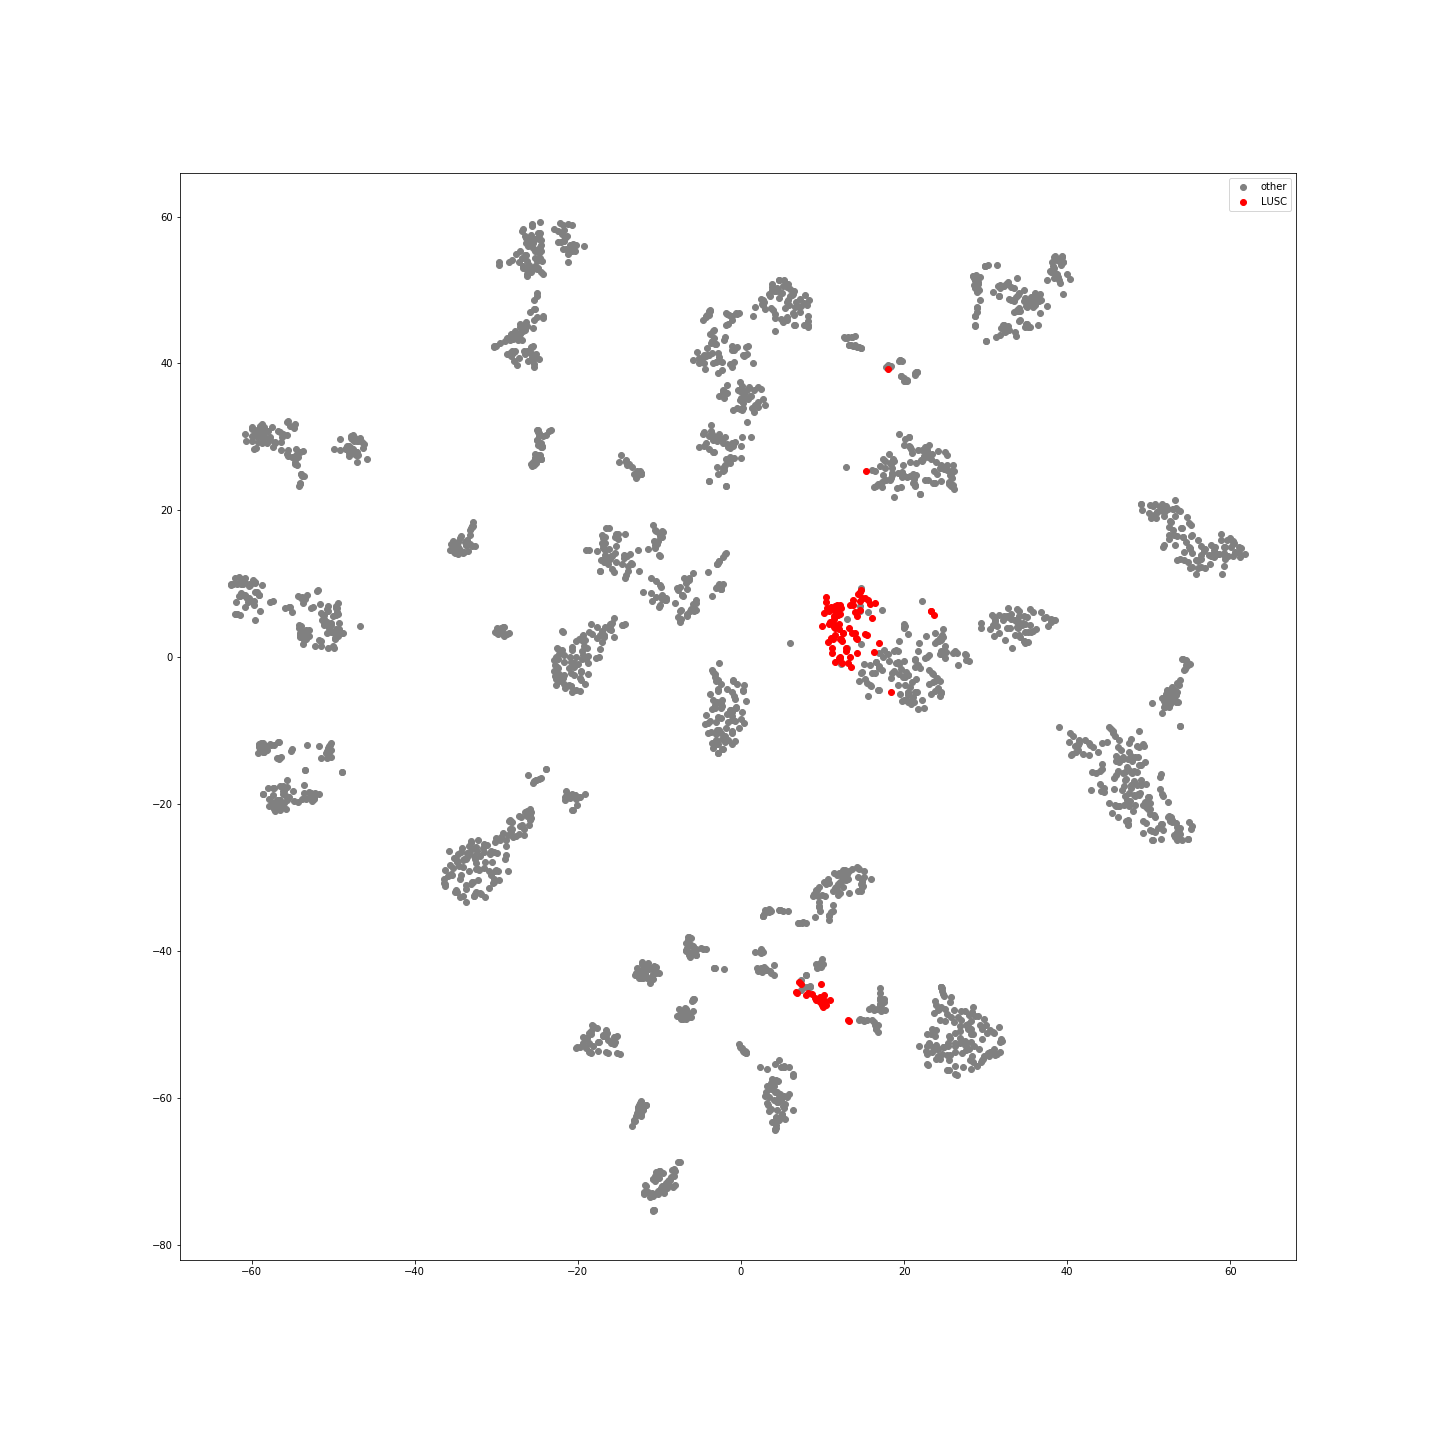


Supplementary Figure 46: LUSC Samples in Latent Space


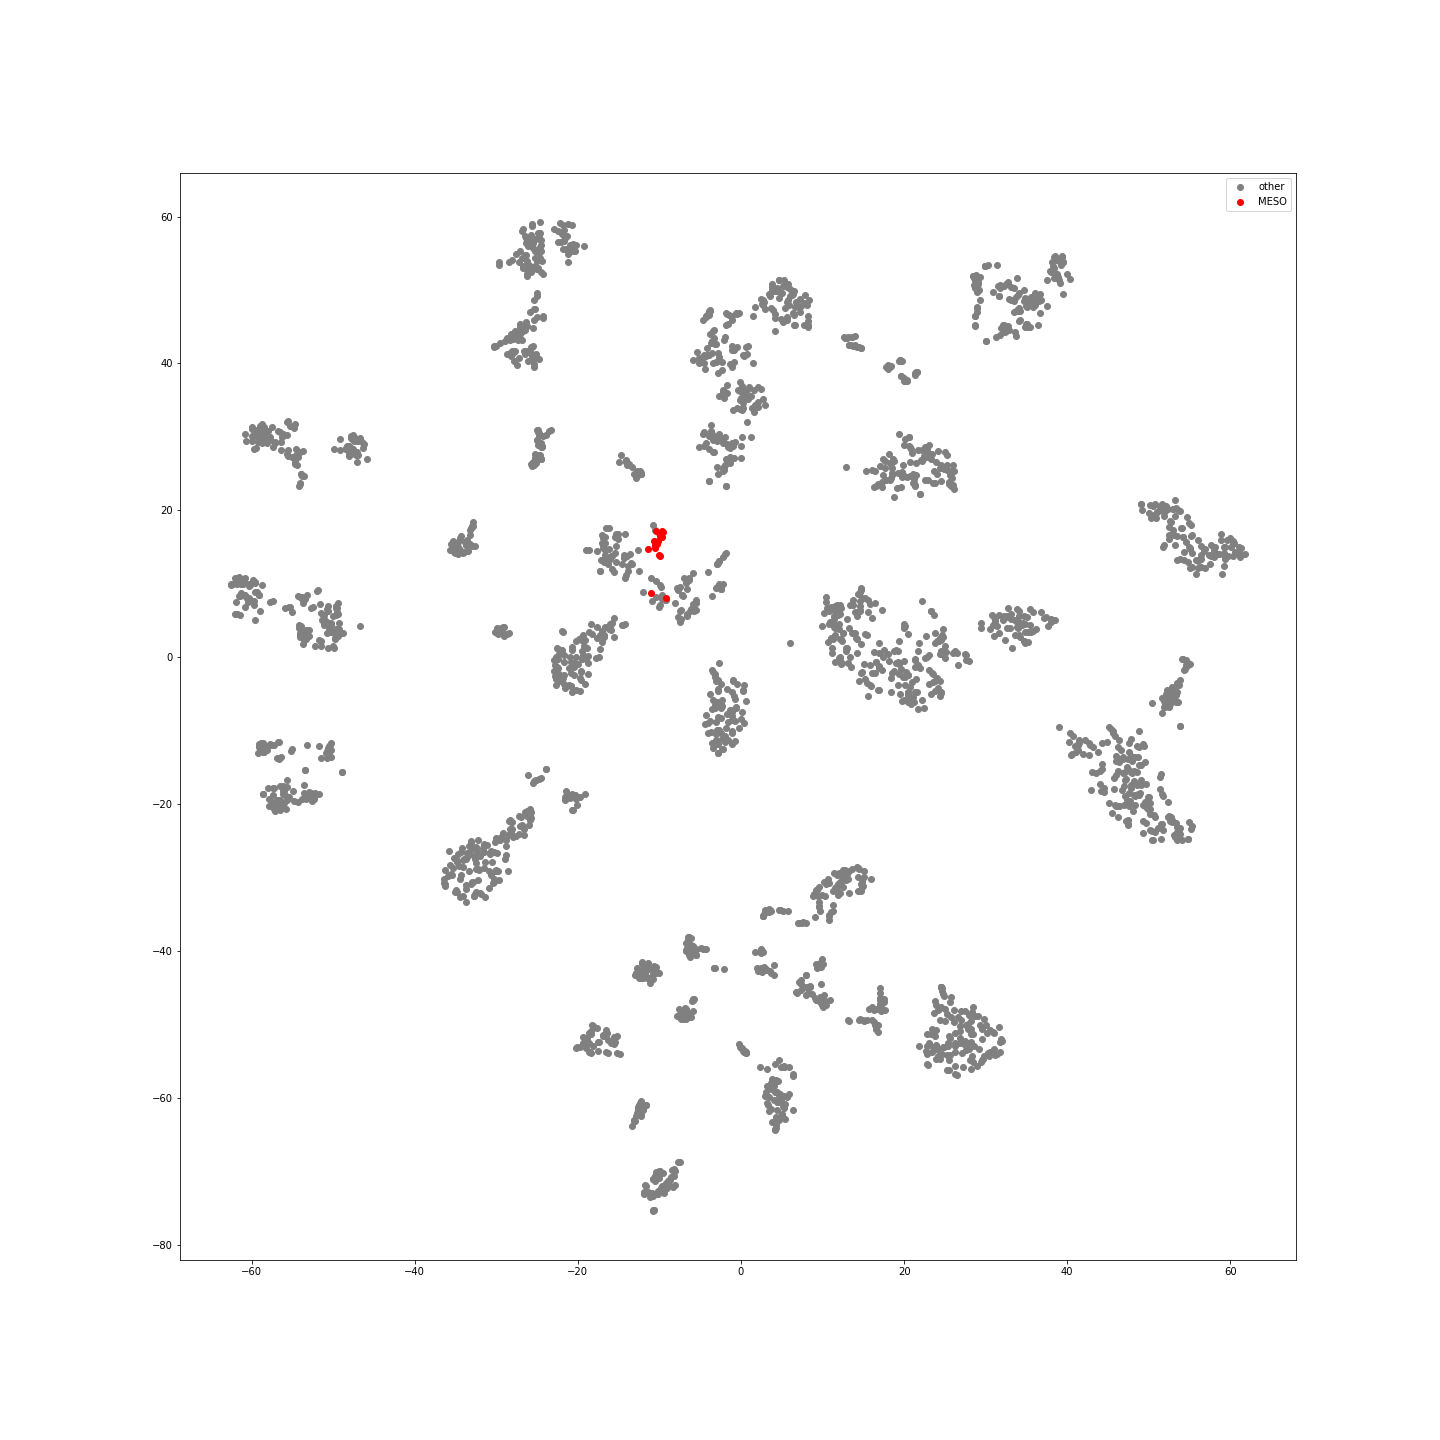


Supplementary Figure 47: MESO Samples in Latent Space


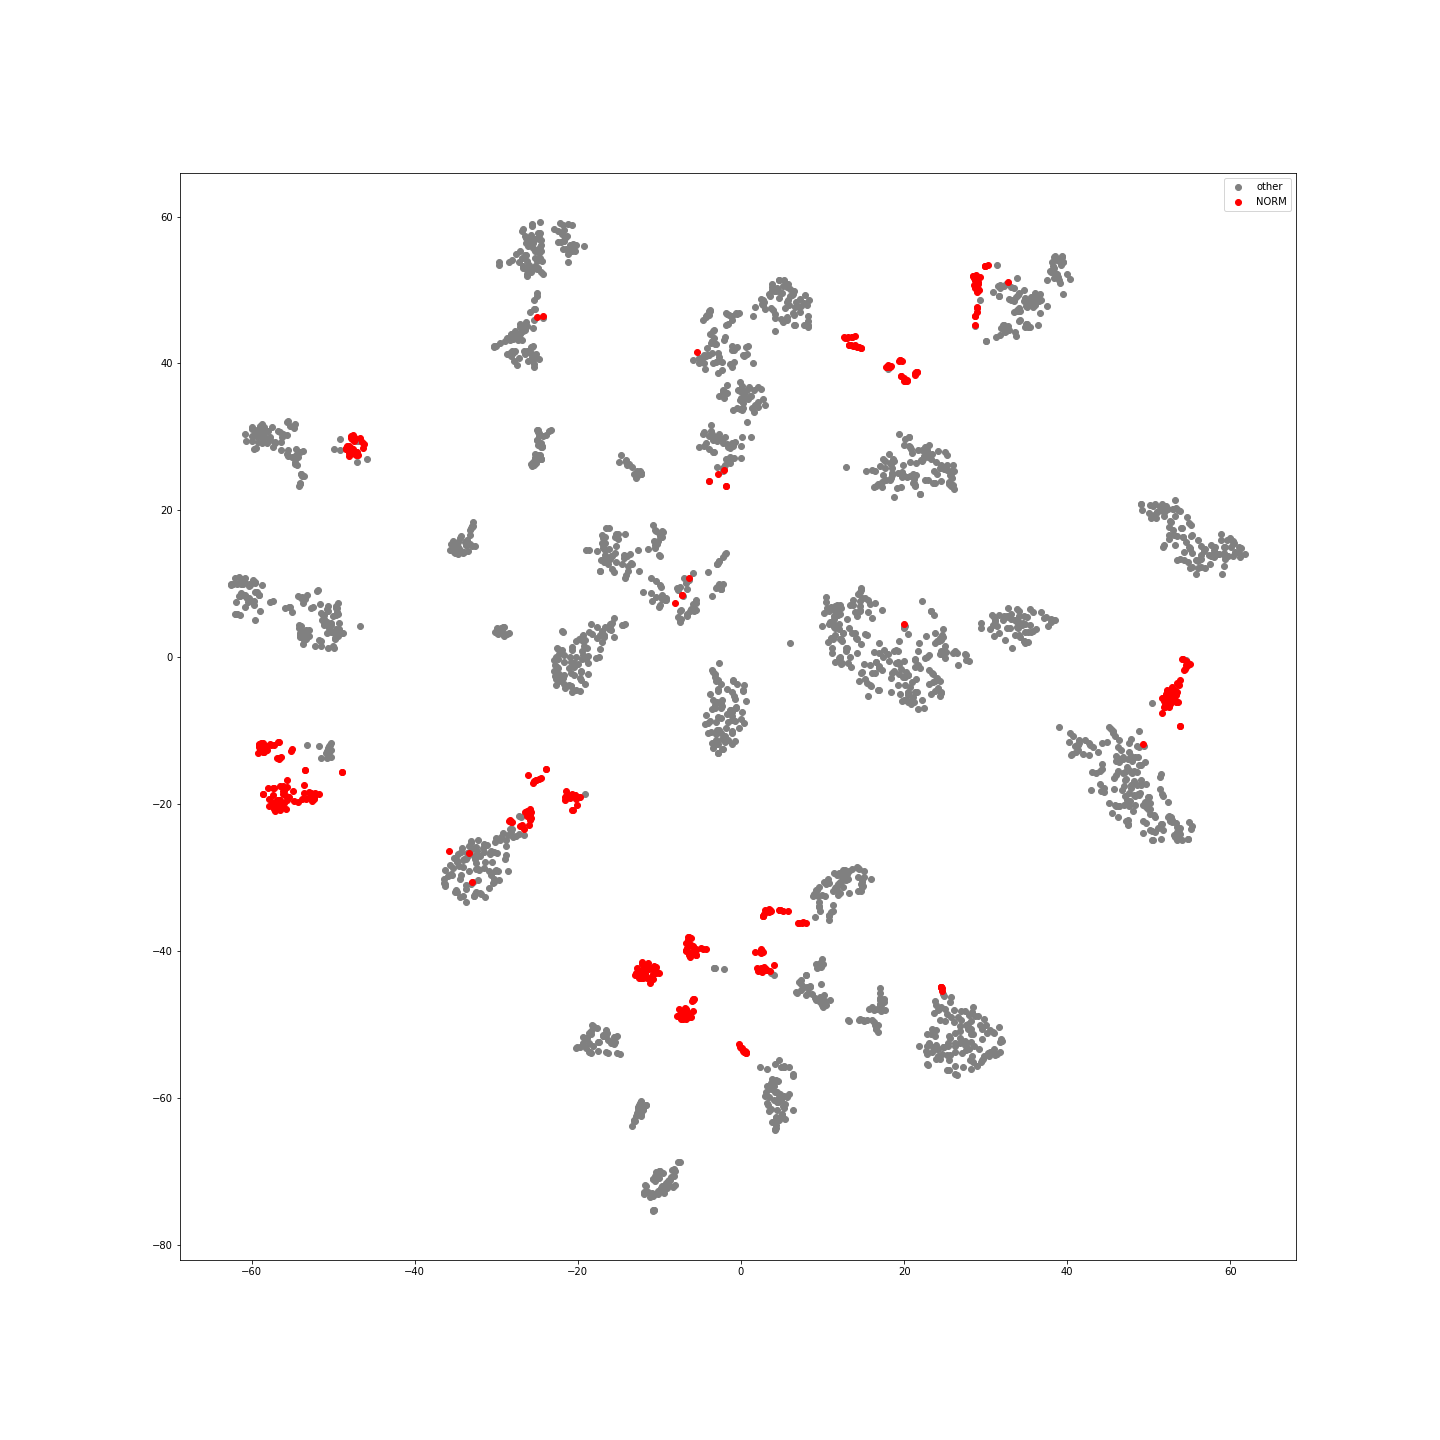


Supplementary Figure 48: NORM Samples in Latent Space


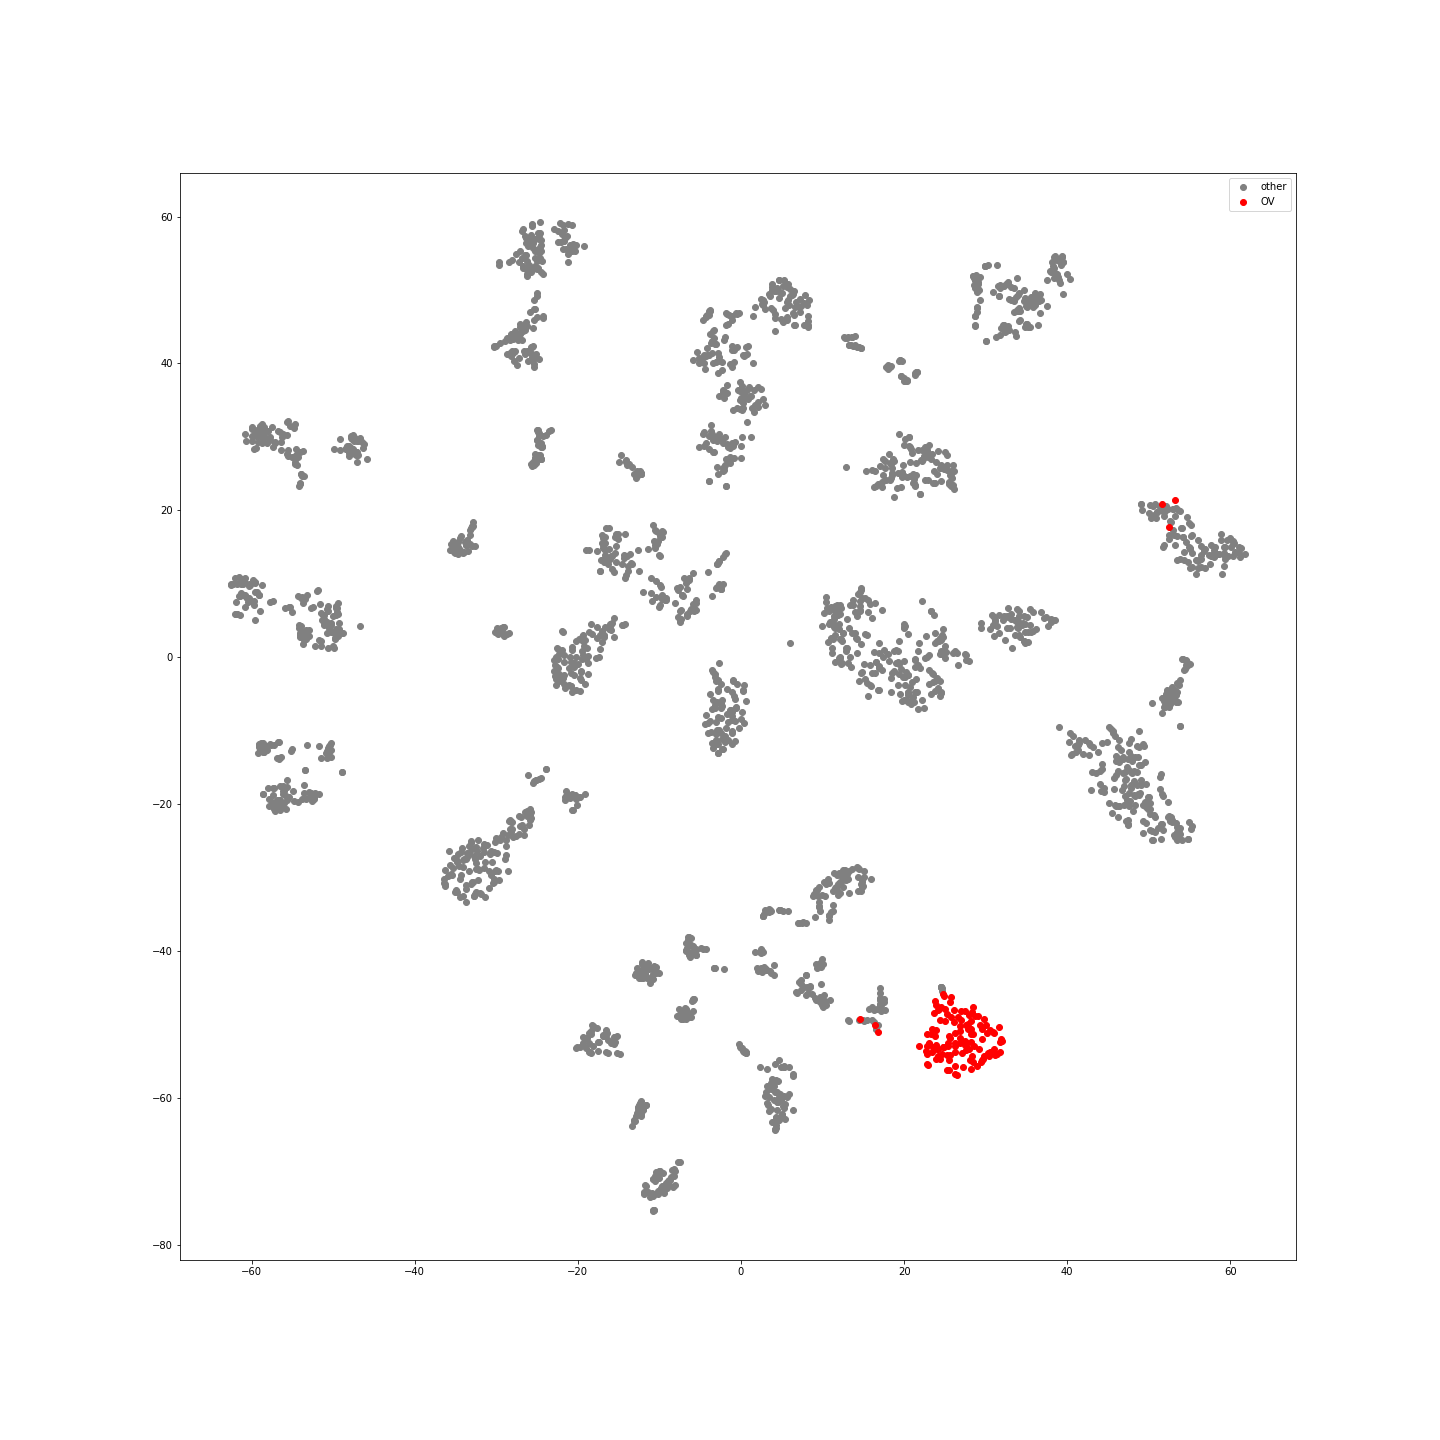


Supplementary Figure 49: OV Samples in Latent Space


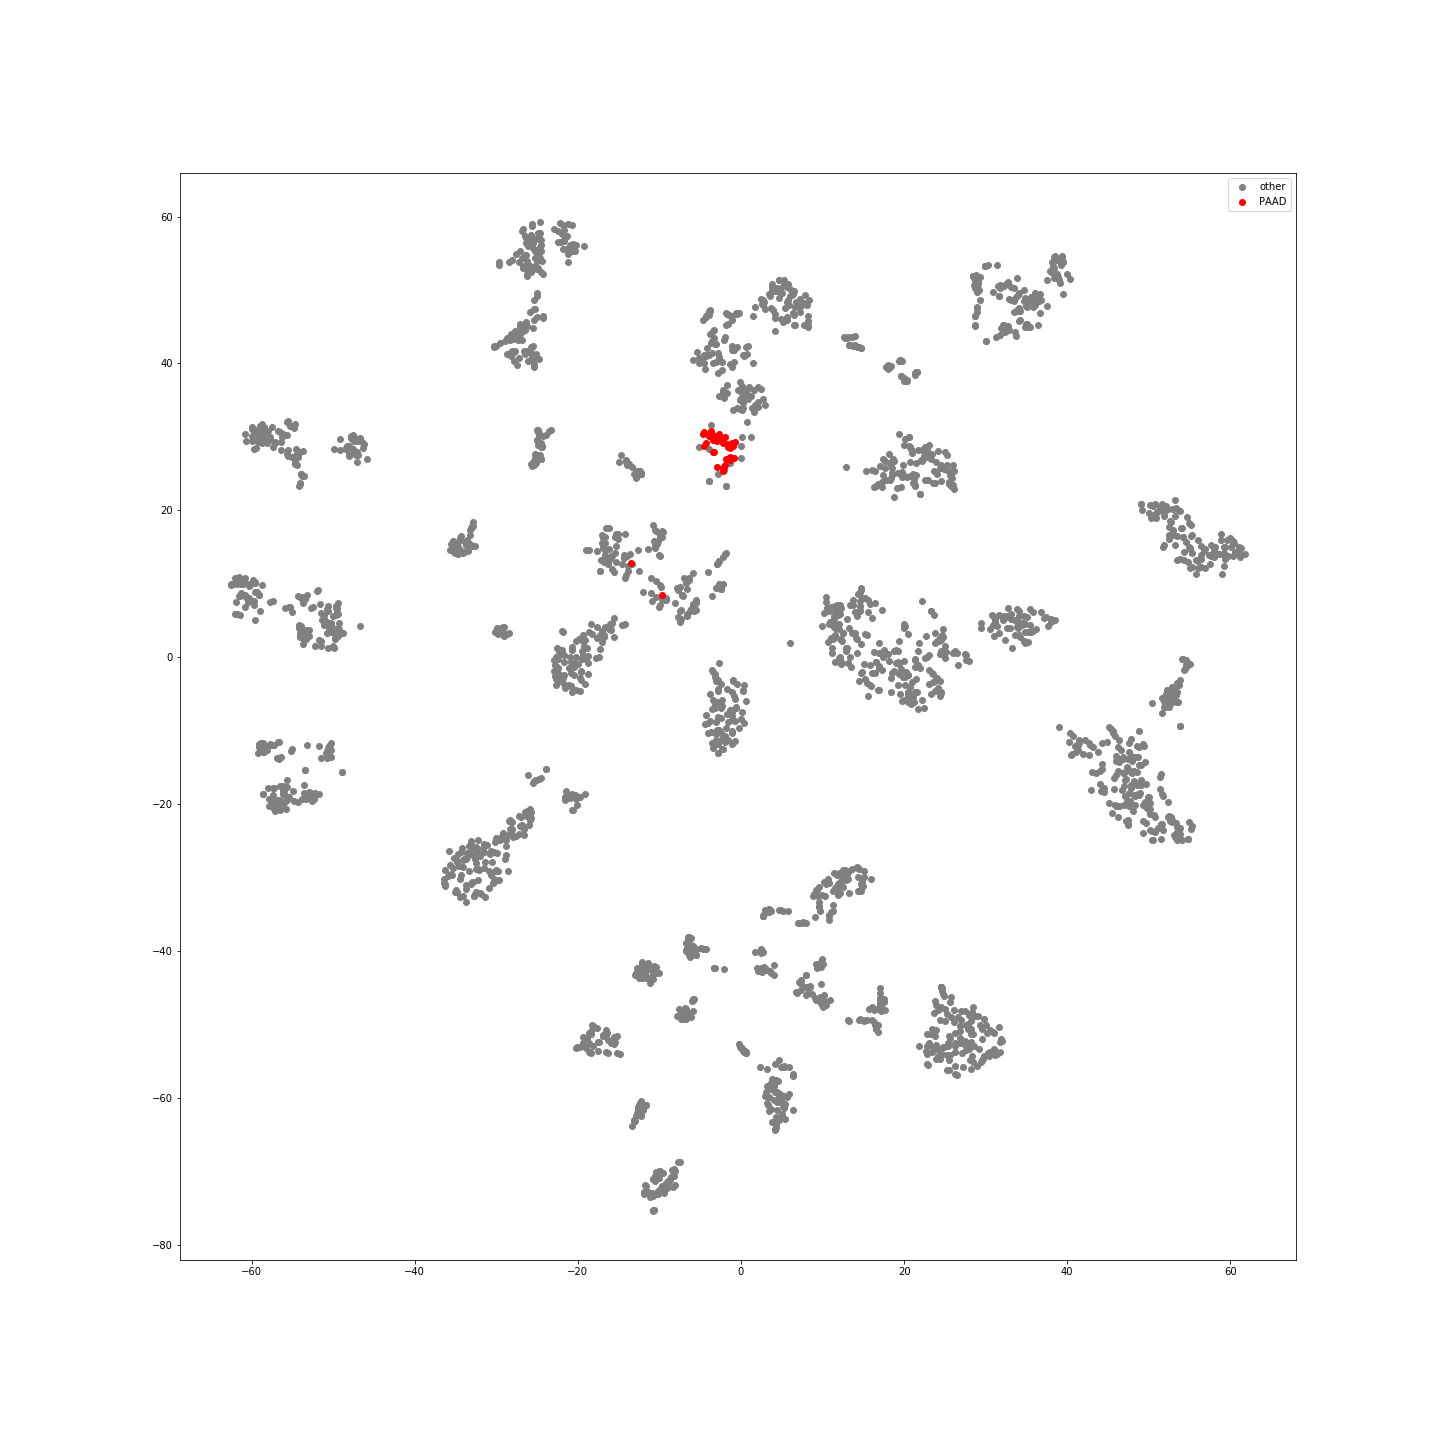


Supplementary Figure 50: PAAD Samples in Latent Space


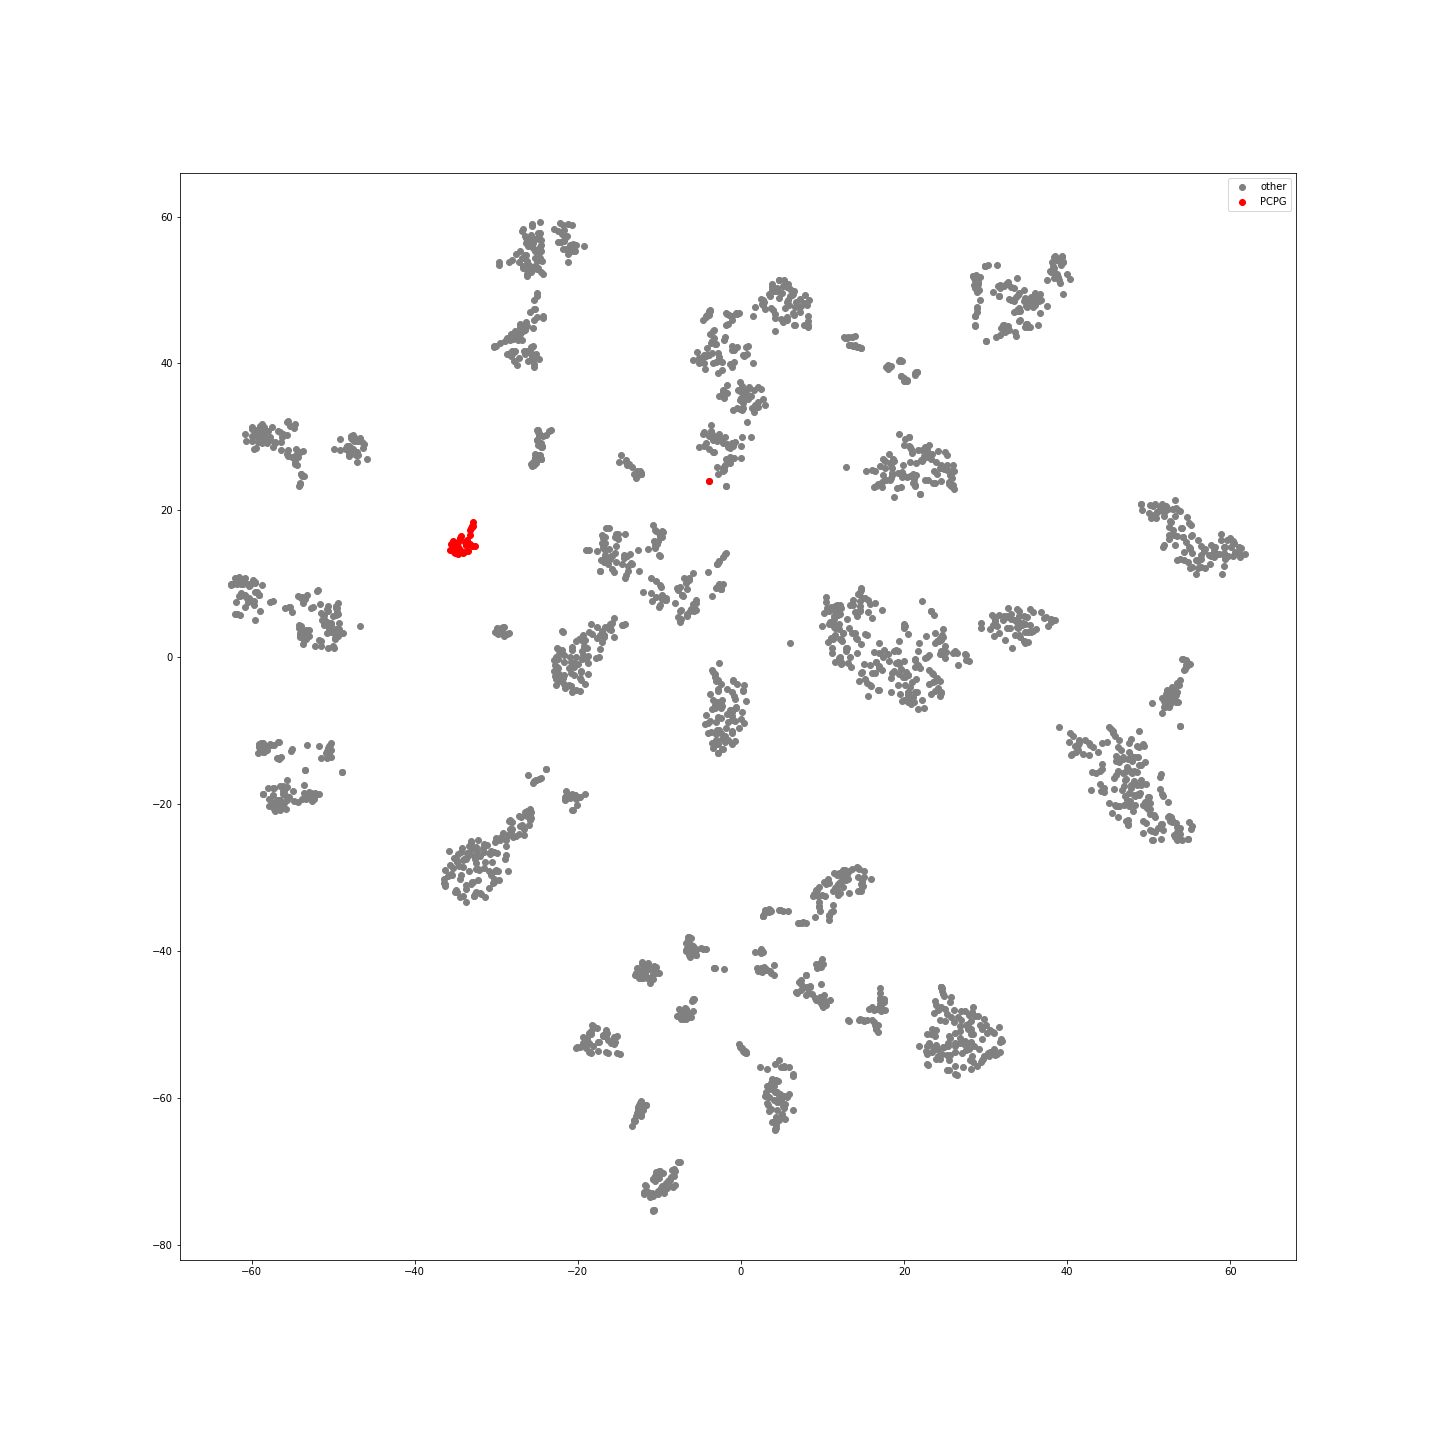


Supplementary Figure 51:PCPG Samples in Latent Space


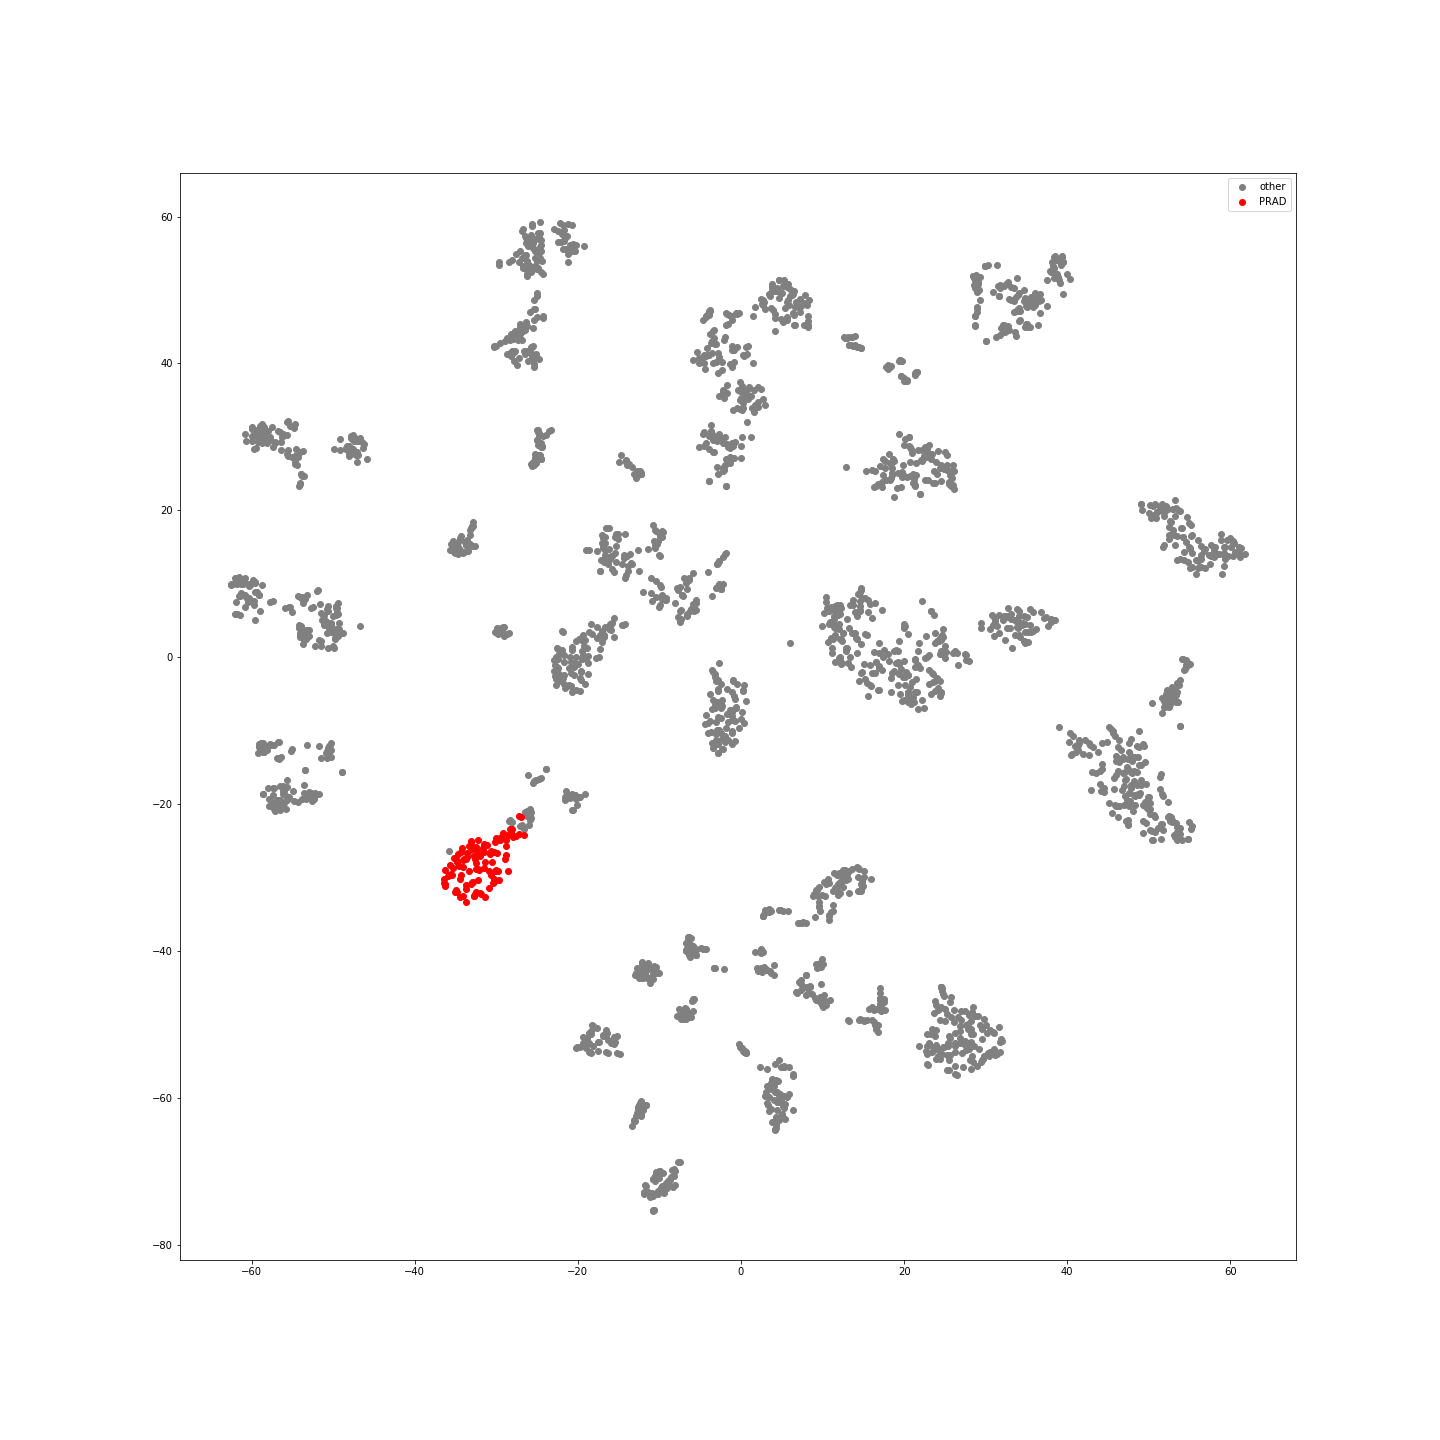


Supplementary Figure 52: PRAD Samples in Latent Space


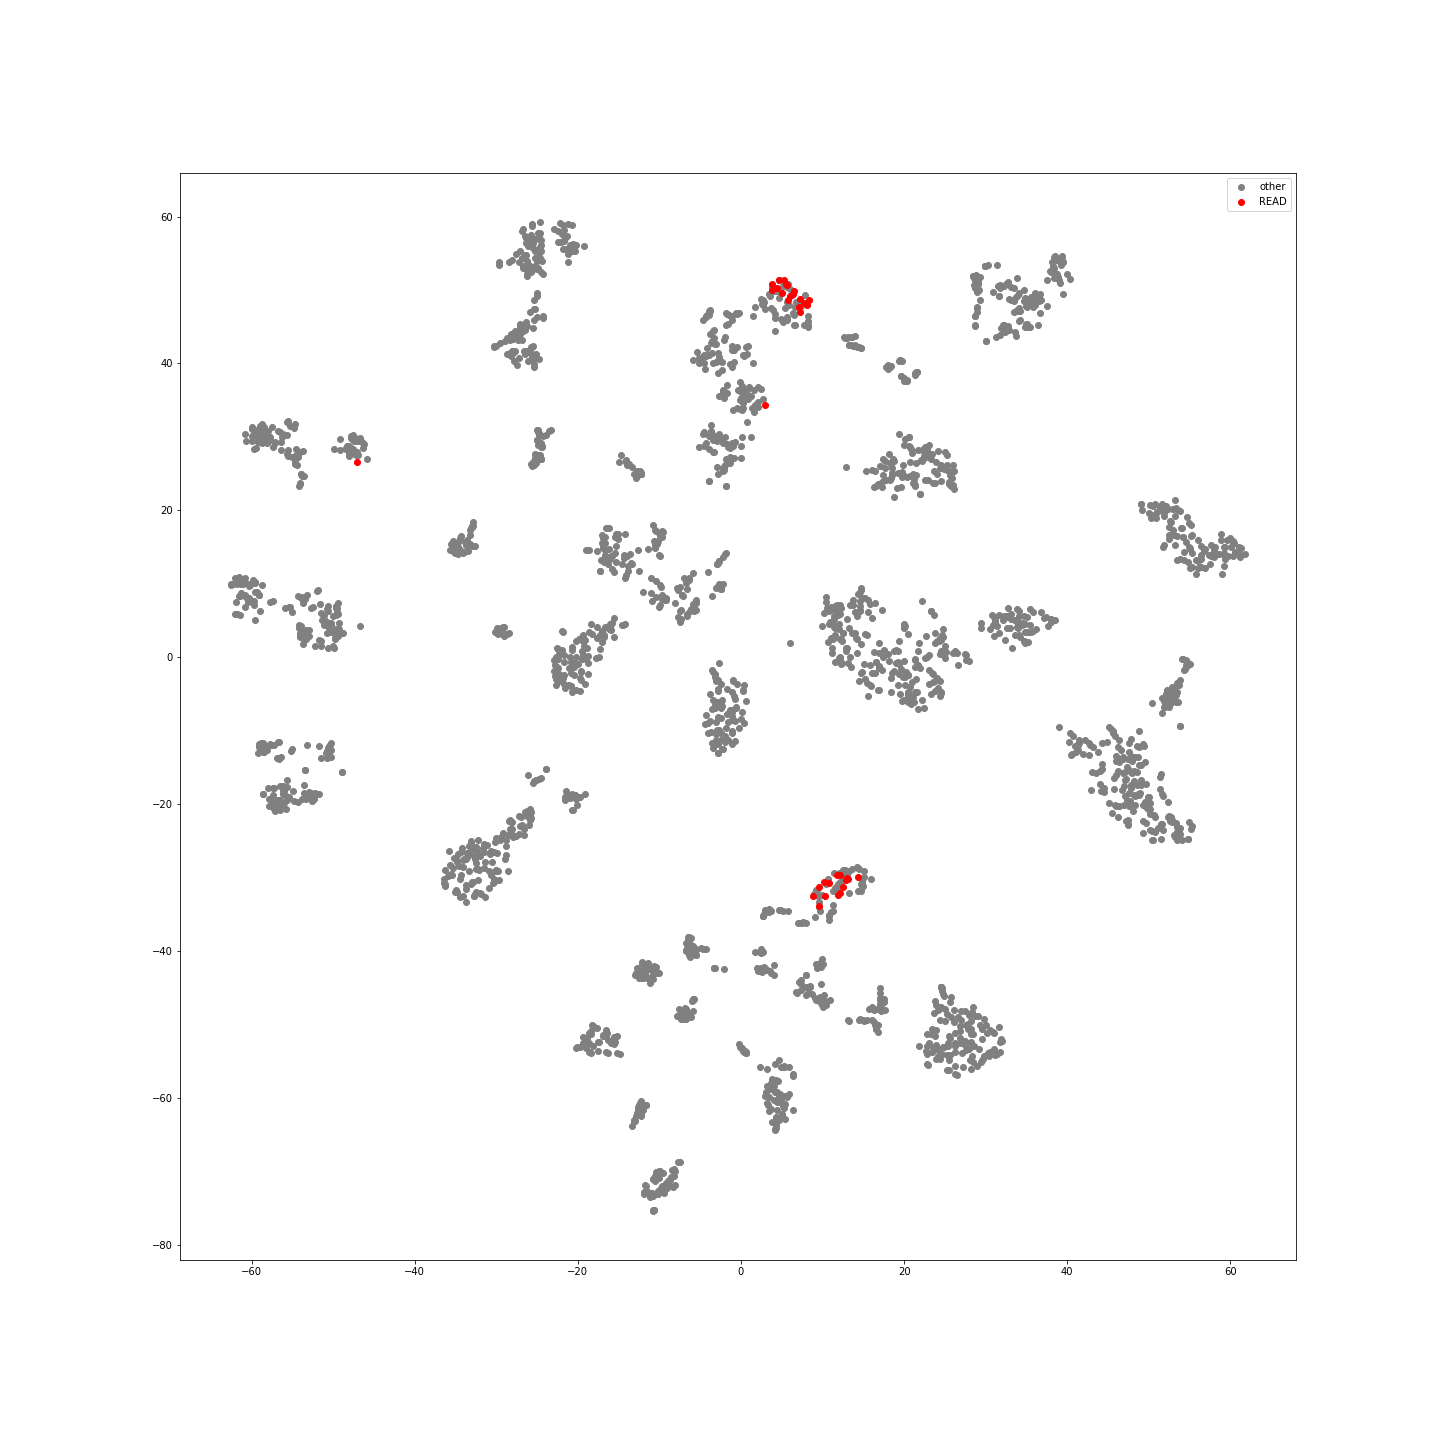


Supplementary Figure 53: READ Samples in Latent Space


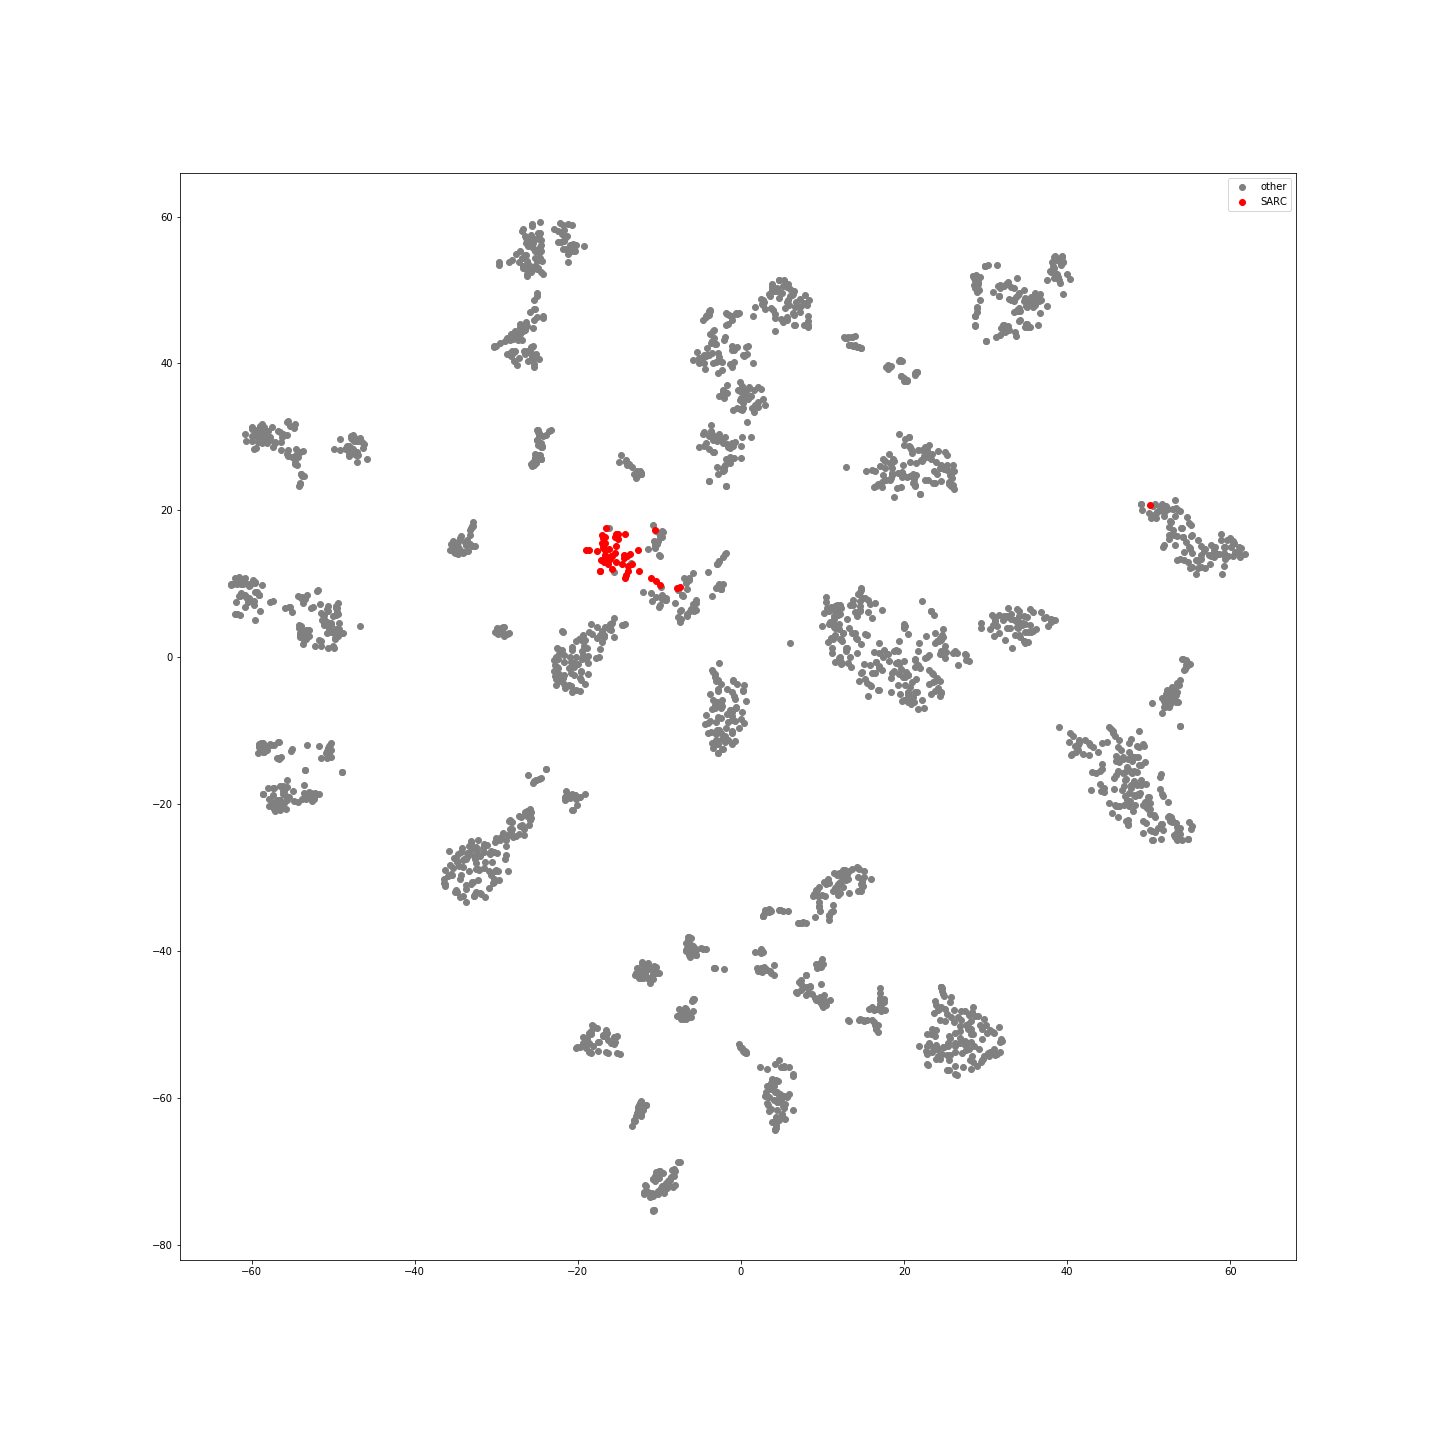


Supplementary Figure 54: SARC Samples in Latent Space


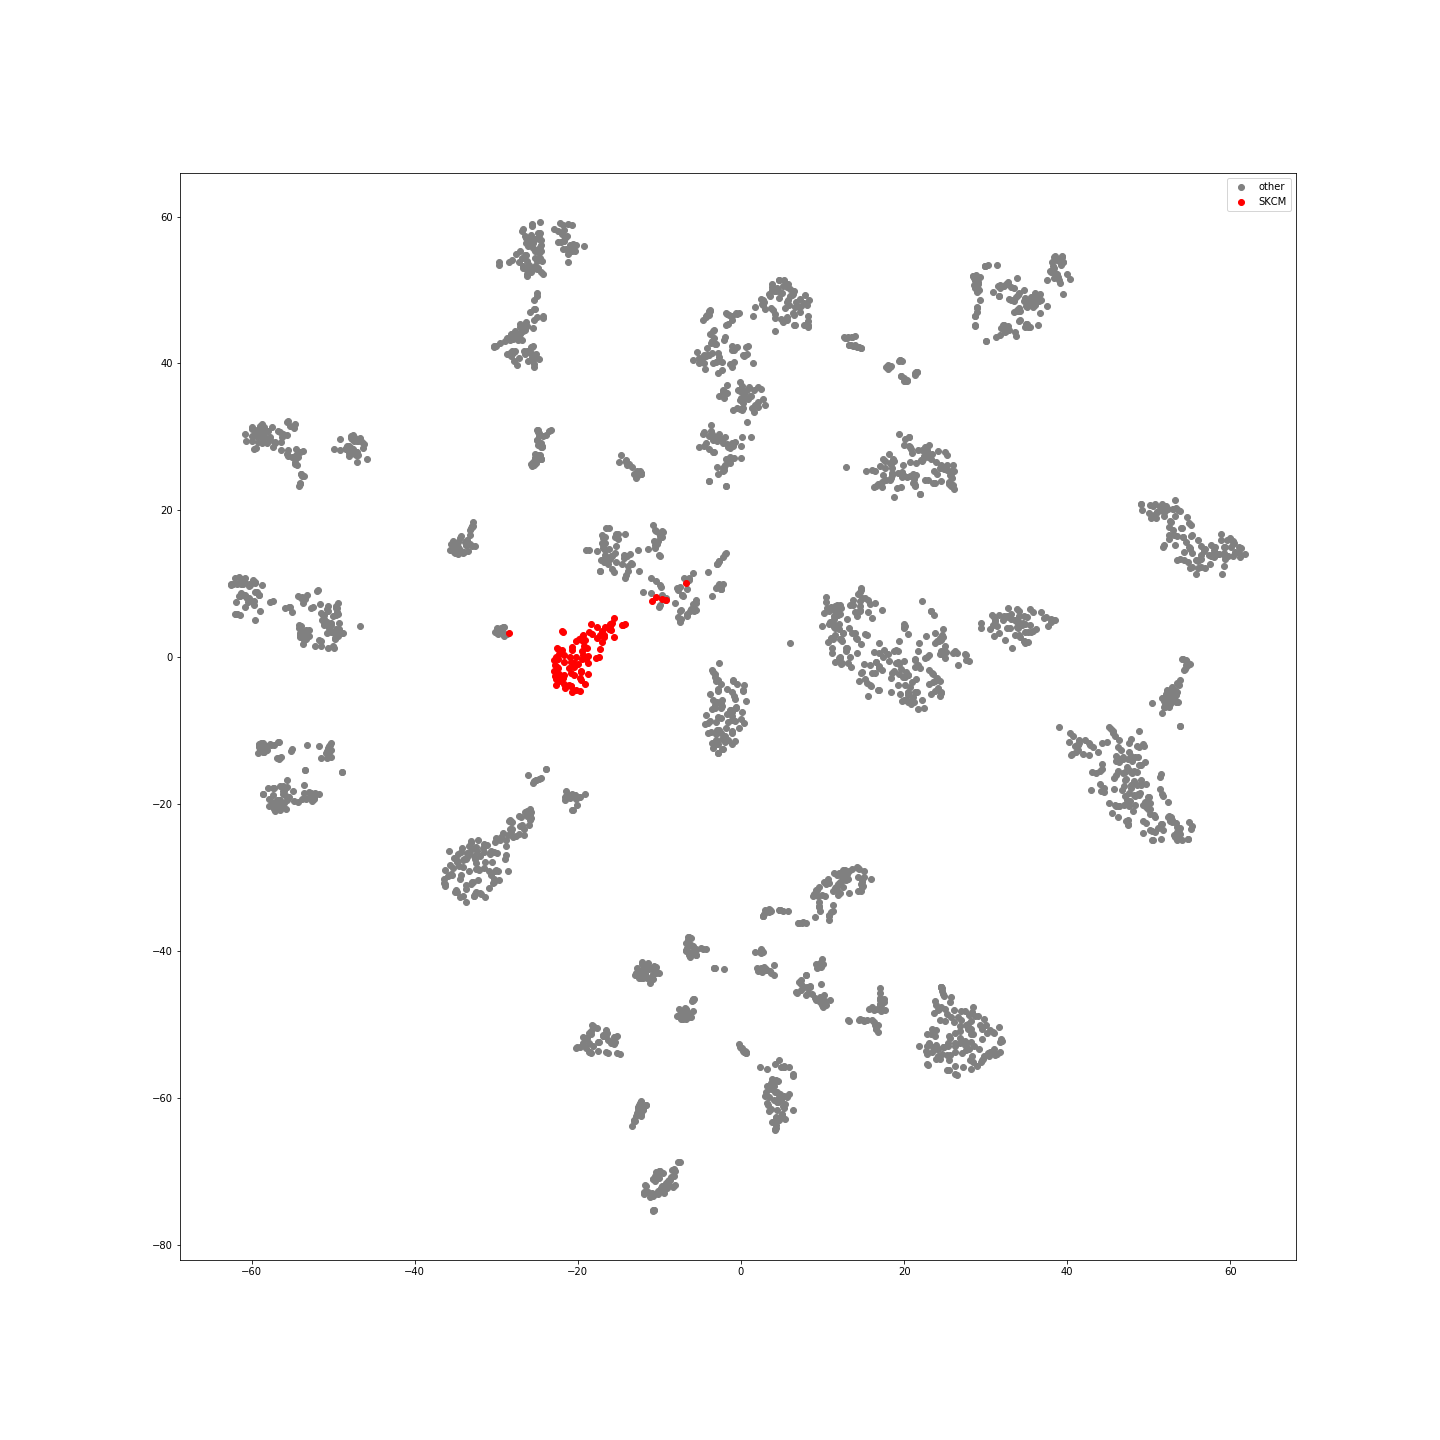


Supplementary Figure 55: SKCM Samples in Latent Space


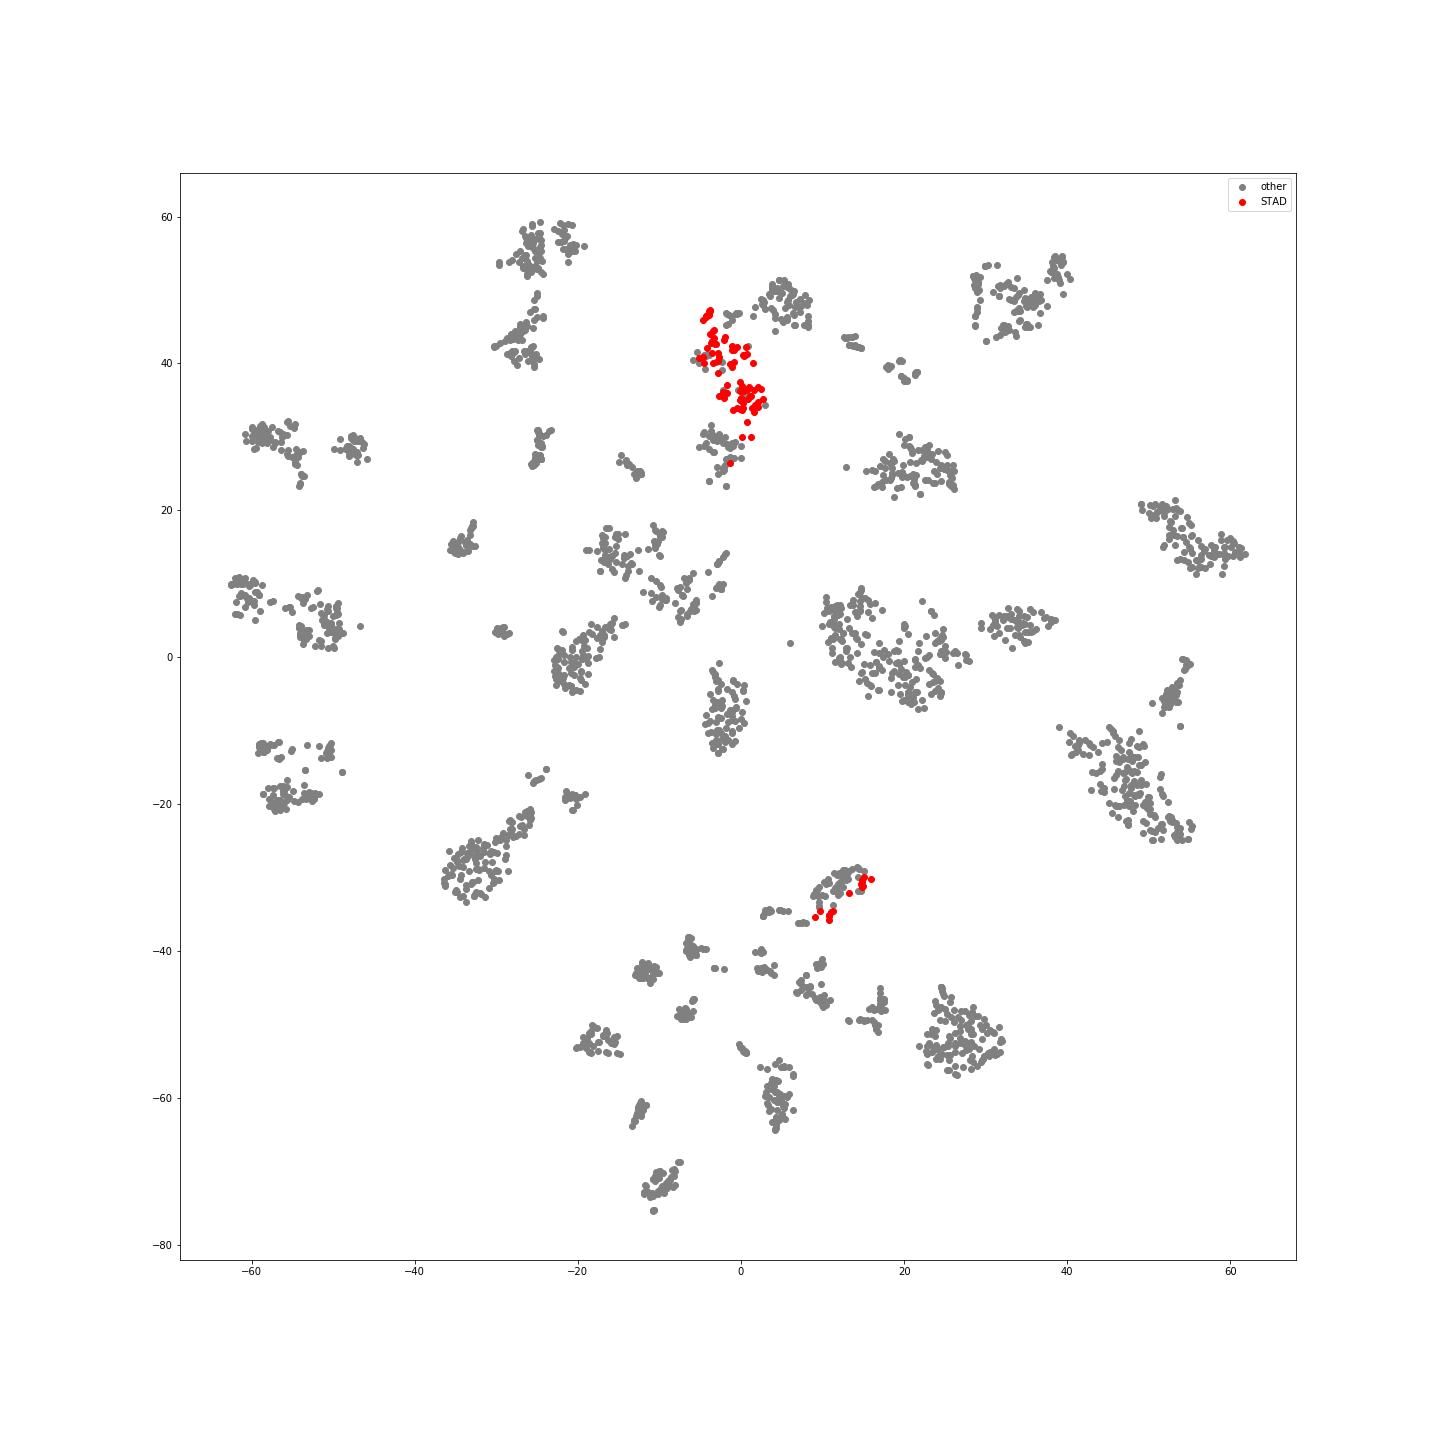


Supplementary Figure 56: STAD Samples in Latent Space


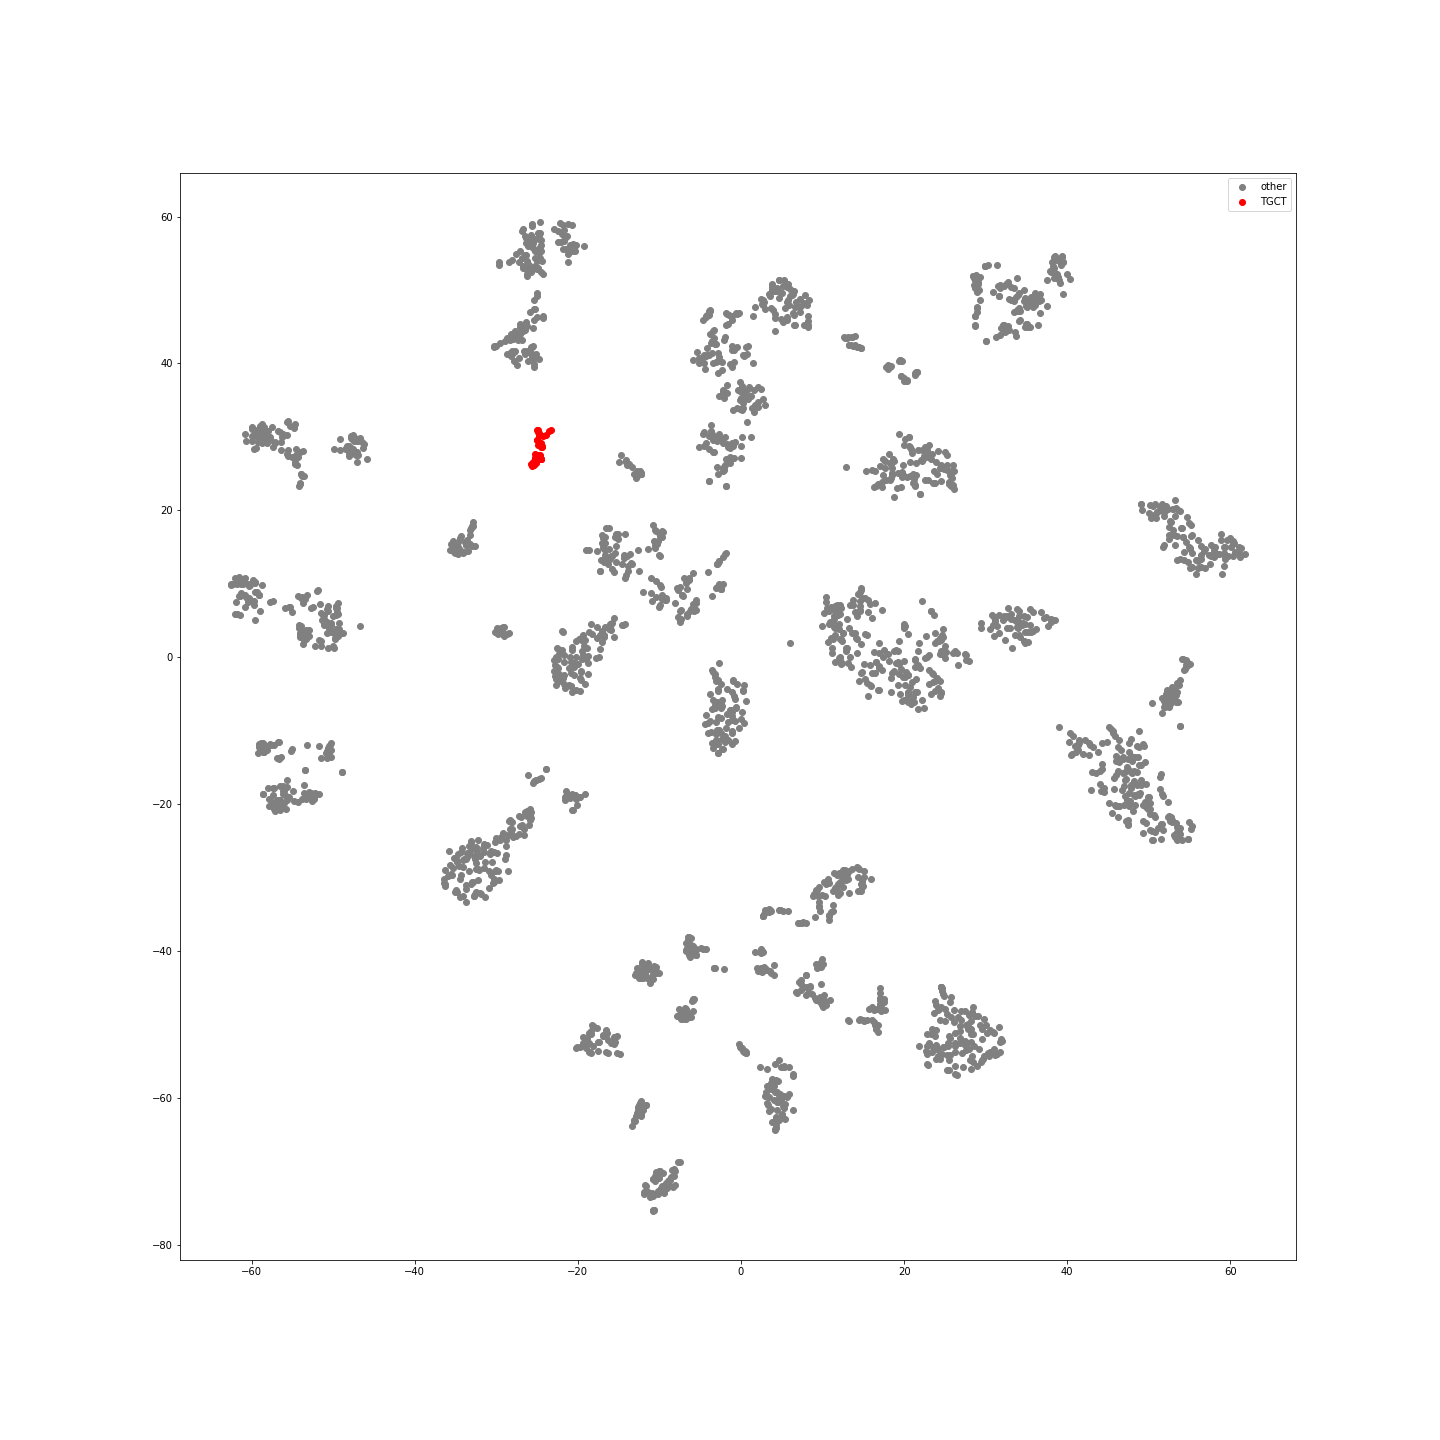


Supplementary Figure 57:TGCT Samples in Latent Space


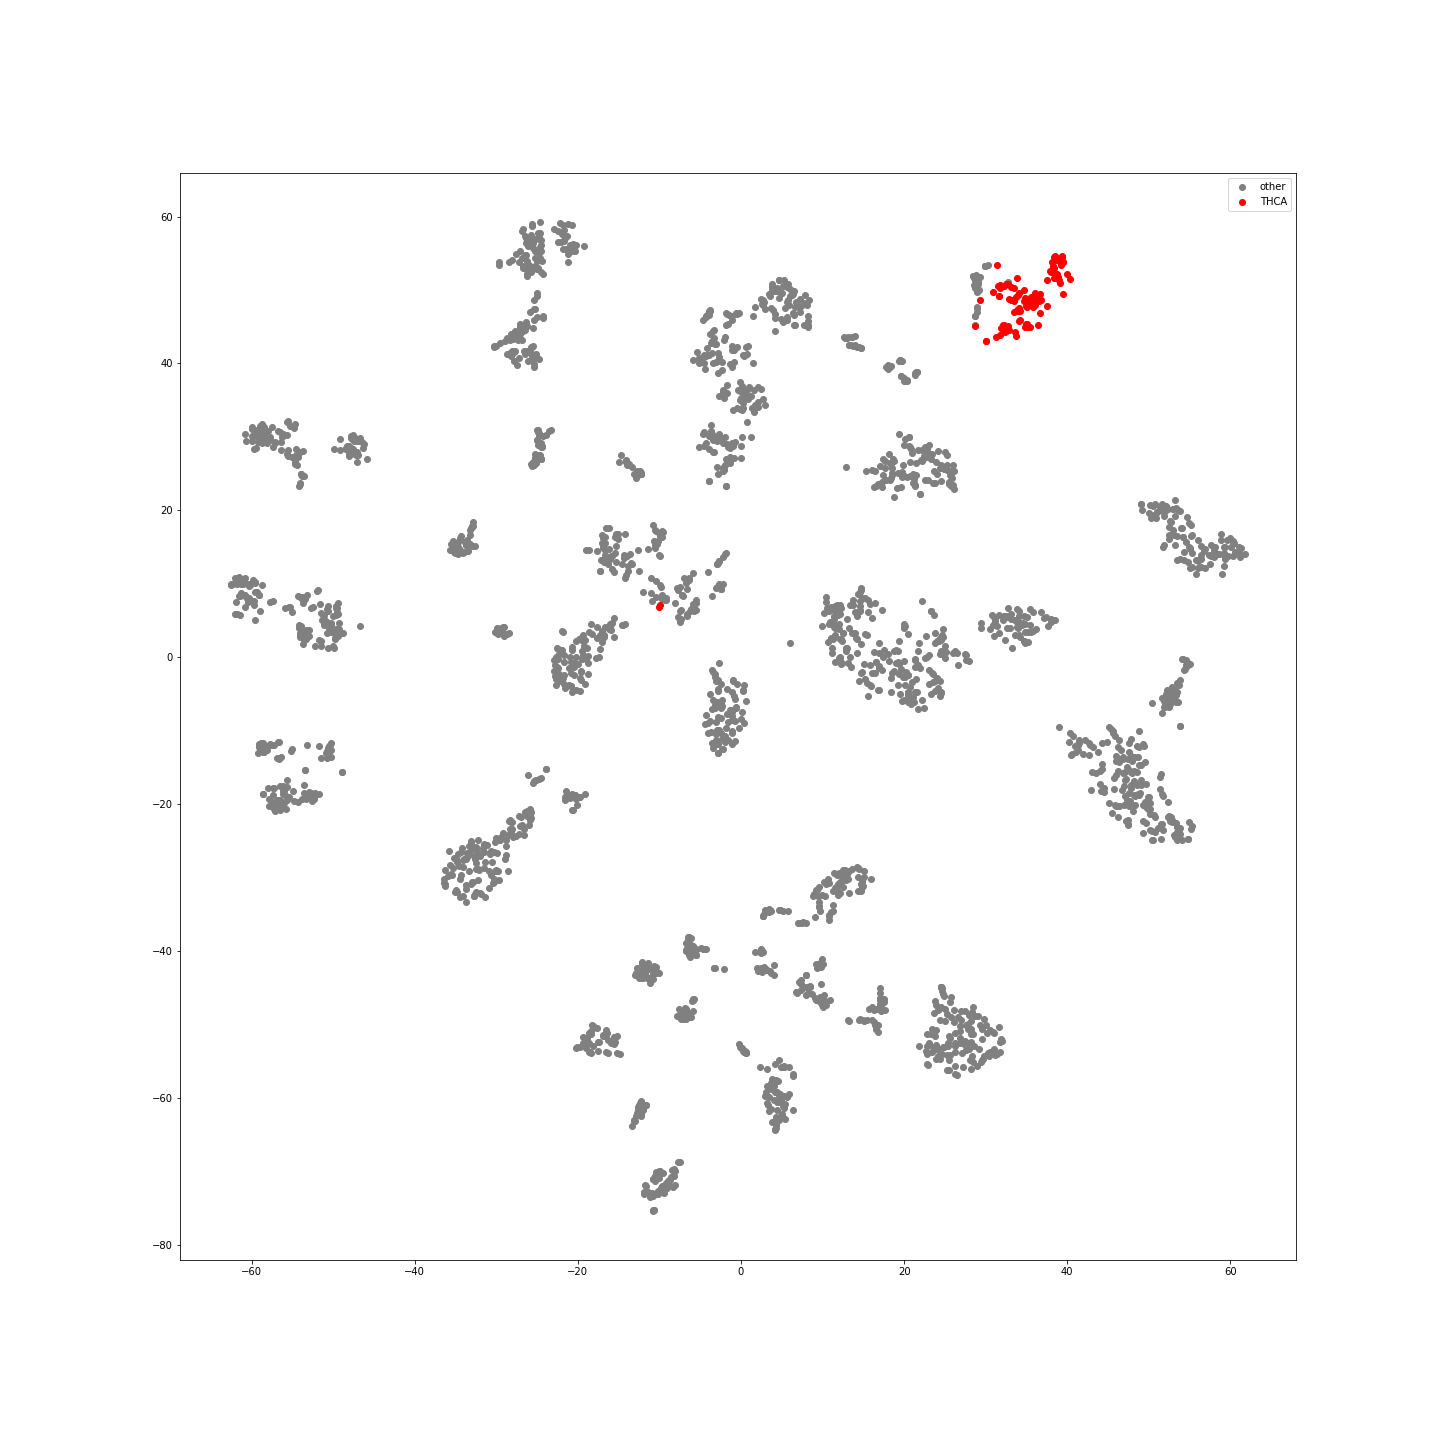


Supplementary Figure 58:THCA Samples in Latent Space


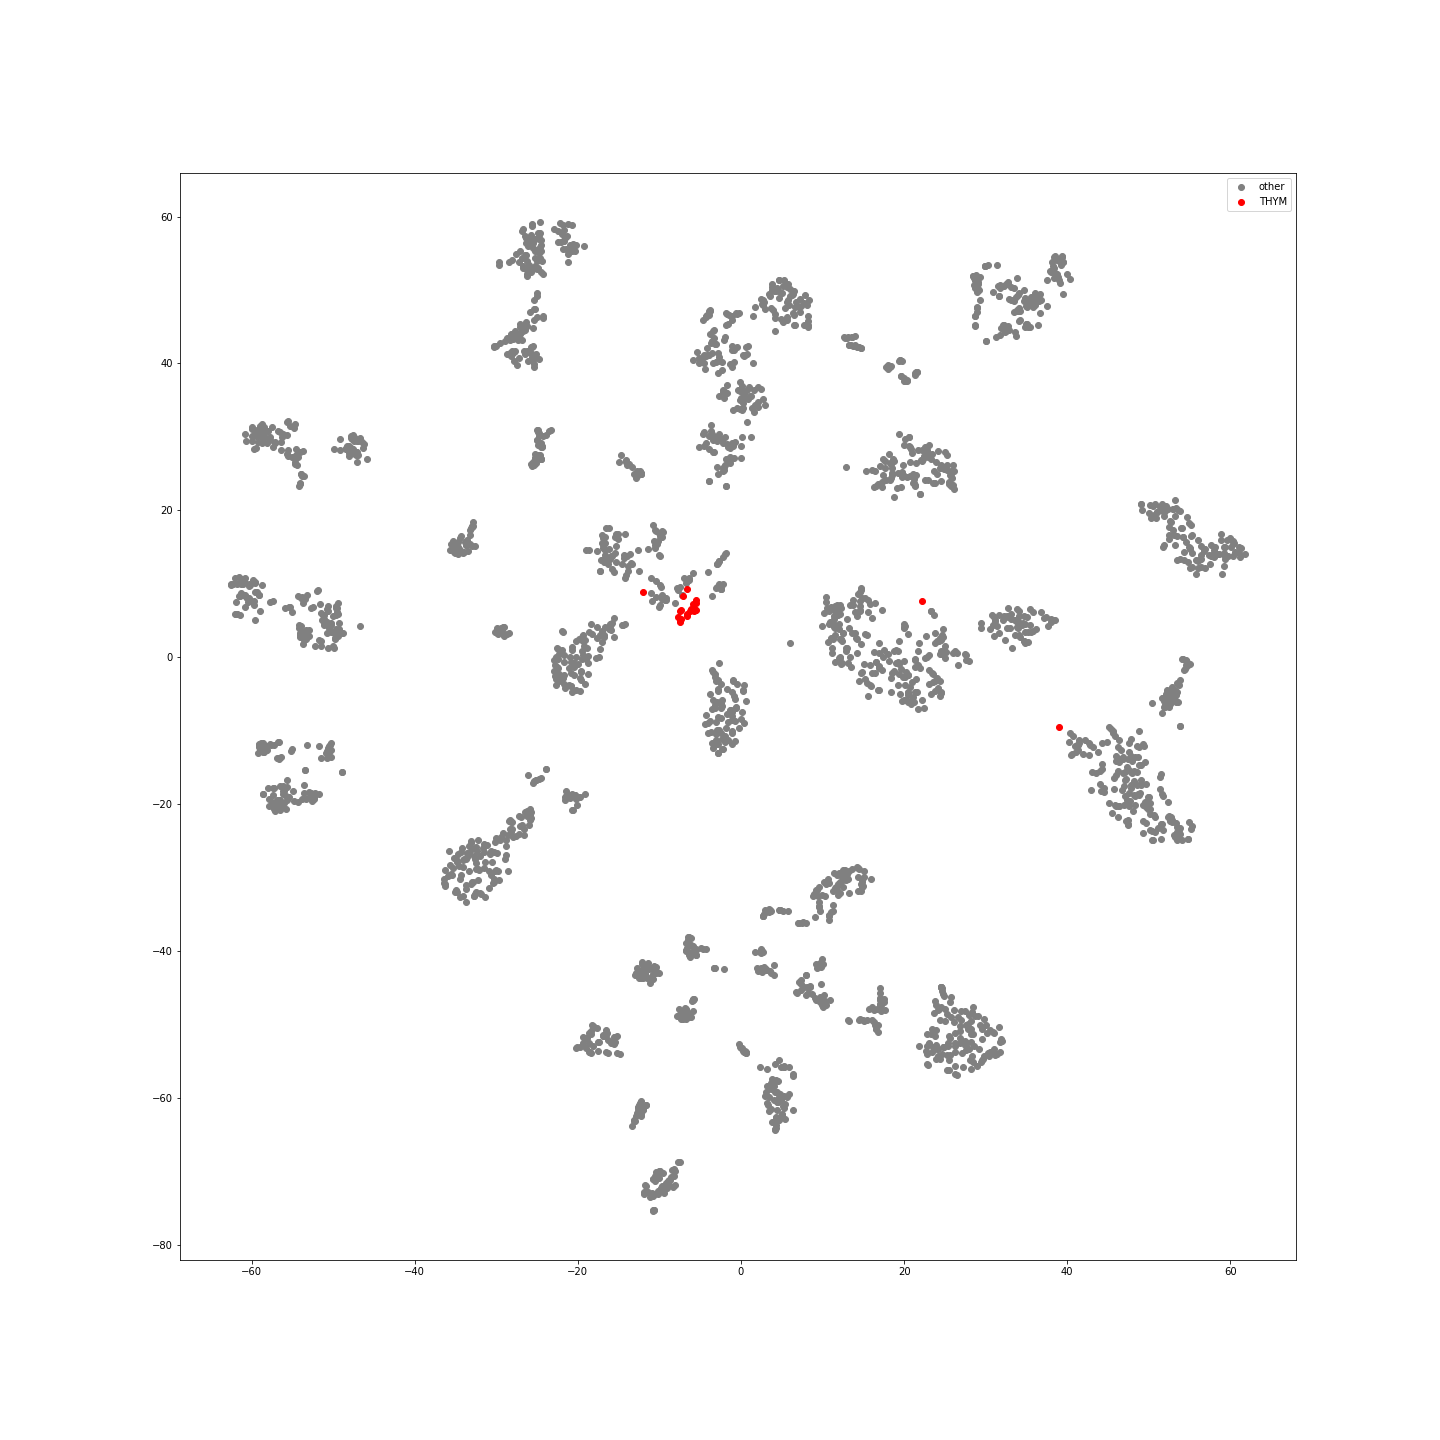


Supplementary Figure 59:THYM Samples in Latent Space


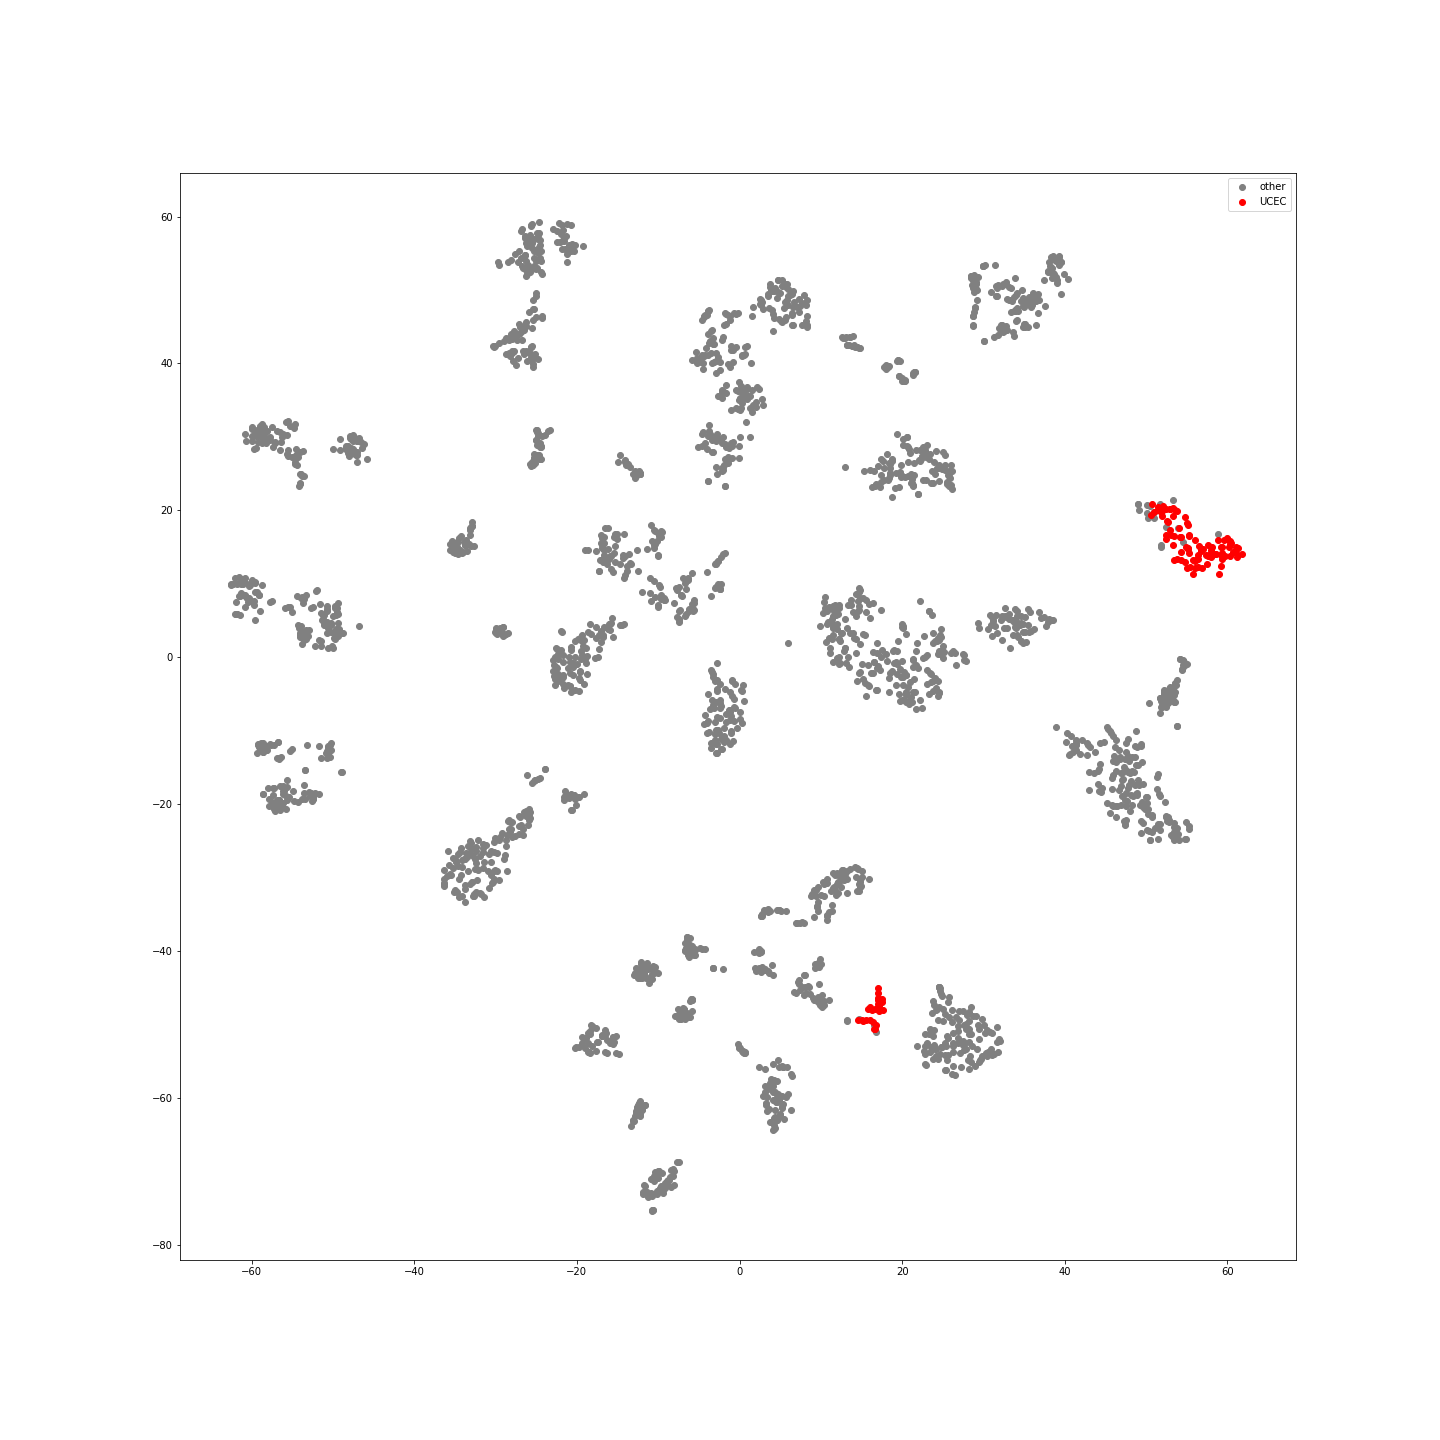


Supplementary Figure 60:UCEC Samples in Latent Space


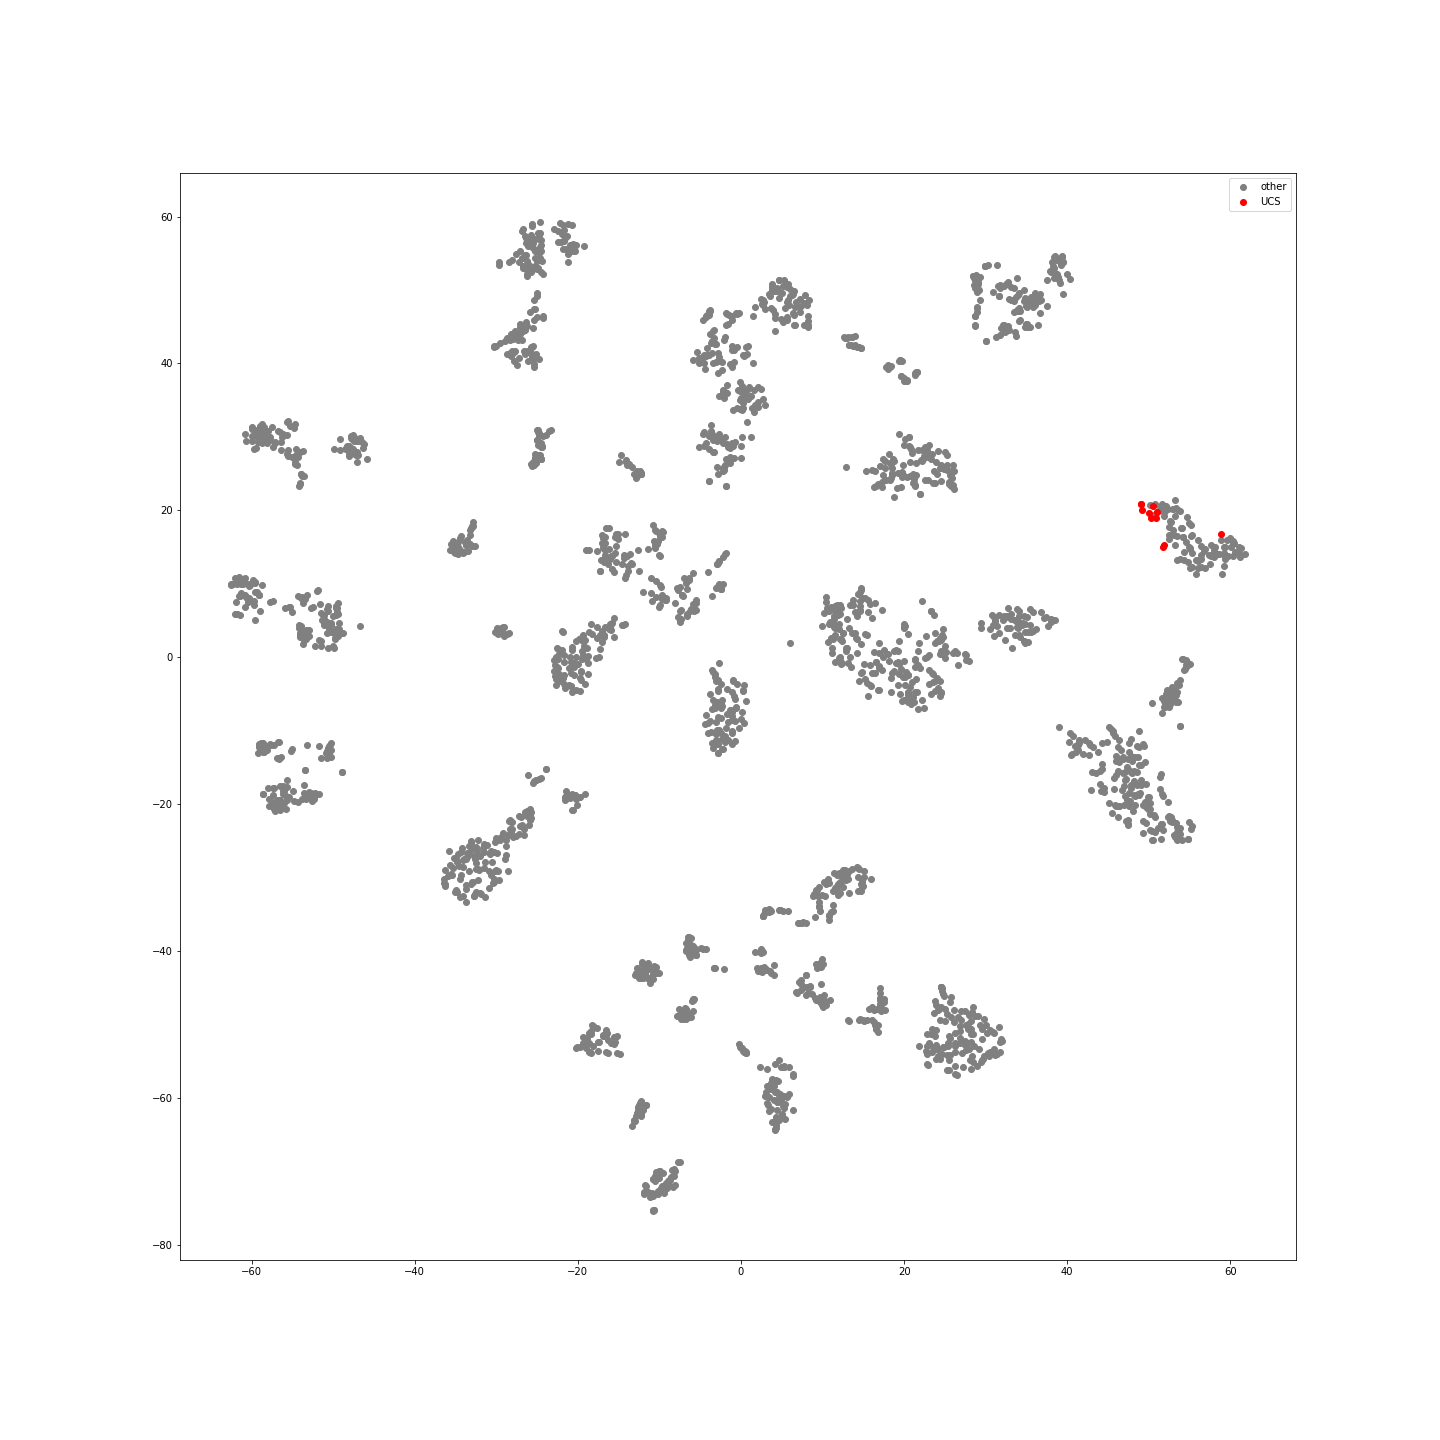


Supplementary Figure 61: UCS Samples in Latent Space


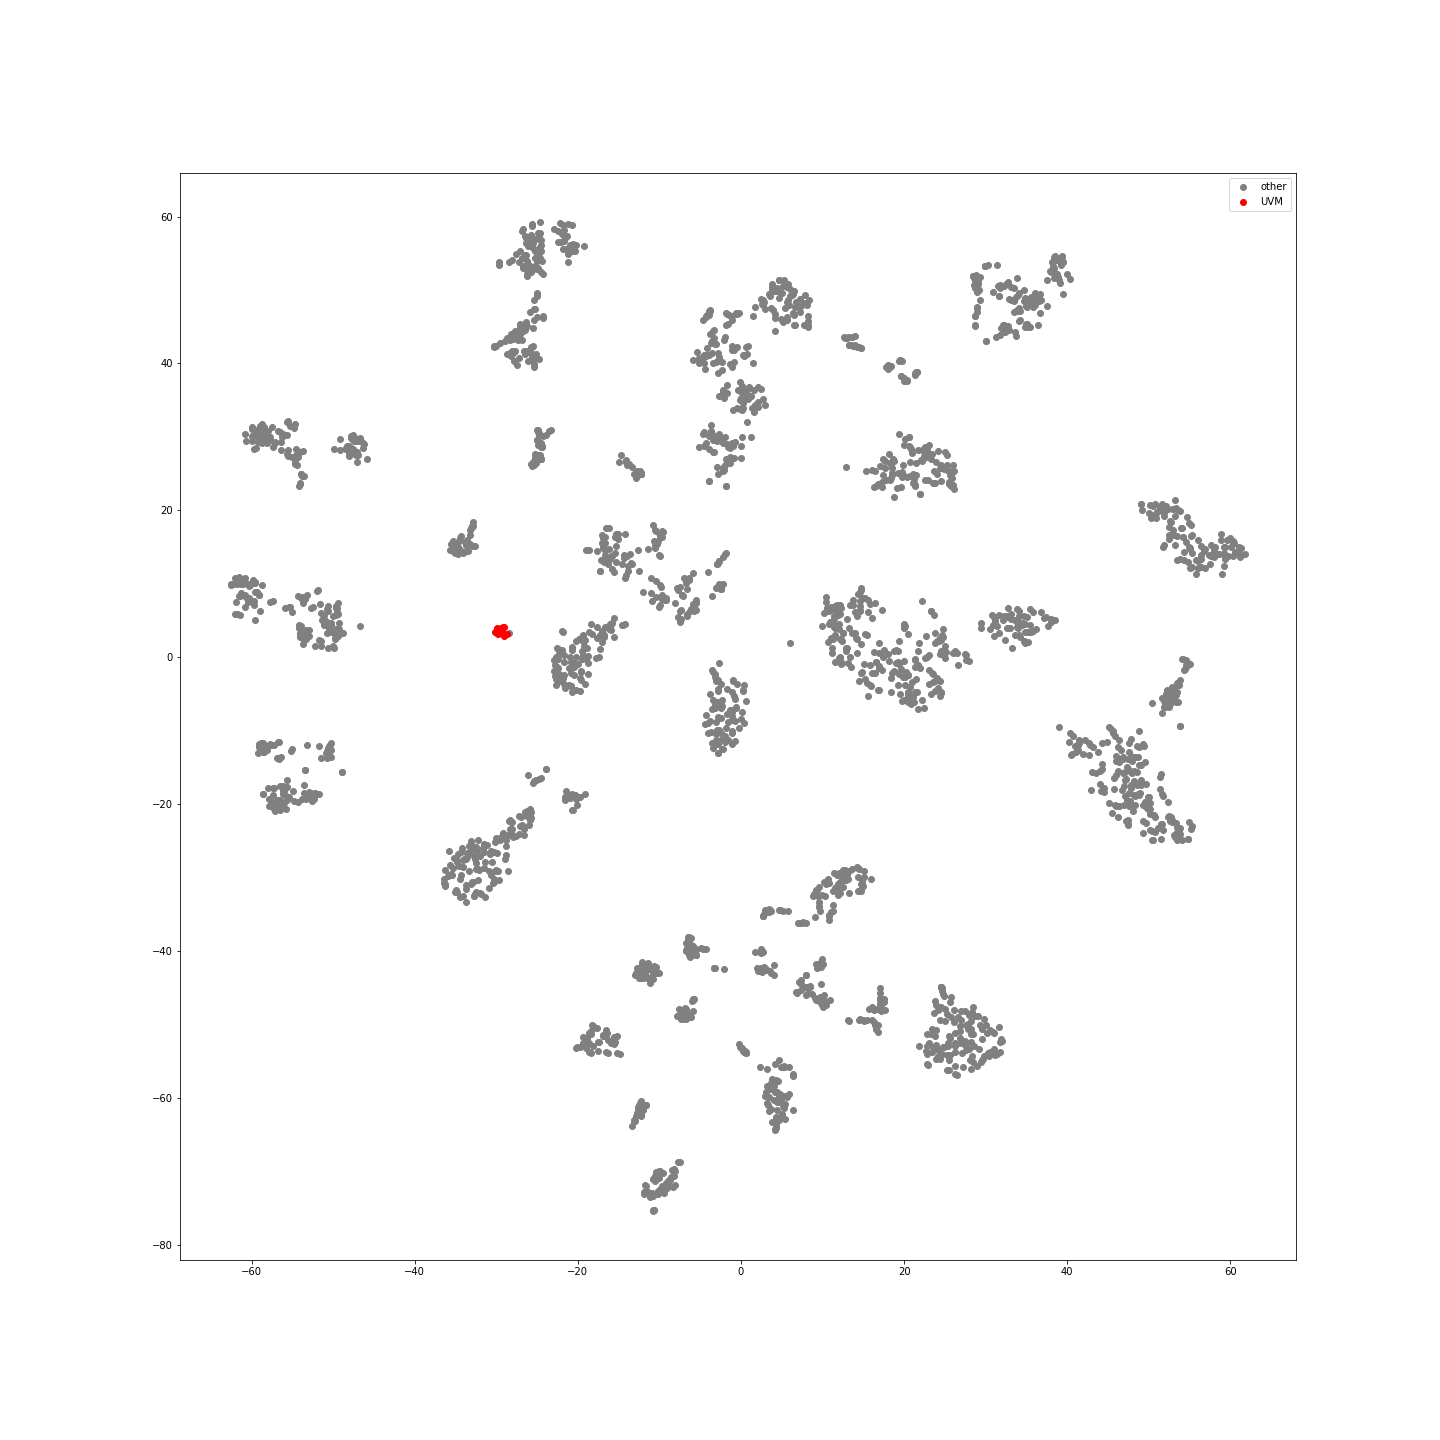


Supplementary Figure 62: UVM Samples in Latent Space

Supplementary Figure 63: Latent space arrangement of samples colored by predicted class


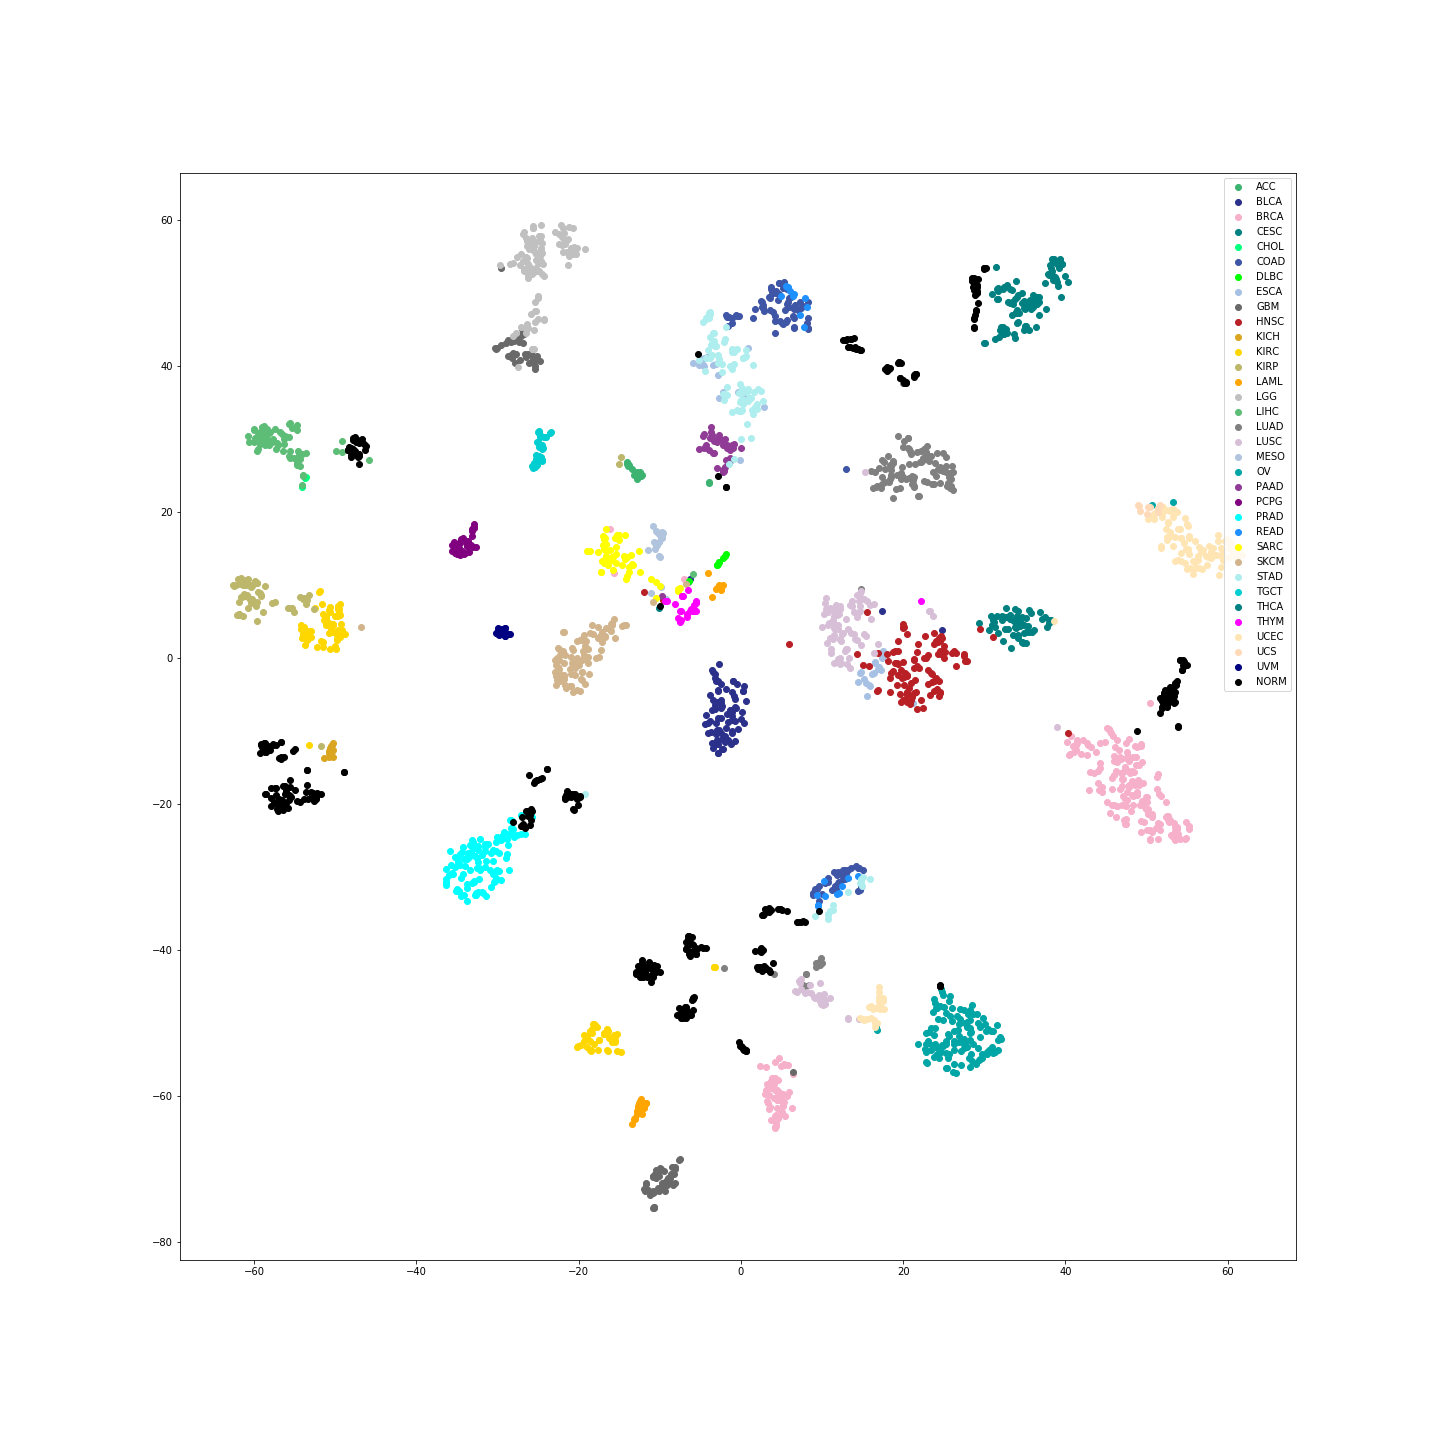


Supplementary Figure 63: All Samples in Latent Space
